# Supplementary material for: Genome-wide Analysis of CNVs in Three Populations of Tibetan Sheep using Whole-genome Resequencing
Source: Research Square preprint supplement (doi:10.21203/rs.3.rs-1145952/v1), 2021-12-29
Supplement: Supplementary file 1 [file 1dddb3b4ff60a90b17ffe5a0.xlsx]

## Sheet: CNVRs.number
Table S4. The number of CNVRS distributed on chromosomes in three populations.
chr	len	cout
1	275406953	162
2	248966461	110
3	223996068	138
4	119216639	96
5	107836144	69
6	116888256	78
7	100009711	67
8	90615088	36
9	94583238	65
10	86377204	138
11	62170480	47
12	79028859	37
13	82951069	54
14	62568341	73
15	80783214	73
16	71693149	40
17	72251135	40
18	68494538	34
19	60445663	30
20	51049468	70
21	49987992	28
22	50780147	31
23	62282865	23
24	41976827	11
25	45223504	32
26	44047080	15
27	135185801	1180

## Sheet: CNVRs.length
Table S4. The length of CNVRS distributed on each chromosome of three populations
Chr	len
	VTS	OTS	HTS
1	334800	328800	318400
2	210800	209600	216800
3	359600	341600	352400
4	282400	282800	228800
5	113200	121200	76400
6	136800	156400	136800
7	264400	280400	284800
8	252400	211600	245600
9	156000	145600	148800
10	741600	781200	764000
11	81200	76800	84000
12	45600	64000	49200
13	85600	60000	101600
14	292400	287200	268000
15	244400	237200	255200
16	124400	124000	135600
17	148800	157600	157200
18	69600	55200	82000
19	49600	53600	60400
20	271600	275600	268000
21	52400	54800	35600
22	49600	45600	47200
23	31200	29600	29600
24	28400	28400	33200
25	50800	52800	40000
26	29600	29200	22000
27	2536800	2389600	2394800
