# Supplementary material for: Genome-wide Analysis of CNVs in Three Populations of Tibetan Sheep using Whole-genome Resequencing
Source: Research Square preprint supplement (doi:10.21203/rs.3.rs-1145952/v1), 2021-12-29
Supplement: Supplementary file 2 [file 368111333cb428d36d3d3be3.xlsx]

## Sheet: all CNVRs
Table S3.Detailed information of the detected CNVRs.
chr	start	end	Length	Type	Gene name	Gene type
1	1438401	1440000	1600	DUP	LOC101106736;LOC101107492	intergenic
1	1453601	1457200	3600	DUP	LOC101107492;LOC101107754	intergenic
1	3795201	3797200	2000	DUP	TRNAC-ACA;COL6A3	intergenic
1	6230401	6232000	1600	DEL	LOC105616167;LOC105610605	intergenic
1	7121601	7123600	2000	DUP	LOC105616317	exon
1	7125201	7128400	3200	DUP	LOC105616317	intron
1	8289601	8291200	1600	DUP	CSMD2	intron
1	11541201	11542800	1600	DUP	GRIK3	intron
1	21230401	21238400	8000	DUP	LOC101113120;LOC101105863	intergenic
1	21242801	21245200	2400	DUP	LOC101105863	intron
1	21247601	21249200	1600	DUP	LOC101105863	intron
1	23550801	23552800	2000	DEL	AGBL4	intron
1	24366001	24368000	2000	DUP	ELAVL4	intron
1	24547601	24550800	3200	DUP	ELAVL4;DMRTA2	intergenic
1	26736001	26738000	2000	DUP	GPX7;ZCCHC11	intergenic
1	32058001	32060000	2000	DEL	DAB1	intron
1	33973601	33976000	2400	DUP	FGGY	intron
1	34484801	34486400	1600	DEL	LOC101121820;LOC101104943	intergenic
1	34488401	34490000	1600	DEL	LOC101121820;LOC101104943	intergenic
1	34490401	34509600	19200	DEL	LOC101121820;LOC101104943	intergenic
1	34512001	34514000	2000	DEL	LOC101121820;LOC101104943	intergenic
1	49475201	49476800	1600	DEL	LRRIQ3;NEGR1	intergenic
1	50521201	50522800	1600	DUP	TYW3;LHX8	intergenic
1	51127201	51128800	1600	DUP	RABGGTB;SLC44A5	intergenic
1	54940401	54942400	2000	DUP	TRNAC-GCA;TRNAW-CCA	intergenic
1	57993201	57995200	2000	DUP	TRNAC-ACA;ADGRL2	intergenic
1	60548801	60550800	2000	DUP	PRKACB;SAMD13	intergenic
1	61746401	61748400	2000	DEL	DDAH1	intron
1	62554801	62556400	1600	DUP	TRNAV-CAC;COL24A1	intergenic
1	65615601	65617200	1600	DUP	LOC105614852;LOC101119773	intergenic
1	65634801	65636400	1600	DUP	LOC105614852;LOC101119773	intergenic
1	65641601	65644400	2800	DUP	LOC105614852;LOC101113817	intergenic
1	65661601	65663600	2000	DUP	LOC101113817;GBP5	intergenic
1	65855201	65856800	1600	DUP	LOC101114077;LOC101114579	intergenic
1	70672001	70676000	4000	DEL	ABCD3	intron
1	71967601	71971200	3600	DUP	TRNAC-GCA;RWDD3	intergenic
1	76274801	76276800	2000	DUP	FRRS1;AGL	intergenic
1	77548801	77550800	2000	DEL	LOC106990850;LOC105615111	intergenic
1	77688401	77690400	2000	DEL	S1PR1;LOC105610866	intergenic
1	81411601	81414800	3200	DEL	LOC101119090;PRMT6	intergenic
1	81883201	81885600	2400	DEL	LOC101119090;PRMT6	intergenic
1	82386401	82388800	2400	DUP	LOC101119090;PRMT6	intergenic
1	84309201	84311200	2000	DEL	VAV3	intron
1	87784401	87786400	2000	DEL	LOC101106738;LOC101113807	intergenic
1	89862401	89864400	2000	DEL	MAGI3	intron
1	90952001	90954400	2400	DEL	LOC101109325;TRIM33	intergenic
1	93134401	93136000	1600	DEL	CD2;IGSF3	intergenic
1	93886401	93888000	1600	DEL	MAN1A2	intron
1	95350001	95352000	2000	DUP	SPAG17;TBX15	intergenic
1	96837201	96843200	6000	DUP	TRNAC-GCA;LOC101112864	intergenic
1	96920801	96932000	11200	DUP	TRNAN-GUU;LOC101112943	intergenic
1	96933201	96951200	18000	DUP	LOC101112943	intron
1	96959201	96964000	4800	DUP	LOC101112943	intron
1	96964801	96968800	4000	DUP	LOC101112943	intron
1	97499201	97501200	2000	DUP	LOC101113720;BCL9	intergenic
1	98370801	98372400	1600	DUP	TRNAH-GUG;TRNAN-GUU	intergenic
1	98476801	98479200	2400	DUP	TRNAQ-CUG;TRNAN-GUU	intergenic
1	98479601	98482400	2800	DUP	TRNAG-CCC;TRNAV-AAC	intergenic
1	98495601	98497200	1600	DUP	TRNAG-CCC;TRNAV-AAC	intergenic
1	98511601	98513600	2000	DUP	LOC105615522	intron
1	101946001	101948000	2000	DUP	LOC105615728;LOC106990856	intergenic
1	101953201	101954800	1600	DUP	LOC105615728;LOC106990856	intergenic
1	101980401	101982000	1600	DUP	LOC105615733;LELP1	intergenic
1	107442001	107443600	1600	DEL	LOC101111677;LOC101111409	intergenic
1	107626001	107627600	1600	DEL	LOC101112179;LOC101117985	intergenic
1	107648401	107650400	2000	DEL	LOC101117985;LOC101118242	intergenic
1	107742001	107744400	2400	DEL	LOC101118497;LOC101112436	intergenic
1	107997201	108001200	4000	DEL	LOC101121310;LOC105605630	intergenic
1	108834801	108836400	1600	DEL	APCS;CRP	intergenic
1	109978801	109981600	2800	DUP	SLAMF1;SLAMF7	intergenic
1	110238401	110240400	2000	DUP	ITLN;CD244	intergenic
1	110261601	110263600	2000	DUP	ITLN;CD244	intergenic
1	110267601	110269600	2000	DUP	ITLN;CD244	intergenic
1	110276801	110278400	1600	DUP	ITLN;CD244	intergenic
1	110294001	110296000	2000	DUP	ITLN;ITLN2	intergenic
1	110358001	110359600	1600	DUP	ITLN2;F11R	intergenic
1	110819601	110823200	3600	DUP	TRNAG-UCC;LOC101106730	intergenic
1	110853201	110854800	1600	DEL	TRNAG-UCC;LOC101106730	intergenic
1	111092801	111096800	4000	DUP	ATF6	intron
1	112332801	112336800	4000	DEL	HSD17B7;CCDC190	intergenic
1	113356801	113358800	2000	DEL	TRNAC-ACA;NUF2	intergenic
1	115461201	115463200	2000	DUP	LOC101109142;RXRG	intergenic
1	117040801	117050000	9200	DEL	MAEL;GPA33	intergenic
1	123545201	123547200	2000	DEL	LOC101115849;LOC101116371	intergenic
1	125604401	125606400	2000	DUP	N6AMT1;LOC105610400	intergenic
1	126976801	126978400	1600	DUP	LOC105611820;LOC105610400	intergenic
1	127163601	127165600	2000	DEL	LOC105611820;TRNAS-GGA	intergenic
1	128281601	128283600	2000	DUP	APP	intron
1	128320801	128322800	2000	DEL	APP	intron
1	131375601	131377600	2000	DEL	TRNAS-GGA;LOC106990865	intergenic
1	131770801	131772800	2000	DEL	TRNAS-GGA;NCAM2	intergenic
1	134572401	134574800	2400	DEL	NCAM2;LOC101120465	intergenic
1	135250401	135252400	2000	DEL	TRNAF-GAA;TMPRSS15	intergenic
1	135846001	135847600	1600	DEL	TRNAF-GAA;TMPRSS15	intergenic
1	137110401	137115600	5200	DEL	CHODL;C1H21orf91	intergenic
1	141051601	141053600	2000	DEL	LOC101122496	intron
1	147826401	147828800	2400	DEL	TRNAS-GGA;GBE1	intergenic
1	149345601	149349200	3600	DEL	TRNAS-GGA;GBE1	intergenic
1	149527201	149528800	1600	DUP	TRNAS-GGA;GBE1	intergenic
1	150510401	150512400	2000	DEL	TRNAS-GGA;CADM2	intergenic
1	150514401	150520000	5600	DEL	TRNAS-GGA;CADM2	intergenic
1	150523201	150529200	6000	DEL	TRNAS-GGA;CADM2	intergenic
1	150532801	150536800	4000	DEL	TRNAS-GGA;CADM2	intergenic
1	150538801	150546800	8000	DEL	TRNAS-GGA;CADM2	intergenic
1	151695601	151697600	2000	DUP	CADM2	intron
1	153636801	153639200	2400	DEL	TRNAR-ACG;VGLL3	intergenic
1	158130401	158132400	2000	DEL	NSUN3;EPHA6	intergenic
1	160635201	160636800	1600	DEL	LOC101104359;LOC101103944	intergenic
1	160638001	160646000	8000	DEL	LOC101103944	exon
1	160647201	160661600	14400	DEL	LOC101104620;LOC101104875	intergenic
1	163484801	163486800	2000	DUP	ABI3BP	intron
1	165279201	165281200	2000	DEL	TRNAW-CCA;ZPLD1	intergenic
1	169171601	169173200	1600	DEL	CBLB;LOC105612549	intergenic
1	169868401	169870400	2000	DUP	LOC105612549	intron
1	175374401	175376800	2400	DEL	TRNAW-CCA;BTLA	intergenic
1	181636401	181638400	2000	DUP	TRNAS-GGA;LOC101104286	intergenic
1	181639201	181641200	2000	DUP	TRNAS-GGA;LOC101104286	intergenic
1	182301601	182303600	2000	DEL	ARHGAP31	intron
1	183110401	183112400	2000	DEL	GPR156	intron
1	186761601	186763600	2000	DUP	KALRN	intron
1	193498001	193499600	1600	DEL	LOC105602566;FGF12	intergenic
1	206424801	206427200	2400	DEL	KCNMB2	intron
1	209208401	209210000	1600	DUP	TBL1XR1;NAALADL2	intergenic
1	209329201	209331200	2000	DEL	NAALADL2	intron
1	210606801	210608800	2000	DEL	NAALADL2	intron
1	211000001	211002000	2000	DUP	TRNAS-GGA;NLGN1	intergenic
1	214012801	214014800	2000	DUP	TNIK	intron
1	218263201	218265200	2000	DUP	LOC105603542;ZBBX	intergenic
1	218606001	218607600	1600	DEL	LOC105603542;ZBBX	intergenic
1	220259201	220261600	2400	DEL	SI	intron
1	220559601	220561200	1600	DEL	LOC101116449;SI	intergenic
1	222006401	222008400	2000	DEL	LOC101103029;OTOL1	intergenic
1	222011201	222012800	1600	DEL	LOC101103029;OTOL1	intergenic
1	222020801	222022400	1600	DEL	LOC101103029;OTOL1	intergenic
1	222320001	222322800	2800	DEL	LOC101103029;OTOL1	intergenic
1	223436001	223439600	3600	DUP	LOC101103029;OTOL1	intergenic
1	226848401	226850000	1600	DEL	GFM1;MLF1	intergenic
1	230716001	230718000	2000	DEL	TRNAR-UCU;MME	intergenic
1	230719201	230724000	4800	DEL	TRNAR-UCU;MME	intergenic
1	230801601	230809200	7600	DEL	TRNAR-UCU;MME	intergenic
1	233800401	233802000	1600	DEL	TRNAC-GCA;MBNL1	intergenic
1	234387601	234389200	1600	DEL	LOC101116443;IGSF10	intergenic
1	234515601	234526000	10400	DUP	LOC101116443;IGSF10	intergenic
1	237119201	237122400	3200	DEL	TRNAC-ACA;CPA3	intergenic
1	238605201	238608800	3600	DEL	LOC106990808	intron
1	238692001	238694000	2000	DUP	LOC106990808	intron
1	239414001	239416000	2000	DEL	PLSCR5;LOC105604038	intergenic
1	239859601	239861200	1600	DUP	PLSCR5;PLSCR1	intergenic
1	241304401	241306400	2000	DUP	TRNAS-GGA;PLOD2	intergenic
1	249439201	249440800	1600	DUP	SOX14;LOC105604262	intergenic
1	249441201	249443200	2000	DUP	SOX14;LOC105604262	intergenic
1	254147201	254148800	1600	DUP	TMEM108	intron
1	255932401	255938800	6400	DEL	CPNE4	intron
1	257806801	257809600	2800	DEL	IGSF5	intron
1	258553201	258555200	2000	DUP	DSCAM	intron
1	258750401	258752400	2000	DEL	DSCAM	intron
1	264846001	264848400	2400	DUP	RUNX1	intron
1	268320401	268339200	18800	DUP	LOC106990471;KCNJ6	intergenic
1	269019601	269021600	2000	DUP	ETS2;LOC105604974	intergenic
1	269333601	269344000	10400	DUP	LOC101110904;LOC101111156	intergenic
1	270231601	270233200	1600	DUP	-	-
1	271331201	271333200	2000	DUP	RFTN1	intron
2	573601	579200	5600	DEL	TMEM18;SNTG2	intergenic
2	667201	672400	5200	DEL	SNTG2	intron
2	4737601	4739600	2000	DEL	TRNAC-GCA;TRNAS-GGA	intergenic
2	9956801	9958800	2000	DUP	LOC105606624;ZNF618	intergenic
2	13720001	13722000	2000	DEL	LOC105606785;LOC101114239	intergenic
2	14999601	15001600	2000	DUP	LOC105606800;LOC105606808	intergenic
2	16949201	16950800	1600	DUP	LOC105606824;LOC106990178	intergenic
2	21524401	21526800	2400	DUP	TMEM246;RNF20	intergenic
2	21530801	21532400	1600	DUP	TMEM246;RNF20	intergenic
2	22071201	22073200	2000	DEL	MURC;PLPPR1	intergenic
2	24971601	24974400	2800	DUP	LOC105606996;LOC105606997	intergenic
2	25384001	25385600	1600	DEL	LOC105606997;DIRAS2	intergenic
2	26972801	26974400	1600	DUP	SPTLC1	intron
2	33276401	33281200	4800	DUP	GAS1;ZCCHC6	intergenic
2	33498401	33500400	2000	DUP	CDC26;C2H9orf153	intergenic
2	37900401	37902400	2000	DUP	SMU1	intron
2	38384401	38386000	1600	DUP	STMN4	intron
2	39179601	39181600	2000	DUP	PPP2R2A	intron
2	40886001	40888000	2000	DUP	NEFM;ADAM7	intergenic
2	40888401	40893200	4800	DUP	NEFM;ADAM7	intergenic
2	42398801	42400800	2000	DUP	LOC105612581;CHMP7	intergenic
2	42418001	42427600	9600	DUP	RHOBTB2	intron
2	46338001	46340000	2000	DUP	LOC105607498;LOC101123612	intergenic
2	46340401	46343600	3200	DUP	LOC105607498;LOC101123612	intergenic
2	50193601	50195600	2000	DUP	ALDH1B1;SHB	intergenic
2	53976401	53978800	2400	DUP	LOC101110212;LOC101110483	intergenic
2	55270801	55274800	4000	DUP	LOC101111001;LOC101119878	intergenic
2	55276801	55279200	2400	DUP	LOC101111001;LOC101119878	intergenic
2	55386801	55388400	1600	DEL	LOC101111001;LOC101119878	intergenic
2	55990801	55992800	2000	DEL	LOC101111526;LOC105607767	intergenic
2	56126401	56128800	2400	DEL	LOC101111526	intron
2	56388401	56390400	2000	DUP	LOC101111526;LOC101120137	intergenic
2	65503201	65505200	2000	DUP	TRPM3	intron
2	78494001	78496000	2000	DEL	TRNAC-GCA;PTPRD	intergenic
2	78603201	78605600	2400	DEL	TRNAC-GCA;PTPRD	intergenic
2	79746401	79754800	8400	DEL	TRNAC-GCA;PTPRD	intergenic
2	79888001	79889600	1600	DUP	TRNAC-GCA;PTPRD	intergenic
2	79996801	79999200	2400	DEL	TRNAC-GCA;PTPRD	intergenic
2	80382001	80384000	2000	DEL	TRNAC-GCA;TYRP1	intergenic
2	80557201	80558800	1600	DEL	TRNAC-GCA;TYRP1	intergenic
2	83259601	83261600	2000	DUP	TTC39B	intron
2	87543601	87546400	2800	DUP	SLC24A2	intron
2	89255601	89257600	2000	DUP	LOC101106658;TP-1	intergenic
2	89265601	89267600	2000	DUP	TP-1;IFNE	intergenic
2	93523201	93524800	1600	DEL	TUSC1;LOC105608404	intergenic
2	95596401	95598000	1600	DEL	C2H9orf72;LINGO2	intergenic
2	97521601	97523600	2000	DEL	TRNAW-CCA;LINGO2	intergenic
2	98579601	98581600	2000	DUP	TRNAW-CCA;LOC101112287	intergenic
2	99753601	99756400	2800	DEL	LOC105608461;LOC105608475	intergenic
2	101744001	101745600	1600	DUP	FBXO16	intron
2	101746401	101750400	4000	DUP	FBXO16	intron
2	101790401	101793200	2800	DUP	FZD3	intron
2	101801201	101802800	1600	DUP	FZD3	intron
2	101808801	101812400	3600	DUP	FZD3	exon
2	105077201	105079200	2000	DEL	LOC106990533;GLRA3	intergenic
2	105081601	105090800	9200	DEL	LOC106990533;GLRA3	intergenic
2	105438401	105440000	1600	DEL	FBXO8;LOC106990444	intergenic
2	107312001	107314000	2000	DEL	GALNTL6	intron
2	108126001	108127600	1600	DEL	TRNAS-GGA;GALNTL6	intergenic
2	108624401	108626400	2000	DEL	TRNAS-GGA;GALNTL6	intergenic
2	111785601	111788400	2800	DUP	LOC101123441;LGSN	intergenic
2	111791201	111794800	3600	DUP	LOC101123441;LGSN	intergenic
2	112697201	112708000	10800	DEL	NIPA1;LOC101102534	intergenic
2	113737601	113742800	5200	DUP	FAM168B	intron
2	115052801	115054800	2000	DEL	LOC105608706;LOC105608719	intergenic
2	122139601	122144800	5200	DEL	LOC101122056;ZC3H15	intergenic
2	128929601	128931600	2000	DEL	CWC22	exon
2	130015201	130017200	2000	DUP	LOC101122330	exon
2	137471201	137473200	2000	DEL	TLK1	intron
2	142860001	142861600	1600	DUP	CSRNP3	intron
2	144267601	144270800	3200	DUP	GRB14;FIGN	intergenic
2	145345201	145352000	6800	DEL	FIGN;KCNH7	intergenic
2	145400401	145405600	5200	DUP	FIGN;KCNH7	intergenic
2	155135601	155137200	1600	DUP	TRNAC-ACA;GALNT13	intergenic
2	155546001	155547600	1600	DUP	TRNAC-ACA;GALNT13	intergenic
2	167453201	167455200	2000	DUP	LRP1B	intron
2	168336401	168338400	2000	DEL	LRP1B	intron
2	174570401	174572000	1600	DEL	RAB3GAP1	intron
2	174612001	174613600	1600	DEL	RAB3GAP1	intron
2	174615601	174617600	2000	DEL	RAB3GAP1	intron
2	174627601	174629600	2000	DEL	RAB3GAP1	intron
2	175281601	175283200	1600	DEL	MGAT5	intron
2	177874001	177876000	2000	DEL	LOC105609847;LOC106990967	intergenic
2	184170801	184172800	2000	DUP	PTPN4	intron
2	186493201	186495200	2000	DUP	TSN;TRNAC-GCA	intergenic
2	188204401	188206000	1600	DEL	TRNAC-GCA;CNTNAP5	intergenic
2	188207601	188211200	3600	DEL	TRNAC-GCA;CNTNAP5	intergenic
2	190718401	190720400	2000	DUP	TRNAW-CCA;LOC105609998	intergenic
2	190723601	190725200	1600	DUP	TRNAW-CCA;LOC105609998	intergenic
2	190770401	190772000	1600	DUP	TRNAW-CCA;LOC105609998	intergenic
2	191034401	191037200	2800	DEL	TRNAW-CCA;LOC105609998	intergenic
2	191160801	191163200	2400	DEL	TRNAW-CCA;LOC105609998	intergenic
2	191164001	191166000	2000	DEL	TRNAW-CCA;LOC105609998	intergenic
2	194708401	194710000	1600	DUP	LOC105610070;LOC106990202	intergenic
2	195334801	195338400	3600	DEL	LOC105610070;LOC106990202	intergenic
2	197748001	197750000	2000	DUP	HECW2	intron
2	199310801	199313200	2400	DEL	PLCL1	intron
2	200321601	200323600	2000	DEL	LOC106990596;SATB2	intergenic
2	200538401	200540000	1600	DUP	LOC106990596;SATB2	intergenic
2	202358401	202360000	1600	DEL	NDUFB3;CFLAR	intergenic
2	212933201	212936000	2800	DEL	ERBB4	intron
2	213671201	213675200	4000	DEL	LOC105611887;ERBB4	intergenic
2	216798001	216800400	2400	DEL	LOC105610593;MREG	intergenic
2	218460001	218461600	1600	DEL	LOC105606769;TNS1	intergenic
2	222254001	222255600	1600	DEL	TRNAS-GGA;EPHA4	intergenic
2	226452401	226455200	2800	DEL	DOCK10;NYAP2	intergenic
2	227716401	227722800	6400	DUP	LOC105610800;IRS1	intergenic
2	228964801	228970000	5200	DUP	CCL20;LOC101104046	intergenic
2	236329201	236331200	2000	DEL	LOC105608214;LOC105611135	intergenic
2	246980001	246982000	2000	DEL	LOC106990975;KLHDC7A	intergenic
3	94401	99200	4800	DEL	LOC101122774;LOC101123026	intergenic
3	790801	792800	2000	DUP	EXD3;TRAF2	intergenic
3	3554001	3555600	1600	DEL	PAEP	intron
3	3555601	3557600	2000	DUP	PAEP	intron
3	4890401	4892000	1600	DEL	RAPGEF1;MED27	intergenic
3	6303201	6304800	1600	DEL	NCS1	intron
3	7465201	7466800	1600	DUP	CCBL1;C3H9orf114	intergenic
3	11689601	11691200	1600	DUP	LHX2;DENND1A	intergenic
3	15508001	15509600	1600	DEL	TRNAC-GCA;LOC105614897	intergenic
3	24819201	24820800	1600	DEL	RAD51AP2;FAM49A	intergenic
3	25439601	25441600	2000	DUP	RAD51AP2;VSNL1	intergenic
3	31963601	31965600	2000	DUP	NCOA1	intron
3	35604001	35605600	1600	DUP	WDR43	intron
3	38798801	38800400	1600	DUP	GFPT1	exon
3	39187601	39189200	1600	DUP	LOC105613207	exon
3	39191601	39193200	1600	DUP	LOC105613207	exon
3	40176801	40179200	2400	DUP	TRNAS-GGA;ETAA1	intergenic
3	40181601	40183200	1600	DUP	TRNAS-GGA;ETAA1	intergenic
3	47079201	47081200	2000	DEL	C3H2orf74;LRRTM4	intergenic
3	52301601	52304000	2400	DEL	TRNAC-GCA;CTNNA2	intergenic
3	52704801	52706400	1600	DEL	TRNAC-GCA;CTNNA2	intergenic
3	53850401	53853600	3200	DEL	TRNAC-GCA;SUCLG1	intergenic
3	53896001	53898400	2400	DUP	TRNAC-GCA;SUCLG1	intergenic
3	55043601	55045600	2000	DEL	TRNAC-GCA;SUCLG1	intergenic
3	58450001	58452000	2000	DUP	KRCC1;CD8B	intergenic
3	59228801	59230400	1600	DUP	LOC105606419;PAX8	intergenic
3	67833601	67835600	2000	DEL	CCDC85A;EFEMP1	intergenic
3	69834401	69836000	1600	DUP	LOC105613853	intron
3	70598801	70600800	2000	DEL	LOC101112474;NRXN1	intergenic
3	76188401	76190400	2000	DUP	LOC101113750	intron
3	81286001	81288000	2000	DUP	MTA3	intron
3	82450801	82452800	2000	DUP	TRNAG-UCC;RPL10	intergenic
3	92937201	92942800	5600	DEL	PAIP2B;ZNF638	intergenic
3	96708001	96709600	1600	DEL	TACR1	intron
3	98602401	98604800	2400	DEL	LOC105612338;TMEM182	intergenic
3	103352001	103354000	2000	DUP	FAM178B	intron
3	105156401	105158000	1600	DUP	BCL2L11;LOC105611978	intergenic
3	106910801	106912800	2000	DEL	TSPAN8;ZC3H6	intergenic
3	111994401	111996400	2000	DUP	OSBPL8	exon
3	112439601	112441200	1600	DUP	CSRP2	exon
3	118954401	118956000	1600	DEL	LOC101104054;TMTC2	intergenic
3	119153601	119166400	12800	DUP	LOC101104054	intron
3	119169201	119174800	5600	DUP	LOC101104054	intron
3	119214001	119216000	2000	DUP	LOC101104054	intron
3	119873601	119875600	2000	DUP	LOC105614909;LOC105614910	intergenic
3	122742001	122744000	2000	DEL	MGAT4C	intron
3	123050001	123052000	2000	DEL	C3H12orf50;MGAT4C	intergenic
3	123216801	123218400	1600	DEL	C3H12orf50;MGAT4C	intergenic
3	125064401	125066400	2000	DUP	TRNAG-CCC;LOC105610274	intergenic
3	129288801	129291200	2400	DUP	LOC105614717;LOC105614718	intergenic
3	134642401	134644000	1600	DUP	DAZAP2	exon
3	136893601	136895600	2000	DEL	WNT10B;ARF3	intergenic
3	137274401	137276400	2000	DEL	LOC101122268	exon
3	137388801	137390800	2000	DEL	LOC101123028;LOC101123547	intergenic
3	137410401	137412000	1600	DEL	LOC101123547;LOC101101975	intergenic
3	141187601	141192400	4800	DEL	DBX2	intron
3	144195601	144197200	1600	DUP	PPHLN1	intron
3	145873201	145878000	4800	DEL	CNTN1	intron
3	146267601	146271200	3600	DUP	MUC19	exon
3	148347601	148349200	1600	DEL	TRNAS-GGA;PTPRR	intergenic
3	149308801	149310800	2000	DUP	LOC105611569;CNOT2	intergenic
3	150180801	150182400	1600	DEL	LOC101103962;LYZ	intergenic
3	157191601	157194000	2400	DEL	FAM19A2	intron
3	157198401	157201600	3200	DEL	FAM19A2	intron
3	158004001	158006800	2800	DEL	LOC106991000;FAM19A2	intergenic
3	158234001	158236400	2400	DUP	LOC106991000;FAM19A2	intergenic
3	158242001	158243600	1600	DUP	LOC106991000;FAM19A2	intergenic
3	158248001	158256800	8800	DUP	LOC106991000;FAM19A2	intergenic
3	159305601	159307600	2000	DUP	LOC106991000;SLC16A7	intergenic
3	160956401	160961200	4800	DEL	LOC105614768;LRIG3	intergenic
3	163382801	163388000	5200	DEL	LOC101106418;LOC101107184	intergenic
3	163416401	163420400	4000	DEL	LOC101106418;LOC101107184	intergenic
3	163886801	163888800	2000	DUP	LOC101111875;LOC101118006	intergenic
3	163917601	163920000	2400	DEL	LOC101111875;LOC101118006	intergenic
3	163988801	163992000	3200	DEL	LOC101118518;LOC101112895	intergenic
3	163994801	164006000	11200	DEL	LOC101118518;LOC101112895	intergenic
3	164008001	164011200	3200	DEL	LOC101118518;LOC101112895	intergenic
3	164312001	164316000	4000	DEL	LOC101115450;LOC101119808	intergenic
3	164316401	164322800	6400	DEL	LOC101115450;LOC101119808	intergenic
3	168630801	168634400	3600	DEL	ANKS1B	intron
3	175702001	175703600	1600	DEL	BTBD11	intron
3	177305201	177306800	1600	DEL	LOC105614803;LOC105608626	intergenic
3	177896401	177898000	1600	DUP	LOC105608626;TRNAR-CCU	intergenic
3	179218801	179222400	3600	DEL	LOC106991083;LOC101121414	intergenic
3	179228001	179230400	2400	DUP	LOC106991083;LOC101121414	intergenic
3	179232401	179235200	2800	DEL	LOC106991083;LOC101121414	intergenic
3	181220401	181225200	4800	DEL	SYT10;PKP2	intergenic
3	181226801	181246400	19600	DEL	SYT10;PKP2	intergenic
3	182064801	182068800	4000	DEL	BICD1	intron
3	183650801	183653600	2800	DEL	LOC105613668;IPO8	intergenic
3	186076001	186079200	3200	DEL	CCDC91	intron
3	188668401	188670400	2000	DEL	TRNAC-GCA;RASSF8	intergenic
3	189567201	189569200	2000	DEL	LOC105607108;LRMP	intergenic
3	195598401	195600400	2000	DUP	LOC101116645;CAPZA3	intergenic
3	197266801	197268800	2000	DUP	RERGL;LOC105613112	intergenic
3	197912801	197914400	1600	DUP	LMO3	exon
3	203162401	203165600	3200	DEL	LOC101120233;LOC101114093	intergenic
3	203433201	203435600	2400	DEL	LOC101122269;LOC106991007	intergenic
3	203499601	203501600	2000	DEL	LOC101122514;LOC101122777	intergenic
3	203803601	203806000	2400	DUP	LOC101116388	intron
3	203932001	203933600	1600	DUP	LOC105613001	intron
3	203972801	203978400	5600	DEL	LOC101123288;LOC101116896	intergenic
3	204506001	204507600	1600	DEL	LOC101120999	intron
3	204534401	204537200	2800	DEL	LOC101102973	intron
3	204539601	204542800	3200	DEL	LOC101102973	intron
3	205170401	205172800	2400	DEL	LOC101104482;LOC101122683	intergenic
3	205389601	205392400	2800	DUP	LOC101104740;LOC101122940	intergenic
3	205392801	205394800	2000	DUP	LOC101104740;LOC101122940	intergenic
3	205405601	205410000	4400	DUP	LOC101104740	intron
3	205414001	205418800	4800	DUP	LOC101104740	intron
3	205420801	205422800	2000	DUP	LOC101104740;LOC105614850	intergenic
3	205438401	205440000	1600	DUP	LOC105614850	intron
3	205441601	205461200	19600	DUP	LOC105614850	intron
3	206398401	206402400	4000	DUP	LOC106990118	intron
3	206445601	206447200	1600	DUP	LOC105608615	intron
3	206448801	206450800	2000	DUP	LOC105608615	intron
3	206675201	206677200	2000	DEL	LOC105608603	intron
3	206780801	206782400	1600	DUP	EM4B;LOC105614851	intergenic
3	206783601	206786800	3200	DUP	EM4B;LOC105614851	intergenic
3	206806801	206810400	3600	DUP	LOC105614851	intron
3	206811201	206813600	2400	DUP	LOC105614851	intron
3	206816801	206818400	1600	DUP	LOC105614851	intron
3	206820801	206823600	2800	DUP	LOC105614851	intron
3	206834401	206836400	2000	DUP	LOC105614851	exon
3	206846001	206848000	2000	DUP	LOC105614851	intron
3	206853201	206856400	3200	DUP	LOC100191064	intron
3	206857201	206860000	2800	DUP	LOC100191064	intron
3	213426001	213427600	1600	DEL	EIF3L	intron
3	217952401	217954000	1600	DUP	SCUBE1;MPPED1	intergenic
3	218477601	218479200	1600	DUP	SAMM50;PARVB	intergenic
3	220179201	220180800	1600	DEL	-	-
3	220187601	220190800	3200	DEL	-	-
3	220191601	220196800	5200	DEL	-	-
3	220200401	220202800	2400	DEL	-	-
3	220204401	220212400	8000	DEL	-	-
3	220212801	220273200	60400	DEL	-	-
3	220281201	220282800	1600	DEL	-	-
3	222854001	222855600	1600	DEL	LOC105610817;LOC101112390	intergenic
4	801	47600	46800	DEL	LOC106990711	intergenic
4	163201	220800	57600	DEL	LOC106990711;VSTM2A	intergenic
4	823601	826000	2400	DEL	TRNAC-GCA;VSTM2A	intergenic
4	1140801	1143200	2400	DEL	TRNAC-GCA;VSTM2A	intergenic
4	2371201	2373200	2000	DEL	LOC101106517;LOC105614180	intergenic
4	6314801	6316800	2000	DUP	LOC105614936;UPP1	intergenic
4	7504801	7507600	2800	DEL	LOC105614936;UPP1	intergenic
4	7543601	7545600	2000	DUP	LOC105614936;UPP1	intergenic
4	7593601	7596000	2400	DEL	UPP1;C4H7orf57	intergenic
4	8834401	8836400	2000	DEL	FZD1;LOC101113061	intergenic
4	10319201	10322000	2800	DUP	LOC106991118;CDK6	intergenic
4	10330001	10333600	3600	DUP	LOC101112306	exon
4	10348001	10350000	2000	DUP	LOC101112306	intron
4	15501201	15502800	1600	DEL	MIOS;COL28A1	intergenic
4	21868401	21870000	1600	DEL	TRNAC-GCA;ETV1	intergenic
4	26674801	26676800	2000	DEL	PRPS1L1;HDAC9	intergenic
4	27430001	27432800	2800	DUP	TRNAS-GGA;HDAC9	intergenic
4	29700401	29702000	1600	DUP	SP8;SP4	intergenic
4	30725601	30727600	2000	DUP	CDCA7L;RAPGEF5	intergenic
4	32841601	32845200	3600	DEL	LOC101122517	intron
4	35077201	35079200	2000	DEL	TRNAC-GCA;GRM3	intergenic
4	39416401	39418400	2000	DUP	LOC105614986;LOC105607851	intergenic
4	40868801	40870400	1600	DUP	GNAT3;GNAI1	intergenic
4	45009201	45011200	2000	DUP	RELN	intron
4	46891601	46894000	2400	DUP	ATXN7L1	intron
4	47536801	47538800	2000	DEL	NAMPT;PIK3CG	intergenic
4	49971601	49973200	1600	DEL	LOC105613812	intron
4	56152801	56154800	2000	DUP	DOCK4	intron
4	59148801	59152400	3600	DUP	DNAJB9;LOC105613666	intergenic
4	63600401	63602400	2000	DEL	BBS9	intron
4	64176001	64178000	2000	DUP	PDE1C	intron
4	72317601	72319600	2000	DEL	SRI;STEAP4	intergenic
4	72327601	72329600	2000	DEL	SRI;STEAP4	intergenic
4	72929201	72931600	2400	DEL	ZNF804B	intron
4	73357201	73359600	2400	DEL	ZNF804B	intron
4	75760801	75763200	2400	DEL	LOC105615056;IGFBP3	intergenic
4	75838001	75840000	2000	DEL	LOC105615056;IGFBP3	intergenic
4	82997601	83003200	5600	DEL	TRNAS-GGA;ANKRD7	intergenic
4	83004001	83006400	2400	DEL	TRNAS-GGA;ANKRD7	intergenic
4	83710001	83711600	1600	DEL	TRNAS-GGA;ANKRD7	intergenic
4	83712801	83715200	2400	DEL	TRNAS-GGA;ANKRD7	intergenic
4	83715601	83719600	4000	DEL	TRNAS-GGA;ANKRD7	intergenic
4	84740801	84742800	2000	DUP	KCND2	intron
4	88448801	88450800	2000	DEL	TMEM229A;GPR37	intergenic
4	89456401	89459200	2800	DEL	LOC101103150;LOC101102641	intergenic
4	89547601	89549200	1600	DUP	LOC101103150;LOC101102641	intergenic
4	94314401	94316400	2000	DEL	COPG2	intron
4	100090401	100092000	1600	DEL	CHRM2	intron
4	105295601	105297600	2000	DUP	LOC101116984;LOC101119040	intergenic
4	105301201	105302800	1600	DEL	LOC101116984;LOC101119040	intergenic
4	105308401	105310000	1600	DEL	LOC101116984;LOC101119040	intergenic
4	105315201	105318800	3600	DUP	LOC101116984;LOC101119040	intergenic
4	105914401	105929600	15200	DEL	LOC101122595	exon
4	106874401	106879600	5200	DEL	LOC105612482;LOC101119716	intergenic
4	106880801	106883200	2400	DEL	LOC105612482;LOC101119716	intergenic
4	106886801	106888400	1600	DEL	LOC105612482;LOC101119716	intergenic
4	108303601	108305600	2000	DUP	TRNAS-GGA;LOC105615127	intergenic
4	112218001	112220000	2000	DUP	LOC105614569;LOC105615133	intergenic
4	112226001	112228400	2400	DUP	LOC105614569;LOC105615133	intergenic
4	112229601	112231200	1600	DUP	LOC105614569;LOC105615133	intergenic
4	112232001	112236400	4400	DUP	LOC105614569;LOC105615133	intergenic
4	112237201	112239200	2000	DUP	LOC105614569	exon
4	112254001	112263200	9200	DUP	LOC101109441;LOC101122778	intergenic
4	112300401	112302800	2400	DEL	LOC101110230;LOC101122778	intergenic
4	112304401	112306400	2000	DEL	LOC101110230;LOC101122778	intergenic
4	112316001	112318000	2000	DEL	LOC101110230	exon
4	112323201	112326000	2800	DUP	LOC101110230;LOC101110502	intergenic
4	112337601	112339600	2000	DUP	LOC101110230;LOC101110502	intergenic
4	112350001	112353200	3200	DUP	LOC101123031	intron
4	112372001	112374000	2000	DEL	LOC101123031;LOC101123290	intergenic
4	112396801	112399200	2400	DUP	LOC101123031;LOC101123290	intergenic
4	112400001	112404400	4400	DUP	LOC101123031;LOC101123290	intergenic
4	112411201	112414000	2800	DUP	LOC101123290	exon
4	112420001	112422000	2000	DUP	LOC101123290;LOC105615175	intergenic
4	112426401	112428400	2000	DUP	LOC101123290;LOC105615175	intergenic
4	112430401	112432400	2000	DUP	LOC101123290;LOC105615175	intergenic
4	112433201	112440000	6800	DUP	LOC101123290;LOC105615175	intergenic
4	112456801	112458400	1600	DUP	LOC105601949;LOC105615175	intergenic
4	112479201	112480800	1600	DUP	LOC105601949;LOC105615175	intergenic
4	112513601	112515200	1600	DUP	LOC105601949;LOC105615175	intergenic
4	112521601	112523200	1600	DUP	LOC105601949;LOC105615175	intergenic
4	112523601	112526400	2800	DUP	LOC105601949;LOC105615175	intergenic
4	112527201	112529200	2000	DUP	LOC105601949;LOC105615175	intergenic
4	112530401	112532400	2000	DUP	LOC105601949;LOC105615175	intergenic
4	112533201	112535600	2400	DUP	LOC105601949;LOC105615175	intergenic
4	112538801	112541600	2800	DUP	LOC105601949;LOC105614177	intergenic
4	112554401	112557200	2800	DUP	LOC105601949;LOC105614177	intergenic
4	112572001	112574000	2000	DUP	LOC105601949;LOC105614177	intergenic
4	112589201	112594000	4800	DUP	LOC105601949;LOC105614177	intergenic
4	112600001	112602000	2000	DUP	LOC105614177;GIMAP2	intergenic
4	112606001	112612400	6400	DUP	LOC105614177;GIMAP2	intergenic
4	112709601	112711600	2000	DUP	LOC101102142	exon
4	113808801	113810400	1600	DUP	GALNTL5;LOC105615140	intergenic
4	114925601	114927600	2000	DUP	ACTR3B;DPP6	intergenic
4	115034801	115038000	3200	DEL	ACTR3B;DPP6	intergenic
4	118558801	118560800	2000	DUP	LOC105609743;NCAPG2	intergenic
5	842001	844000	2000	DEL	LOC105615179	intron
5	3329601	3331200	1600	DEL	LOC101103566;ZNF93	intergenic
5	3364001	3366000	2000	DEL	LOC101103566;ATP13A1	intergenic
5	3366401	3368400	2000	DEL	LOC101103566;ATP13A1	intergenic
5	3370801	3374400	3600	DEL	LOC101103566;ATP13A1	intergenic
5	3907201	3909200	2000	DUP	SLC25A42;ARMC6	intergenic
5	5688801	5690400	1600	DEL	HAUS8	intron
5	6523201	6524800	1600	DUP	AP1M1	intron
5	8063201	8065200	2000	DUP	LOC101104488;LOC101104746	intergenic
5	8636801	8638400	1600	DEL	LOC101112479;LOC101112979	intergenic
5	8639601	8643200	3600	DEL	LOC101112479;LOC101112979	intergenic
5	8644001	8646400	2400	DEL	LOC101112979	exon
5	8646801	8650000	3200	DEL	LOC101112979;LOC101113494	intergenic
5	8652001	8654000	2000	DEL	LOC101112979;LOC101113494	intergenic
5	8656001	8659200	3200	DEL	LOC101112979;LOC101113494	intergenic
5	8670001	8671600	1600	DEL	LOC101112979;LOC101113494	intergenic
5	8677201	8680000	2800	DEL	LOC101112979;LOC101113494	intergenic
5	8683201	8684800	1600	DEL	LOC101112979;LOC101113494	intergenic
5	8685601	8687600	2000	DEL	LOC101112979;LOC101113494	intergenic
5	8688001	8689600	1600	DEL	LOC101112979;LOC101113494	intergenic
5	8928001	8929600	1600	DEL	LOC101116053;LOC101116313	intergenic
5	8942001	8944000	2000	DEL	LOC101116053;LOC101116313	intergenic
5	11158401	11160000	1600	DUP	LOC101103644	intron
5	11696001	11700400	4400	DEL	LOC101111632;LOC101111882	intergenic
5	11705601	11707600	2000	DEL	LOC101111882;LOC101112395	intergenic
5	11719201	11721200	2000	DEL	LOC101111882;LOC101112395	intergenic
5	11724801	11727600	2800	DEL	LOC101111882;LOC101112395	intergenic
5	11733601	11754000	20400	DEL	LOC101111882;LOC101112395	intergenic
5	11759201	11761600	2400	DEL	LOC101111882;LOC101112395	intergenic
5	11888401	11890400	2000	DEL	LOC105615213	intron
5	12791601	12793200	1600	DUP	ILF3;QTRT1	intergenic
5	15017601	15019600	2000	DEL	LOC101106326;LOC101106588	intergenic
5	21428401	21430400	2000	DEL	LOC101104062;CHSY3	intergenic
5	21822001	21824000	2000	DEL	LOC105608691;CHSY3	intergenic
5	24936001	24938400	2400	DEL	LOC105615237	intron
5	25543201	25544800	1600	DEL	LOC105615237;LOC105615239	intergenic
5	26157201	26161600	4400	DEL	LOC105615239	intron
5	26957201	26958800	1600	DEL	LOC105611654;LOC105611655	intergenic
5	31324001	31325600	1600	DEL	FAM170A;PRR16	intergenic
5	31363201	31364800	1600	DEL	FAM170A;PRR16	intergenic
5	33108001	33110800	2800	DEL	LOC105611204	intron
5	33111201	33113200	2000	DEL	LOC105611204	intron
5	34474801	34476400	1600	DUP	LOC105611207;LOC105611204	intergenic
5	37918801	37920400	1600	DUP	LOC105614551	intron
5	38623601	38625200	1600	DEL	LOC101115539;LOC101115794	intergenic
5	38824401	38826400	2000	DEL	LOC101117585;LOC101117843	intergenic
5	38970401	38972000	1600	DEL	LOC101118610;LOC101118872	intergenic
5	39130401	39133600	3200	DEL	LOC101119903;LOC101120163	intergenic
5	49255601	49257200	1600	DUP	LOC105615370;LOC105615369	intergenic
5	49257201	49258800	1600	DUP	LOC105615370	exon
5	49260001	49261600	1600	DUP	LOC105615370;LOC106991169	intergenic
5	49266001	49268800	2800	DUP	LOC106991169;LOC106991170	intergenic
5	49272801	49274400	1600	DUP	LOC106991170	intron
5	53464801	53466800	2000	DUP	TRNAC-GCA;KCTD16	intergenic
5	61971201	61972800	1600	DEL	NMUR2;GRIA1	intergenic
5	61974001	61975600	1600	DEL	NMUR2;GRIA1	intergenic
5	70907601	70910400	2800	DEL	GABRA1;GABRG2	intergenic
5	71185601	71187200	1600	DEL	TRNAS-GGA;GABRG2	intergenic
5	74299201	74300800	1600	DEL	TRNAC-GCA;LOC106990422	intergenic
5	81943201	81952400	9200	DEL	TRNAW-CCA;LOC105606733	intergenic
5	83848401	83850000	1600	DEL	TRNAC-GCA;LOC105607449	intergenic
5	88360801	88363600	2800	DEL	LOC105607622	intron
5	93264801	93266800	2000	DUP	TRNAW-CCA;CAST	intergenic
5	93285201	93286800	1600	DUP	TRNAW-CCA;CAST	intergenic
5	97140801	97144400	3600	DUP	FAM174A;ST8SIA4	intergenic
5	97697601	97699600	2000	DUP	TRNAC-GCA;LOC105609305	intergenic
5	98205201	98209200	4000	DEL	TRNAC-GCA;LOC105609305	intergenic
5	105593201	105594800	1600	DUP	PJA2	intron
5	107829601	107833600	4000	DUP	STARD4	intergenic
6	169201	170800	1600	DUP	APELA	intergenic
6	996801	998400	1600	DEL	LOC105613737;MARCH1	intergenic
6	1333201	1337200	4000	DEL	LOC105613737;MARCH1	intergenic
6	2461601	2463200	1600	DEL	TKTL2;NPY5R	intergenic
6	3340401	3345200	4800	DUP	NAF1;BBS7	intergenic
6	5395601	5397200	1600	DEL	MAD2L1;PRDM5	intergenic
6	5635601	5644800	9200	DUP	MAD2L1;PDE5A	intergenic
6	6996801	6998800	2000	DUP	PRSS12	intron
6	9676001	9679200	3200	DEL	LOC105612939;LOC105613665	intergenic
6	9682801	9684400	1600	DEL	LOC105612939;LOC105613665	intergenic
6	9886401	9888000	1600	DEL	LOC105612939;LOC105613665	intergenic
6	11188001	11193600	5600	DEL	TRNAK-CUU;UGT8	intergenic
6	11322801	11324800	2000	DEL	TRNAK-CUU;UGT8	intergenic
6	12634401	12636400	2000	DEL	ANK2	intron
6	17757601	17760000	2400	DEL	LOC106991223;TRNAS-GGA	intergenic
6	18624401	18626400	2000	DUP	GIMD1;DKK2	intergenic
6	18627201	18628800	1600	DUP	GIMD1;DKK2	intergenic
6	20204001	20206000	2000	DEL	LOC105612165;CXXC4	intergenic
6	22057601	22059600	2000	DEL	UBE2D3	intron
6	23447601	23449600	2000	DEL	LOC105615429;PPP3CA	intergenic
6	25187201	25189200	2000	DEL	LOC101111713	intron
6	26641601	26643600	2000	DEL	PDHA2;LOC106990267	intergenic
6	26847201	26848800	1600	DEL	PDHA2;LOC106990267	intergenic
6	28698001	28702400	4400	DUP	PDHA2;UNC5C	intergenic
6	30160401	30162000	1600	DEL	HPGDS;PDLIM5	intergenic
6	30162401	30165200	2800	DEL	HPGDS;PDLIM5	intergenic
6	31753601	31755600	2000	DEL	GRID2	intron
6	35018401	35020400	2000	DUP	SNCA;GPRIN3	intergenic
6	47082401	47084000	1600	DEL	LOC101106847;LOC105612659	intergenic
6	47086401	47089200	2800	DEL	LOC101106847;LOC105612659	intergenic
6	50062801	50064800	2000	DEL	PCDH7	intron
6	50688001	50689600	1600	DEL	TRNAC-GCA;PCDH7	intergenic
6	51396401	51399200	2800	DEL	TRNAC-GCA;PCDH7	intergenic
6	51403201	51404800	1600	DEL	TRNAC-GCA;PCDH7	intergenic
6	52655601	52657200	1600	DEL	TRNAC-GCA;TRNAC-GCA	intergenic
6	52661201	52663200	2000	DEL	TRNAC-GCA;TRNAC-GCA	intergenic
6	54976001	54979600	3600	DEL	TRNAC-GCA;ARAP2	intergenic
6	58892801	58894800	2000	DUP	PDS5A	intron
6	61419201	61422000	2800	DEL	ATP8A1;GRXCR1	intergenic
6	61422801	61428000	5200	DEL	ATP8A1;GRXCR1	intergenic
6	61556001	61558000	2000	DEL	ATP8A1;GRXCR1	intergenic
6	66445601	66451600	6000	DUP	CORIN	intron
6	66757201	66759200	2000	DEL	TEC	intron
6	71738001	71740000	2000	DUP	LOC105615499	intron
6	73795201	73796800	1600	DEL	TRNAC-GCA;ADGRL3	intergenic
6	73995201	73996800	1600	DEL	TRNAC-GCA;ADGRL3	intergenic
6	74129601	74132400	2800	DEL	TRNAC-GCA;ADGRL3	intergenic
6	74134801	74136400	1600	DEL	TRNAC-GCA;ADGRL3	intergenic
6	74342801	74344800	2000	DEL	TRNAC-GCA;ADGRL3	intergenic
6	74348401	74354000	5600	DEL	TRNAC-GCA;ADGRL3	intergenic
6	80087201	80088800	1600	DUP	TECRL;EPHA5	intergenic
6	84131601	84133200	1600	DUP	UGT2B7;LOC105614163	intergenic
6	84355601	84357600	2000	DEL	LOC101118447;LOC101122788	intergenic
6	84360801	84363200	2400	DEL	LOC101118447;LOC101122788	intergenic
6	84364401	84366400	2000	DEL	LOC101118447;LOC101122788	intergenic
6	84501601	84504000	2400	DUP	LOC101122788	intron
6	84506801	84508800	2000	DUP	LOC101122788	intron
6	84512001	84514400	2400	DUP	LOC101122788	intron
6	84712001	84714000	2000	DEL	UGT2A1	intron
6	84776001	84778800	2800	DEL	UGT2A1;SULT1B1	intergenic
6	100143201	100145200	2000	DEL	ARHGAP24	intron
6	102130801	102132800	2000	DEL	LOC106991241;PPP2R2C	intergenic
6	102442001	102444000	2000	DUP	WFS1	intron
6	102543601	102545200	1600	DUP	LOC101112981;JAKMIP1	intergenic
6	109705601	109708000	2400	DEL	CPEB2;C1QTNF7	intergenic
6	110336001	110345200	9200	DUP	BST1	intron
6	110351201	110366000	14800	DUP	-	-
6	110374001	110380800	6800	DUP	-	-
6	110592401	110594000	1600	DEL	PROM1	intron
6	110596001	110597600	1600	DEL	PROM1	intron
6	110602401	110605200	2800	DEL	PROM1	intron
6	110606001	110609200	3200	DEL	PROM1	intron
6	112427201	112429200	2000	DUP	LOC101108390;BLOC1S4	intergenic
6	113054001	113056000	2000	DEL	SORCS2	intron
6	114465601	114467600	2000	DUP	ADRA2C;LOC105615584	intergenic
6	114686001	114688400	2400	DUP	LOC106991219;HGFAC	intergenic
6	115468801	115470400	1600	DUP	RNF4	exon
6	116692001	116694000	2000	DUP	LOC105601929;PCGF3	intergenic
7	801	2400	1600	DUP	TRNAK-UUU	intergenic
7	94401	96800	2400	DUP	TRNAK-UUU	intergenic
7	125601	127200	1600	DEL	TRNAK-UUU	intergenic
7	3628001	3630000	2000	DUP	TRIM36;KCNN2	intergenic
7	4918001	4920000	2000	DUP	THOC3;LOC106990212	intergenic
7	6344001	6345600	1600	DEL	ANKRD31	intron
7	9902001	9905200	3200	DEL	LOC101108575	intron
7	11279201	11281200	2000	DEL	ERO1A	intron
7	19935601	19937600	2000	DEL	REC114	intron
7	21640801	21642400	1600	DUP	LOC101105503	intron
7	22135201	22136800	1600	DEL	-	-
7	22316001	22324400	8400	DUP	-	-
7	22325601	22337600	12000	DUP	-	-
7	22342401	22354400	12000	DUP	-	-
7	22357201	22360000	2800	DEL	-	-
7	22362801	22364400	1600	DEL	-	-
7	22365201	22369200	4000	DUP	-	-
7	22376801	22378800	2000	DUP	-	-
7	22383201	22392400	9200	DUP	-	-
7	22394001	22395600	1600	DUP	-	-
7	22396001	22398000	2000	DUP	-	-
7	22401601	22410800	9200	DUP	-	-
7	22423201	22425200	2000	DUP	-	-
7	22427601	22431600	4000	DUP	-	-
7	22432801	22435600	2800	DUP	-	-
7	22436001	22438400	2400	DUP	-	-
7	22440801	22442400	1600	DUP	-	-
7	22447201	22448800	1600	DUP	-	-
7	22496801	22505200	8400	DUP	-	-
7	22505601	22514400	8800	DUP	-	-
7	22518001	22526800	8800	DUP	-	-
7	22537201	22541600	4400	DUP	-	-
7	22545201	22548400	3200	DUP	-	-
7	22551201	22558400	7200	DUP	-	-
7	22560801	22565200	4400	DUP	-	-
7	22566801	22568800	2000	DUP	-	-
7	22569201	22685200	116000	DUP	LOC106991256	exon
7	22721601	22723200	1600	DUP	LOC101113153;LOC101113415	intergenic
7	22726401	22729600	3200	DUP	LOC101113153;LOC101113415	intergenic
7	22732001	22735200	3200	DUP	LOC101113415;LOC101106775	intergenic
7	22762401	22764400	2000	DUP	LOC101113415;LOC101106775	intergenic
7	22770401	22772000	1600	DUP	LOC101106775;LOC101113680	intergenic
7	23719201	23722800	3600	DUP	RNASE10;LOC105613766	intergenic
7	24351601	24353200	1600	DEL	LOC101123383;LOC101117508	intergenic
7	24356001	24358000	2000	DEL	LOC101123383;LOC101117508	intergenic
7	30015601	30017200	1600	DUP	LOC105610620;TMCO5A	intergenic
7	32154801	32156800	2000	DEL	LOC101106173;THBS1	intergenic
7	33772801	33774800	2000	DUP	LOC105615677	exon
7	38073601	38076400	2800	DEL	TRNAC-ACA;LOC105613304	intergenic
7	53902801	53907600	4800	DEL	TRNAW-CCA;TRNAC-GCA	intergenic
7	58976001	58977600	1600	DUP	DUT;FBN1	intergenic
7	60667201	60668800	1600	DEL	LOC101113241;SEMA6D	intergenic
7	61356001	61357600	1600	DUP	LOC101113241;SEMA6D	intergenic
7	61532401	61534800	2400	DEL	LOC101113241;SEMA6D	intergenic
7	65324001	65326000	2000	DEL	LOC105612959;LOC106991285	intergenic
7	66612801	66614400	1600	DEL	LOC106991261	intron
7	70828801	70831200	2400	DEL	LOC101118878;SNAPC1	intergenic
7	71239601	71241600	2000	DEL	LOC106991288;KCNH5	intergenic
7	71684401	71686800	2400	DEL	LOC106991288;KCNH5	intergenic
7	71687601	71690000	2400	DEL	LOC106991288;KCNH5	intergenic
7	83847601	83849600	2000	DEL	TTLL5	intron
7	85441201	85444400	3200	DUP	GSTZ1;TMED8	intergenic
7	85959601	85961200	1600	DUP	ADCK1	intron
7	93776401	93778000	1600	DEL	TRNAK-UUU;FLRT2	intergenic
7	96980401	96982800	2400	DEL	SPATA7;PTPN21	intergenic
7	97819601	97821200	1600	DUP	FOXN3	intron
7	99945201	99953600	8400	DUP	C7H15orf43	intron
8	825601	827600	2000	DEL	CD109;LOC105612327	intergenic
8	997201	1001600	4400	DEL	CD109;LOC105612327	intergenic
8	2211201	2215200	4000	DUP	FILIP1	intron
8	2218801	2228000	9200	DUP	FILIP1	exon
8	2228401	2236000	7600	DUP	FILIP1	intron
8	2236801	2242000	5200	DUP	FILIP1	intron
8	2243201	2247200	4000	DUP	FILIP1	intron
8	2248801	2250800	2000	DUP	FILIP1	intron
8	2252001	2256400	4400	DUP	FILIP1	intron
8	2260001	2268000	8000	DUP	FILIP1	intron
8	2269201	2271200	2000	DUP	FILIP1	intron
8	2272401	2274000	1600	DUP	FILIP1	intron
8	2274401	2276400	2000	DUP	FILIP1	intron
8	2278401	2283600	5200	DUP	FILIP1	intron
8	2287601	2430400	142800	DUP	SENP6	exon
8	3914401	3916800	2400	DEL	HTR1B;IMPG1	intergenic
8	7822401	7829200	6800	DEL	FAM46A;BCKDHB	intergenic
8	13404401	13406000	1600	DEL	TRNAC-ACA;NKAIN2	intergenic
8	16330801	16334000	3200	DUP	LOC105615953;LOC105612144	intergenic
8	17333601	17335600	2000	DEL	LOC101122794;TBC1D32	intergenic
8	29300001	29302000	2000	DEL	SEC63;SCML4	intergenic
8	34992001	34994000	2000	DEL	GRIK2	intron
8	36366001	36368000	2000	DUP	ASCC3	intron
8	41042401	41044000	1600	DEL	TRNAC-GCA;LOC105612960	intergenic
8	46824801	46826400	1600	DUP	MAP3K7	exon
8	51272001	51274000	2000	DEL	LOC105611298;NT5E	intergenic
8	57704401	57706400	2000	DEL	LOC101103241;LOC101119225	intergenic
8	70453201	70456000	2800	DEL	GRM1	intron
8	71976401	71978400	2000	DUP	SASH1	intron
8	73783201	73786400	3200	DUP	LRP11;LOC101105006	intergenic
8	73786801	73792000	5200	DUP	LRP11;LOC101105006	intergenic
8	73796401	73799200	2800	DUP	LRP11;LOC101105006	intergenic
8	73802801	73804800	2000	DUP	LRP11;LOC101105006	intergenic
8	73806001	73808400	2400	DUP	LOC101105006	exon
8	73810401	73822000	11600	DUP	LOC101105006;LOC101105258	intergenic
8	81307601	81311200	3600	DEL	GTF2H5;TULP4	intergenic
9	12401	14800	2400	DUP	LOC105615961;LOC105613741	intergenic
9	16001	22400	6400	DUP	LOC105615961;LOC105613741	intergenic
9	81601	83600	2000	DUP	LOC105615961;LOC105613741	intergenic
9	252401	258400	6000	DUP	LOC101121783;LOC105616106	intergenic
9	428801	430800	2000	DUP	LOC105616107;DDX43	intergenic
9	474801	476400	1600	DUP	LOC105616107;DDX43	intergenic
9	4755601	4757200	1600	DUP	LMBRD1	intron
9	5286801	5288400	1600	DEL	ADGRB3	intron
9	6728401	6730000	1600	DUP	TRNAS-GGA;ADGRB3	intergenic
9	6995201	7000800	5600	DEL	TRNAS-GGA;ADGRB3	intergenic
9	7656801	7660800	4000	DEL	TRNAS-GGA;ADGRB3	intergenic
9	7661601	7664400	2800	DEL	TRNAS-GGA;ADGRB3	intergenic
9	7672801	7676800	4000	DEL	TRNAS-GGA;ADGRB3	intergenic
9	7678001	7687600	9600	DEL	TRNAS-GGA;ADGRB3	intergenic
9	7689201	7691600	2400	DEL	TRNAS-GGA;ADGRB3	intergenic
9	8354001	8356400	2400	DEL	TRNAS-GGA;ADGRB3	intergenic
9	10942001	10944400	2400	DEL	EYS;PHF3	intergenic
9	12272001	12278000	6000	DUP	EYS;PHF3	intergenic
9	12319201	12321200	2000	DEL	EYS;PHF3	intergenic
9	13046001	13053600	7600	DUP	LOC106991342;LOC105612928	intergenic
9	13058801	13060800	2000	DUP	LOC106991342;LOC105612928	intergenic
9	13062001	13064400	2400	DUP	LOC106991342;LOC105612928	intergenic
9	13065601	13067600	2000	DUP	LOC105612928	intron
9	13068801	13071200	2400	DUP	LOC105612928	intron
9	13073601	13077600	4000	DUP	LOC105612928	intron
9	13434801	13437200	2400	DUP	SLC39A4;CPSF1	intergenic
9	14320001	14321600	1600	DEL	LOC101116324;LOC101118536	intergenic
9	18953601	18955600	2000	DUP	LOC106991337;LOC105611114	intergenic
9	22096401	22098000	1600	DEL	EFR3A	intron
9	25910401	25912000	1600	DUP	LOC106991345;LOC106991346	intergenic
9	26549601	26551600	2000	DUP	LOC106991346;LOC105614550	intergenic
9	26554001	26557600	3600	DEL	LOC106991346;LOC105614550	intergenic
9	26560001	26562000	2000	DEL	LOC106991346;LOC105614550	intergenic
9	26563601	26566400	2800	DEL	LOC106991346;LOC105614550	intergenic
9	30200001	30202000	2000	DEL	LOC101110341;ZHX2	intergenic
9	31795201	31796800	1600	DUP	LOC101104671;LOC105609191	intergenic
9	32703601	32705600	2000	DEL	SNAI2;C9H8orf22	intergenic
9	35096401	35100000	3600	DUP	LOC101114620	intron
9	39479601	39481200	1600	DUP	LOC105616033	exon
9	42706801	42708800	2000	DUP	ARMC1	exon
9	46155201	46156800	1600	DUP	SLCO5A1	exon
9	46297201	46299600	2400	DEL	SLCO5A1	intron
9	50499201	50500800	1600	DUP	PI15;GDAP1	intergenic
9	53261201	53263200	2000	DUP	PEX2;LOC105613955	intergenic
9	62568401	62570000	1600	DEL	TRNAW-CCA;TRNAC-GCA	intergenic
9	63259601	63261200	1600	DEL	TRNAW-CCA;TRNAC-GCA	intergenic
9	67233601	67235200	1600	DEL	KCNV1;SYBU	intergenic
9	73530001	73534000	4000	DEL	DCAF13	intron
9	74119601	74122000	2400	DUP	AZIN1	exon
9	76419601	76421600	2000	DUP	ANKRD46;LOC105609920	intergenic
9	81021201	81028400	7200	DEL	TRNAG-CCC;TRNAW-CCA	intergenic
9	85854801	85857600	2800	DEL	LOC105609758;TMEM55A	intergenic
9	85881201	85883200	2000	DEL	LOC105609758;TMEM55A	intergenic
9	89610401	89613200	2800	DUP	CA3;LOC101113601	intergenic
9	89619201	89626000	6800	DUP	LOC101113601	intron
9	89627601	89633600	6000	DUP	LOC101113601;LOC101113860	intergenic
9	89634801	89636800	2000	DUP	LOC101113601;LOC101113860	intergenic
9	89637601	89640800	3200	DEL	LOC101113601;LOC101113860	intergenic
9	89641601	89649200	7600	DUP	LOC101113601;LOC101113860	intergenic
9	89649601	89652800	3200	DUP	LOC101113601;LOC101113860	intergenic
9	90960801	90962800	2000	DUP	LOC105610835	intron
9	90964801	90966400	1600	DUP	LOC105610835	intron
9	92562401	92564400	2000	DEL	LOC101118963;LOC106990576	intergenic
9	93898401	93900000	1600	DUP	COL14A1	intron
9	94568401	94570000	1600	DUP	SNTB1	intergenic
10	126801	130000	3200	DUP	LOC101118284;PCDH20	intergenic
10	132801	136000	3200	DUP	LOC101118284;PCDH20	intergenic
10	407201	408800	1600	DEL	LOC101118284;PCDH20	intergenic
10	538401	540000	1600	DEL	LOC101118284;PCDH20	intergenic
10	546001	548000	2000	DEL	LOC101118284;PCDH20	intergenic
10	562401	564000	1600	DEL	LOC101118284;PCDH20	intergenic
10	1842801	1844800	2000	DUP	TDRD3	intron
10	2210801	2212400	1600	DEL	TDRD3;DIAPH3	intergenic
10	3434001	3436000	2000	DUP	LOC105612615;LOC105616123	intergenic
10	4898801	4901200	2400	DEL	LOC105612615;LOC105616123	intergenic
10	5165601	5167600	2000	DUP	LOC105616123;PCDH17	intergenic
10	6792401	6794800	2400	DEL	LOC105610339;PCDH17	intergenic
10	9479201	9481600	2400	DEL	LOC105610339;PCDH17	intergenic
10	17493201	17494800	1600	DEL	SUCLA2;HTR2A	intergenic
10	20278401	20280400	2000	DEL	LOC105608015;LOC105608016	intergenic
10	23922801	23924800	2000	DEL	UFM1;FREM2	intergenic
10	26672001	26673600	1600	DEL	LOC105611533	intron
10	28602801	28604400	1600	DEL	PDS5B	intron
10	36086001	36087600	1600	DUP	IFT88	intron
10	36266001	36267600	1600	DUP	GJA3;GJB2	intergenic
10	38112801	38116400	3600	DEL	ATP12A;PCDH9	intergenic
10	38120801	38122400	1600	DEL	ATP12A;PCDH9	intergenic
10	38393601	38395200	1600	DEL	ATP12A;PCDH9	intergenic
10	39958001	39960400	2400	DEL	PCDH9	intron
10	40414401	40416400	2000	DUP	PCDH9	intron
10	41234001	41236000	2000	DEL	TRNAW-CCA;PCDH9	intergenic
10	44632001	44634000	2000	DEL	KLHL1	intron
10	44864401	44866000	1600	DUP	KLHL1	intron
10	48440001	48442000	2000	DEL	LOC106991372;KLF12	intergenic
10	55928401	55930000	1600	DEL	LOC105607734	intron
10	56500801	56502800	2000	DUP	LOC101105339;SLITRK1	intergenic
10	62068001	62070400	2400	DUP	TRNAR-CCU;TRNAQ-CUG	intergenic
10	62850801	62852800	2000	DEL	MIR17;SLITRK5	intergenic
10	65339601	65341600	2000	DEL	MIR17;SLITRK5	intergenic
10	67046801	67048400	1600	DEL	GPC5	intron
10	70270001	70272800	2800	DEL	LOC101106781	intron
10	70308401	70313200	4800	DEL	LOC101106781	intron
10	70314401	70316000	1600	DEL	LOC101106781	intron
10	70316801	70322000	5200	DEL	LOC101106781	intron
10	70380801	70384000	3200	DEL	LOC101106781	intron
10	70400401	70402400	2000	DEL	LOC101106781	intron
10	70411201	70417600	6400	DEL	LOC101106781	intron
10	70422401	70426000	3600	DEL	LOC101106781	intron
10	70513201	70519200	6000	DUP	LOC101107030	intron
10	70519601	70681600	162000	DUP	LOC101107030	intron
10	70694001	70696800	2800	DEL	LOC106991387	intron
10	70707601	70709200	1600	DEL	LOC106991387	intron
10	70709601	70724400	14800	DEL	LOC106991387	exon
10	70729201	70738000	8800	DEL	LOC106991387	intron
10	70743601	70745600	2000	DEL	LOC106991387	intron
10	70746801	70748400	1600	DEL	LOC106991387	intron
10	70749601	70752000	2400	DEL	LOC106991387	intron
10	70753201	70758000	4800	DEL	LOC106991387;LOC106991366	intergenic
10	70768801	70770400	1600	DUP	LOC106991387;LOC106991366	intergenic
10	70771601	70780400	8800	DUP	LOC106991366	intron
10	70787601	70791200	3600	DUP	LOC106991366	intron
10	70796801	70802000	5200	DUP	LOC106991366	intron
10	70809201	70834400	25200	DUP	LOC105616215	intron
10	70842001	70856400	14400	DUP	LOC105616215;LOC105601928	intergenic
10	70861201	70866800	5600	DUP	LOC105616215;LOC105601928	intergenic
10	70870001	70871600	1600	DUP	LOC105616215;LOC105601928	intergenic
10	70874401	70876400	2000	DUP	LOC105616215;LOC105601928	intergenic
10	70901601	70905200	3600	DUP	LOC105601928	intron
10	70917601	70920400	2800	DUP	LOC105601928	intron
10	70926001	70927600	1600	DUP	LOC105601928	intron
10	70930001	70932000	2000	DUP	LOC105601928	intron
10	70932801	71038400	105600	DUP	LOC105601928	intron
10	71040001	71042800	2800	DEL	LOC105601928	intron
10	71047201	71049200	2000	DUP	LOC105613864	intron
10	71053201	71056800	3600	DEL	LOC105613864	intron
10	71062001	71068400	6400	DEL	LOC105613864	intron
10	71070001	71086000	16000	DEL	LOC105613864	intron
10	71099601	71103200	3600	DEL	LOC105613864	intron
10	71103201	71106800	3600	DUP	LOC105613864	exon
10	71111601	71175200	63600	DUP	LOC105616214	exon
10	71178801	71180400	1600	DEL	LOC105601928	intron
10	71181601	71184400	2800	DEL	LOC105601928	intron
10	71186401	71190400	4000	DEL	LOC105601928	intron
10	71195201	71198400	3200	DEL	LOC105601928	intron
10	71199601	71201600	2000	DEL	LOC105601928	intron
10	71202001	71252800	50800	DEL	LOC105601928	intron
10	71252401	71254400	2000	DUP	LOC105601928;LOC105614203	intergenic
10	71255201	71260400	5200	DUP	LOC105601928;LOC105614203	intergenic
10	71264401	71266400	2000	DUP	LOC105601928;LOC105614203	intergenic
10	71267601	71269600	2000	DUP	LOC105601928;LOC105614203	intergenic
10	71271601	71278800	7200	DUP	LOC105601928;LOC105614203	intergenic
10	71283601	71289600	6000	DUP	LOC105601928;LOC105614203	intergenic
10	71291601	71295200	3600	DUP	LOC105614203	exon
10	71297201	71304400	7200	DEL	LOC105614203	intron
10	71306801	71309200	2400	DEL	LOC105614203	intron
10	71310001	71312800	2800	DUP	LOC105614203	intron
10	71314401	71316400	2000	DUP	LOC105616213;LOC105614203	intergenic
10	71316801	71318800	2000	DUP	LOC105616213;LOC105614203	intergenic
10	71318401	71320400	2000	DEL	LOC105616213;LOC105614203	intergenic
10	71564401	71566000	1600	DUP	LOC105616212;LOC101108321	intergenic
10	71596801	71600000	3200	DUP	LOC106991389	intron
10	71609201	71611600	2400	DUP	LOC105601884	intron
10	71621601	71623200	1600	DUP	LOC105601884;LOC101109105	intergenic
10	71626001	71630400	4400	DUP	LOC105601884;LOC101109105	intergenic
10	71632401	71634400	2000	DUP	LOC105601884;LOC101109105	intergenic
10	71644801	71646400	1600	DUP	LOC101109105	exon
10	71646801	71662400	15600	DEL	LOC101109105	intron
10	71666401	71680400	14000	DEL	LOC101109105	intron
10	71683201	71685600	2400	DEL	LOC101109105	intron
10	71687201	71689200	2000	DEL	LOC101109105	intron
10	71690801	71696000	5200	DEL	LOC101109105	intron
10	71697201	71699600	2400	DEL	LOC101109105	intron
10	71708801	71712400	3600	DEL	LOC101109105	intron
10	71716401	71718000	1600	DUP	LOC101109105	intron
10	71721601	71723200	1600	DUP	LOC101109105	exon
10	71725201	71742000	16800	DEL	LOC101109105	intron
10	71754001	71757200	3200	DEL	LOC101109105;LOC101109370	intergenic
10	71792801	71795200	2400	DUP	LOC101109370	intron
10	71869201	71870800	1600	DUP	LOC101109370	intron
10	71887601	71889200	1600	DUP	LOC101109370;LOC101109626	intergenic
10	71904801	71907600	2800	DUP	LOC101109370;LOC101109626	intergenic
10	71920401	71922400	2000	DUP	LOC101109626	intron
10	71928801	71930400	1600	DUP	LOC101109626	intron
10	71984801	71988800	4000	DEL	LOC101109626	intron
10	72000001	72002000	2000	DEL	LOC101109626	intron
10	72008401	72010400	2000	DEL	LOC101109626	intron
10	72014401	72016000	1600	DEL	LOC101109626	intron
10	72025201	72028400	3200	DEL	LOC101109626	intron
10	72075601	72077200	1600	DEL	LOC101109626	intron
10	72080401	72083600	3200	DEL	LOC101109626	intron
10	72086001	72089200	3200	DEL	LOC101109626	exon
10	72092401	72096400	4000	DEL	LOC101109890;LOC101109626	intergenic
10	72111601	72114000	2400	DUP	LOC101109890	intron
10	72115201	72117600	2400	DUP	LOC101109890	intron
10	72124401	72126000	1600	DUP	LOC101109890	intron
10	72127201	72134000	6800	DUP	LOC101109890	intron
10	72138401	72140000	1600	DUP	LOC101109890	intron
10	72141601	72145200	3600	DUP	LOC101109890	intron
10	72149201	72151200	2000	DUP	LOC101109890	intron
10	72178801	72182800	4000	DUP	LOC101109890;CLDN10	intergenic
10	75041601	75043200	1600	DUP	DOCK9	intron
10	78315201	78317200	2000	DEL	BIVM	intron
10	82307201	82309200	2000	DEL	FAM155A	intron
11	4001	10000	6000	DUP	CA10	intergenic
11	38801	40800	2000	DUP	CA10	intergenic
11	92801	94400	1600	DEL	CA10	intergenic
11	671601	673200	1600	DEL	CA10	intron
11	1684401	1686000	1600	DEL	KIF2B;CA10	intergenic
11	1726801	1728400	1600	DEL	KIF2B;CA10	intergenic
11	2019601	2022400	2800	DEL	KIF2B;CA10	intergenic
11	2577201	2579600	2400	DEL	KIF2B;CA10	intergenic
11	2647201	2648800	1600	DUP	KIF2B;CA10	intergenic
11	5902001	5906000	4000	DEL	LOC101122120	intron
11	5933601	5938400	4800	DEL	LOC101122120	intron
11	7306801	7308400	1600	DUP	TRIM25;COIL	intergenic
11	9281201	9282800	1600	DEL	LOC105616287;PPM1E	intergenic
11	10013601	10016000	2400	DEL	LOC105611226	intron
11	15146401	15148000	1600	DEL	CCL1;TMEM132E	intergenic
11	16381201	16383200	2000	DUP	ASIC2	intron
11	16570801	16572400	1600	DEL	ASIC2	intron
11	18863201	18864800	1600	DEL	LOC101118202;LOC101102156	intergenic
11	18867201	18872400	5200	DEL	LOC101118202;LOC101102156	intergenic
11	20587201	20589200	2000	DUP	SSH2	intron
11	23728401	23732000	3600	DUP	LOC101120675;LOC101120421	intergenic
11	26876401	26878800	2400	DUP	SHBG;ATP1B2	intergenic
11	27906801	27908800	2000	DUP	PIK3R5	intron
11	29146801	29148400	1600	DEL	LOC101103408	intron
11	34921601	34927600	6000	DEL	KCNJ12;UTP18	intergenic
11	35902001	35905600	3600	DUP	TMEM92;COL1A1	intergenic
11	40056001	40057600	1600	DUP	WIPF2;CDC6	intergenic
11	40820001	40824000	4000	DUP	LOC101115138	intron
11	40826401	40828000	1600	DUP	LOC101115138	intron
11	40828801	40830400	1600	DUP	LOC101115138	intron
11	40907201	40916000	8800	DUP	LOC101115634;LOC101116068	intergenic
11	41370401	41372800	2400	DEL	HAP1	intron
11	43808001	43809600	1600	DEL	CCDC43;DBF4B	intergenic
11	47484001	47485600	1600	DUP	LOC101122803;GH	intergenic
11	47586801	47588400	1600	DUP	ICAM2	intron
11	47590801	47592400	1600	DUP	ICAM2	intron
11	47602801	47604400	1600	DUP	LOC101102254	intron
11	49643201	49644800	1600	DUP	LOC101106024;LOC101110855	intergenic
11	49645601	49647200	1600	DUP	LOC101106024;LOC101110855	intergenic
11	49648801	49650400	1600	DUP	LOC101110855	intron
11	49652001	49653600	1600	DUP	LOC101110855	intron
11	49657201	49660400	3200	DUP	LOC101110855	intron
11	55732801	55734800	2000	DUP	LOC101103909;LOC101103658	intergenic
11	55788801	55790800	2000	DUP	LOC101104414	intron
11	55802001	55803600	1600	DUP	LOC101104414;LOC101105174	intergenic
11	58036401	58038000	1600	DUP	LOC105606322;LOC105616446	intergenic
11	59912001	59913600	1600	DEL	LOC105610552;MAP2K6	intergenic
12	158801	160800	2000	DEL	PPFIA4	intron
12	4935201	4936800	1600	DUP	CFH	intron
12	4956801	4958400	1600	DUP	CFH	intron
12	4973601	4975200	1600	DUP	CFH	intron
12	4975601	4979200	3600	DUP	CFH	intron
12	4988401	4990000	1600	DUP	CFH	intron
12	5524401	5527200	2800	DUP	KCNT2	intron
12	5546801	5548400	1600	DUP	LOC101116246;KCNT2	intergenic
12	5548801	5551200	2400	DUP	LOC101116246;KCNT2	intergenic
12	5638401	5640400	2000	DEL	LOC106991476;LOC106990645	intergenic
12	5835601	5837200	1600	DUP	TRNAC-GCA;LOC101117007	intergenic
12	8202001	8203600	1600	DEL	TRNAK-UUU;TRNAC-GCA	intergenic
12	8766801	8768400	1600	DEL	TRNAK-UUU;TRNAC-GCA	intergenic
12	10542401	10544000	1600	DEL	LOC105611804	intron
12	11381201	11383600	2400	DUP	LOC105611808	intron
12	11865201	11868800	3600	DEL	LOC106990525;LOC105611808	intergenic
12	12356001	12357600	1600	DEL	LOC106990525;LOC105611808	intergenic
12	12496001	12497600	1600	DEL	LOC106990525;LOC105611808	intergenic
12	12570401	12572000	1600	DEL	LOC106990525;LOC105611808	intergenic
12	18324001	18326000	2000	DEL	ESRRG	intron
12	23820801	23822800	2000	DUP	TRNAT-UGU;DUSP10	intergenic
12	26142401	26149200	6800	DUP	DNAH14	intron
12	39092401	39094000	1600	DUP	TNFSF4;AADACL4	intergenic
12	45191201	45192800	1600	DUP	CHD5	intron
12	45523601	45527200	3600	DEL	TRNAS-GCU;NPHP4	intergenic
12	49259601	49261200	1600	DEL	FAM132A	intron
12	52217201	52218800	1600	DUP	LOC101111473;LOC105613543	intergenic
12	52230401	52232000	1600	DUP	LOC101111473;LOC105613543	intergenic
12	52481201	52483200	2000	DEL	LOC101113513;LOC101114039	intergenic
12	52538401	52540400	2000	DEL	LOC101114542;LOC101115051	intergenic
12	62678401	62680000	1600	DUP	ARPC5;NCF2	intergenic
12	75334801	75339200	4400	DUP	LOC105611348;ATP6V1G3	intergenic
12	75340001	75345200	5200	DUP	LOC105611348;ATP6V1G3	intergenic
12	75642801	75646800	4000	DEL	PTPRC	intron
12	76442401	76444400	2000	DUP	LOC105613171;NR5A2	intergenic
12	78128801	78130400	1600	DUP	LOC106991504;SYT2	intergenic
12	78130801	78132400	1600	DUP	LOC106991504;SYT2	intergenic
13	1160001	1163600	3600	DEL	PLCB1	intron
13	2169201	2171200	2000	DEL	PAK7	intron
13	2175201	2176800	1600	DUP	PAK7	intron
13	2706001	2707600	1600	DEL	ANKEF1;PAK7	intergenic
13	6127201	6129200	2000	DEL	SPTLC3	intron
13	7340801	7342800	2000	DUP	MACROD2	intron
13	9710801	9712400	1600	DEL	KIF16B	intron
13	16501201	16503200	2000	DUP	CCDC3;LOC101109728	intergenic
13	16518401	16520400	2000	DUP	CCDC3;LOC101109728	intergenic
13	28323201	28325200	2000	DEL	FAM107B;CDNF	intergenic
13	40223201	40225200	2000	DEL	PAX1;LOC105609021	intergenic
13	42053601	42055600	2000	DUP	FAM208B	intron
13	43897201	43898800	1600	DEL	LOC105611099;PITRM1	intergenic
13	45798001	45799600	1600	DUP	DIP2C	intron
13	46115601	46118400	2800	DEL	PRNP;ZMYND11	intergenic
13	46193201	46194800	1600	DUP	PRND;PRNT	intergenic
13	48741201	48743200	2000	DEL	LOC101117953;BMP2	intergenic
13	50487201	50489200	2000	DUP	RNF24	intron
13	53621601	53623600	2000	DUP	BHLHE23;YTHDF1	intergenic
13	54655201	54656800	1600	DEL	CDH4	intron
13	60836001	60837600	1600	DUP	TM9SF4	exon
13	61805201	61808000	2800	DUP	LOC105614410;LOC101114720	intergenic
13	62836401	62838000	1600	DUP	LOC105606907	intron
13	62838801	62840400	1600	DUP	LOC105606907	intron
13	62841601	62843200	1600	DUP	LOC105606907	intron
13	62843601	62850800	7200	DUP	LOC105606907	intron
13	62852001	62854400	2400	DUP	LOC105606907	intron
13	62857201	62859600	2400	DUP	LOC105606907	intron
13	62860401	62864000	3600	DUP	LOC105606907	intron
13	62868001	62869600	1600	DUP	LOC105606907;LOC101111988	intergenic
13	62918801	62920800	2000	DUP	LOC101111988	intron
13	62932801	62934800	2000	DUP	LOC101111988	intron
13	62938801	62940400	1600	DEL	LOC101111988	exon
13	63073601	63077600	4000	DUP	ASIP	intron
13	63111201	63112800	1600	DEL	ASIP	intron
13	63123201	63126000	2800	DEL	ASIP	intron
13	63128401	63130400	2000	DUP	ASIP;AHCY	intergenic
13	63154001	63156000	2000	DUP	AHCY	intron
13	63172801	63174800	2000	DUP	AHCY;ITCH	intergenic
13	63186801	63190000	3200	DEL	AHCY;ITCH	intergenic
13	63193201	63194800	1600	DEL	AHCY;ITCH	intergenic
13	63231201	63233600	2400	DEL	AHCY;ITCH	intergenic
13	63238801	63241600	2800	DUP	AHCY;ITCH	intergenic
13	63260401	63262400	2000	DEL	ITCH	intron
13	67218001	67220000	2000	DEL	FAM83D	intron
13	69134801	69136800	2000	DUP	TRNAW-CCA;TOP1	intergenic
13	73167201	73168800	1600	DEL	LOC105610219;LOC443097	intergenic
13	73383201	73385200	2000	DEL	TKDP5	intron
13	73436001	73448800	12800	DUP	TKDP1	intron
13	75205201	75207200	2000	DUP	EYA2	intron
13	75230401	75234000	3600	DUP	ZMYND8	intron
13	75239601	75246000	6400	DUP	ZMYND8	intron
13	77106801	77109200	2400	DUP	B4GALT5;PTGIS	intergenic
13	77122801	77124400	1600	DUP	B4GALT5;PTGIS	intergenic
14	7900401	7902400	2000	DEL	SDR42E1	intron
14	14618001	14621200	3200	DEL	MYLK3	intron
14	30111601	30113200	1600	DUP	CDH8;CDH11	intergenic
14	30399201	30401200	2000	DEL	CDH8;CDH11	intergenic
14	33117601	33119200	1600	DUP	LOC105616860;CDH5	intergenic
14	41978401	41980400	2000	DUP	TRNAG-CCC;ZNF507	intergenic
14	44356001	44358400	2400	DEL	LOC105616873;LOC105607568	intergenic
14	44360801	44362800	2000	DEL	LOC105616873;LOC105607568	intergenic
14	44597201	44600000	2800	DEL	LOC105607571;LOC105607569	intergenic
14	45976401	45978400	2000	DEL	ZNF382	intron
14	46507201	46509200	2000	DUP	LOC101103173	intron
14	48316001	48318800	2800	DUP	EID2;DYRK1B	intergenic
14	48319601	48321200	1600	DUP	EID2;DYRK1B	intergenic
14	48323201	48335600	12400	DUP	EID2;DYRK1B	intergenic
14	48336801	48338800	2000	DUP	EID2;DYRK1B	intergenic
14	48341601	48343600	2000	DUP	EID2;DYRK1B	intergenic
14	49358401	49360400	2000	DUP	LOC105614537;LOC101122718	intergenic
14	49363201	49364800	1600	DUP	LOC105614537;LOC101122718	intergenic
14	49370801	49373200	2400	DUP	LOC105614537;LOC101122718	intergenic
14	49376001	49378400	2400	DUP	LOC105614537;LOC101122718	intergenic
14	49388001	49389600	1600	DUP	-	-
14	49394401	49398400	4000	DUP	ERICH4;LOC101122718	intergenic
14	49401601	49403600	2000	DUP	ERICH4;LOC101122718	intergenic
14	49432001	49433600	1600	DUP	ERICH4;LOC105614373	intergenic
14	49448401	49450400	2000	DUP	LOC105614373	intron
14	49691601	49694400	2800	DUP	LOC105616889;LOC101122545	intergenic
14	49710401	49712000	1600	DUP	LOC105616889;LOC101122545	intergenic
14	49715201	49717200	2000	DUP	LOC105616889;LOC101122545	intergenic
14	49734001	49735600	1600	DUP	LOC105616889;LOC101122545	intergenic
14	50710001	50712000	2000	DUP	LOC101108413;LOC101108679	intergenic
14	50712801	50714800	2000	DUP	LOC101108413;LOC101108679	intergenic
14	53908001	53909600	1600	DUP	LOC106991572	exon
14	56888001	56890400	2400	DUP	LOC101105099;LOC101104852	intergenic
14	56893201	56895200	2000	DUP	LOC101105099;LOC101104852	intergenic
14	57177201	57178800	1600	DUP	LOC101107626	exon
14	57182401	57184000	1600	DUP	LOC101107626	intron
14	57193601	57195200	1600	DUP	LOC101107626;LOC101107891	intergenic
14	57196401	57199200	2800	DUP	LOC101107626;LOC101107891	intergenic
14	57202401	57204400	2000	DUP	LOC101107626;LOC101107891	intergenic
14	58130401	58132000	1600	DEL	LOC101111573;LOC101111827	intergenic
14	58132801	58162800	30000	DEL	LOC101111573;LOC101111827	intergenic
14	58284401	58287200	2800	DUP	LOC101113094;LOC101117868	intergenic
14	58291601	58294800	3200	DUP	LOC101113094;LOC101117868	intergenic
14	58300001	58302800	2800	DUP	LOC101117868	intron
14	58314001	58316800	2800	DUP	LOC101117868	intron
14	58318001	58319600	1600	DUP	LOC101117868	exon
14	58341601	58344400	2800	DUP	LOC101113357;LOC101113619	intergenic
14	58351601	58353200	1600	DUP	LOC101113619	intron
14	58360801	58362400	1600	DUP	LOC101113619	exon
14	58424401	58426000	1600	DUP	LOC101113879;LOC101114134	intergenic
14	58562801	58564400	1600	DEL	LOC101115398;LOC101115153	intergenic
14	58565201	58580800	15600	DEL	LOC101115398;LOC101115153	intergenic
14	58666401	58675600	9200	DUP	LOC101116169;LOC105601998	intergenic
14	58677601	58688400	10800	DUP	LOC105601998	intron
14	59581601	59584800	3200	DUP	LOC101123578	intron
14	59586001	59587600	1600	DUP	LOC101123578	exon
14	59661201	59666000	4800	DUP	LOC101123656	intron
14	59667601	59670400	2800	DUP	LOC101123656	intron
14	59671201	59676000	4800	DUP	LOC101123656	intron
14	59700401	59702000	1600	DEL	LOC105601888	intron
14	59725601	59728400	2800	DUP	LOC101102754	intron
14	59730801	59732800	2000	DUP	LOC101102754	intron
14	59733601	59735200	1600	DEL	LOC101102754;LOC101103007	intergenic
14	59756001	59758400	2400	DUP	LOC101103260	intron
14	59762801	59766000	3200	DUP	LOC101103260;LOC101103752	intergenic
14	59771601	59773200	1600	DUP	LOC101103260;LOC101103752	intergenic
14	59778001	59780000	2000	DUP	LOC101103752	intron
14	59783201	59896800	113600	DUP	LOC101104266;LOC105602005	intergenic
14	59984401	59986000	1600	DUP	LOC105601911;TTYH1	intergenic
14	60105201	60107600	2400	DUP	LOC100192427;LOC105602100	intergenic
14	60688401	60691200	2800	DUP	ZFP28	intron
14	61564401	61569600	5200	DEL	LOC101114805	exon
14	61639201	61640800	1600	DEL	LOC106991545;LOC101106962	intergenic
15	1758001	1759600	1600	DEL	GRIA4	intron
15	2605201	2608000	2800	DEL	LOC101117013;GRIA4	intergenic
15	2698401	2702000	3600	DEL	LOC101117013;GRIA4	intergenic
15	3023201	3025200	2000	DUP	LOC101117272;PDGFD	intergenic
15	6621601	6623600	2000	DEL	ANGPTL5;TRPC6	intergenic
15	12748001	12749600	1600	DUP	LOC101102333;LOC105602130	intergenic
15	13187201	13188800	1600	DEL	LOC101102333;LOC105602130	intergenic
15	15417201	15420000	2800	DEL	FUT4;PIWIL4	intergenic
15	15904801	15906400	1600	DEL	GUCY1A2	intron
15	18384801	18387600	2800	DEL	C15H11orf87;DDX10	intergenic
15	19169601	19171200	1600	DEL	C15H11orf87;ZC3H12C	intergenic
15	19835601	19837200	1600	DEL	LOC105602149;RDX	intergenic
15	24656401	24660000	3600	DEL	NXPE2;LOC106990350	intergenic
15	24662001	24664400	2400	DEL	NXPE2;LOC106990350	intergenic
15	26615601	26617600	2000	DUP	LOC105602190;LOC105602189	intergenic
15	26771201	26778400	7200	DUP	LOC105602190;LOC105602189	intergenic
15	26780801	26784400	3600	DUP	LOC105602190;LOC105602189	intergenic
15	29154801	29156800	2000	DUP	HINFP	intron
15	38703601	38705200	1600	DUP	PTH	intron
15	44102801	44106000	3200	DEL	LOC101109996;LOC101103264	intergenic
15	44431201	44432800	1600	DUP	OVCH2;LOC101106282	intergenic
15	45328401	45331200	2800	DUP	LOC101108077;LOC101108337	intergenic
15	45502801	45506000	3200	DUP	LOC101109119;LOC101109643	intergenic
15	45507601	45510000	2400	DUP	LOC101109119;LOC101109643	intergenic
15	45511201	45514400	3200	DUP	LOC101109119;LOC101109643	intergenic
15	45515601	45517200	1600	DUP	LOC101109119;LOC101109643	intergenic
15	45518001	45526000	8000	DUP	LOC101109119;LOC101109643	intergenic
15	45528001	45541200	13200	DUP	LOC101109119;LOC101109643	intergenic
15	45543201	45547600	4400	DUP	LOC101109119;LOC101109643	intergenic
15	45550001	45553200	3200	DUP	LOC101109119;LOC101109643	intergenic
15	45554801	45556800	2000	DUP	LOC101109119;LOC101109643	intergenic
15	45557201	45562800	5600	DUP	LOC101109119;LOC101109643	intergenic
15	45563601	45566400	2800	DUP	LOC101109119;LOC101109643	intergenic
15	45566801	45570000	3200	DUP	LOC101109119;LOC101109643	intergenic
15	45570401	45572400	2000	DUP	LOC101109119;LOC101109643	intergenic
15	45573601	45591600	18000	DUP	LOC101109119;LOC101109643	intergenic
15	45598001	45603200	5200	DUP	LOC101109119;LOC101109643	intergenic
15	45604401	45606000	1600	DUP	LOC101109119;LOC101109643	intergenic
15	45606401	45608000	1600	DUP	LOC101109119;LOC101109643	intergenic
15	45608401	45618000	9600	DUP	LOC101109119;LOC101109643	intergenic
15	45620801	45624800	4000	DUP	LOC101109119;LOC101109643	intergenic
15	45632401	45635600	3200	DUP	LOC101109119;LOC101109643	intergenic
15	45636801	45679200	42400	DUP	LOC101109643;MRPL17	intergenic
15	46460801	46462800	2000	DEL	LOC101115064;LOC101120948	intergenic
15	46541201	46543600	2400	DEL	LOC101121198;LOC101121451	intergenic
15	47155601	47158400	2800	DEL	LOC101121967;LOC101121708	intergenic
15	47359601	47361200	1600	DEL	LOC101104931;LOC101104424	intergenic
15	47416401	47429200	12800	DEL	LOC101102421;LOC101102671	intergenic
15	47434001	47439200	5200	DEL	LOC101102671;LOC101105185	intergenic
15	47440801	47450000	9200	DEL	LOC101105185;LOC101102928	intergenic
15	47464801	47467600	2800	DUP	LOC101105437;LOC101105945	intergenic
15	47482001	47483600	1600	DUP	LOC101105437;LOC101105945	intergenic
15	49105601	49110000	4400	DUP	LOC105614409;TRNAG-CCC	intergenic
15	49552401	49554800	2400	DUP	CHRNA10	intron
15	49555201	49558400	3200	DUP	CHRNA10	exon
15	54478801	54480400	1600	DEL	B3GNT6;ACER3	intergenic
15	69222001	69224400	2400	DEL	-	-
15	76513601	76515600	2000	DUP	LOC101102009	exon
15	76522401	76524400	2000	DUP	LOC101105526;LOC101106033	intergenic
15	76546001	76548400	2400	DEL	LOC101106283;LOC101106033	intergenic
15	76560401	76563600	3200	DEL	LOC101106283;LOC101106033	intergenic
15	76577601	76579200	1600	DUP	LOC101106283;LOC101106033	intergenic
15	76730401	76736400	6000	DEL	LOC101109120;LOC101109389	intergenic
15	76739201	76741600	2400	DEL	LOC101109120;LOC101109389	intergenic
15	77159201	77161200	2000	DUP	LOC106990733	intron
15	77259201	77261600	2400	DUP	LOC101117875	intron
15	77262401	77264400	2000	DUP	LOC101117875	intron
15	77704801	77711200	6400	DUP	LOC101119933	intron
15	77714401	77716400	2000	DUP	LOC101119933;LOC101105274	intergenic
15	79197201	79199600	2400	DEL	FAM111B;GLYATL2	intergenic
15	79259201	79261200	2000	DUP	FAM111B;DTX4	intergenic
15	79452401	79454400	2000	DUP	LOC101110445;LOC101111392	intergenic
15	80170801	80172400	1600	DUP	MS4A13	intron
16	1201	3600	2400	DUP	LOC106991653	intergenic
16	6801	11200	4400	DUP	LOC106991653	intron
16	13601	15200	1600	DUP	LOC106991653	exon
16	19601	21200	1600	DUP	LOC101103182;LOC105602432	intergenic
16	23601	25200	1600	DUP	LOC101103182;LOC105602432	intergenic
16	40001	43200	3200	DUP	LOC105602432	exon
16	47601	50000	2400	DUP	LOC105602432;LOC106991654	intergenic
16	50801	56000	5200	DUP	LOC105602432;LOC106991654	intergenic
16	59601	69200	9600	DUP	LOC105602432;LOC106991654	intergenic
16	72401	97200	24800	DUP	LOC105602665;LOC106991654	intergenic
16	2046801	2049200	2400	DUP	DOCK2	intron
16	3522801	3524800	2000	DUP	FGF18;FBXW11	intergenic
16	5169201	5171200	2000	DUP	BOD1;STC2	intergenic
16	17074801	17076800	2000	DEL	KIF2A	intron
16	21350801	21371200	20400	DEL	ACTBL2;PLK2	intergenic
16	29283201	29286000	2800	DEL	HCN1	intron
16	31589201	31593600	4400	DUP	LOC105602560;ZNF131	intergenic
16	31612401	31621200	8800	DUP	LOC105602560;ZNF131	intergenic
16	33120401	33122400	2000	DEL	PLCXD3	intron
16	33122801	33125200	2400	DEL	PLCXD3	intron
16	34615201	34619200	4000	DUP	LOC105602672;LOC105602568	intergenic
16	45139601	45141200	1600	DEL	LOC105602604;TRNAC-GCA	intergenic
16	45772801	45774400	1600	DUP	TRNAC-GCA;LOC101120952	intergenic
16	46300401	46302000	1600	DEL	TRNAC-GCA;LOC101120952	intergenic
16	46302001	46303600	1600	DEL	TRNAC-GCA;LOC101120952	intergenic
16	51691601	51695600	4000	DEL	CDH18;CDH12	intergenic
16	53998401	54000800	2400	DEL	TRNAS-GCU;LOC105602609	intergenic
16	57725201	57727600	2400	DEL	FBXL7;LOC105602617	intergenic
16	58746401	58748400	2000	DUP	LOC106991670;FAM105A	intergenic
16	64567201	64568800	1600	DEL	TRNAC-GCA;MTRR	intergenic
16	64583201	64585200	2000	DEL	TRNAC-GCA;MTRR	intergenic
16	64588001	64590000	2000	DEL	TRNAC-GCA;MTRR	intergenic
16	64602001	64604800	2800	DEL	TRNAC-GCA;MTRR	intergenic
16	65547201	65548800	1600	DUP	ADCY2	intron
16	66691201	66692800	1600	DEL	MED10;LOC105602644	intergenic
16	67261601	67263600	2000	DUP	LOC105602646;ICE1	intergenic
16	67370801	67372800	2000	DUP	LOC105602646;ICE1	intergenic
16	69796401	69798800	2400	DUP	LOC105602654;LOC105602652	intergenic
16	69800401	69802000	1600	DUP	LOC105602654;LOC105602652	intergenic
16	69802401	69811600	9200	DUP	LOC105602654;LOC105602652	intergenic
17	1219201	1221200	2000	DEL	CPE;TLL1	intergenic
17	1864401	1866400	2000	DEL	NPY2R;MAP9	intergenic
17	2167201	2170000	2800	DUP	NPY2R;RBM46	intergenic
17	2171201	2173600	2400	DUP	NPY2R;RBM46	intergenic
17	5088001	5090000	2000	DUP	FBXW7	intron
17	5896401	5899200	2800	DUP	GATB	intron
17	5901601	5903600	2000	DUP	GATB	intron
17	7793601	7795200	1600	DUP	LOC105602712;LOC105602713	intergenic
17	9569601	9571200	1600	DEL	NR3C2	intron
17	11332801	11334800	2000	DUP	TTC29	intron
17	13762801	13767200	4400	DUP	LOC105602739;FREM3	intergenic
17	13783601	13790000	6400	DUP	LOC105602739;FREM3	intergenic
17	14253601	14255600	2000	DUP	USP38;GAB1	intergenic
17	20545601	20547200	1600	DEL	TRNAW-CCA;PCDH18	intergenic
17	27372001	27374000	2000	DEL	TRNAS-GGA;LOC105602775	intergenic
17	33048801	33051200	2400	DEL	LOC105602798;ANKRD50	intergenic
17	35810801	35812800	2000	DUP	TRPC3;FSTL5	intergenic
17	37772801	37778400	5600	DEL	LOC101111319;FSTL5	intergenic
17	37786401	37788400	2000	DEL	LOC101111319;FSTL5	intergenic
17	38042401	38045600	3200	DEL	LOC101111319;FSTL5	intergenic
17	38396401	38398400	2000	DEL	LOC101111319;FSTL5	intergenic
17	40462001	40465200	3200	DEL	TMEM144	intron
17	54124801	54126800	2000	DUP	PPP1CC	intron
17	59524801	59526800	2000	DUP	TBX3;LOC105602894	intergenic
17	60996801	60998400	1600	DUP	SLC8B1;OAS2	intergenic
17	61953601	61955200	1600	DUP	ALDH2	intron
17	65721601	65723200	1600	DUP	SEZ6L	intron
17	70122401	70126000	3600	DUP	LOC106991686;LOC101117536	intergenic
17	70127201	70164800	37600	DUP	LOC101105442;LOC105601877	intergenic
17	70172801	70175600	2800	DUP	-	-
17	70196001	70202000	6000	DEL	LOC101106716;LOC101107996	intergenic
17	70202001	70205200	3200	DUP	LOC101106716;LOC101107996	intergenic
17	70204801	70210400	5600	DEL	LOC101106716;LOC101107996	intergenic
17	70210001	70212400	2400	DUP	LOC101106716;LOC101107996	intergenic
17	70216401	70222400	6000	DUP	LOC101107996;LOC101108519	intergenic
17	70248801	70250400	1600	DEL	-	-
17	70261601	70281600	20000	DUP	ZNF280B	intron
17	70283601	70301200	17600	DUP	-	-
17	70302001	70305200	3200	DUP	LOC101108258	intron
17	70563601	70565200	1600	DUP	LOC106991688	exon
18	74001	76400	2400	DUP	MKRN3	intergenic
18	1056401	1058800	2400	DEL	LOC101114216	intron
18	2395201	2397200	2000	DUP	TRNAE-UUC;GABRB3	intergenic
18	4809201	4811200	2000	DEL	LOC105603025;ALDH1A3	intergenic
18	6224801	6226400	1600	DUP	TRNASTOP-UCA;MEF2A	intergenic
18	7248401	7250800	2400	DEL	PGPEP1L	intron
18	8062801	8065600	2800	DEL	LOC105603041;LOC101112928	intergenic
18	13889601	13895600	6000	DEL	TRNAK-CUU;ST8SIA2	intergenic
18	16645201	16647600	2400	DEL	AGBL1	intron
18	18840001	18842400	2400	DUP	LOC101117021;LOC101123585	intergenic
18	18862401	18867200	4800	DEL	LOC101117021;LOC101123585	intergenic
18	18868401	18870400	2000	DEL	LOC101117021;LOC101123585	intergenic
18	18870801	18872400	1600	DEL	LOC101117021;LOC101123585	intergenic
18	18873201	18874800	1600	DEL	LOC101117021;LOC101123585	intergenic
18	18883601	18889200	5600	DEL	LOC101123585;LOC105603087	intergenic
18	18889601	18894400	4800	DEL	LOC101123585;LOC105603087	intergenic
18	18896001	18899200	3200	DEL	LOC101123585;LOC105603087	intergenic
18	18922001	18924800	2800	DEL	LOC101123585;LOC105603087	intergenic
18	18929201	18932000	2800	DUP	LOC105603087;LOC101118056	intergenic
18	18933601	18946000	12400	DUP	LOC105603087;LOC101118056	intergenic
18	20302401	20304000	1600	DUP	ANPEP	intron
18	28390001	28392400	2400	DEL	LOC106991735;CHRNA7	intergenic
18	32836001	32838000	2000	DEL	CYP1A1;EDC3	intergenic
18	36626801	36628800	2000	DUP	LOC105603166	intron
18	38218801	38220800	2000	DUP	LOC106991725	intron
18	42381601	42384000	2400	DEL	NPAS3	intron
18	42938401	42940400	2000	DUP	NPAS3	intron
18	48532801	48535200	2400	DEL	LOC101103187	exon
18	50928001	50929600	1600	DEL	LOC101104431;LRFN5	intergenic
18	50940001	50941600	1600	DEL	LOC101104431;LRFN5	intergenic
18	62602801	62605200	2400	DEL	TRNAS-GGA;BCL11B	intergenic
18	66356001	66358800	2800	DUP	LOC101104348	exon
18	66517601	66519600	2000	DEL	LOC106990142;EIF5	intergenic
18	68162401	68164000	1600	DUP	LOC105603285;BRF1	intergenic
19	24801	26400	1600	DUP	LOC105603319	intergenic
19	32001	44000	12000	DUP	LOC105603319	intergenic
19	1520801	1524000	3200	DUP	NEK10	intron
19	4296001	4299600	3600	DEL	RBMS3	intron
19	7348001	7349600	1600	DEL	GLB1	intron
19	8376001	8377600	1600	DUP	TRNAE-CUC;LOC105603358	intergenic
19	8950401	8956000	5600	DUP	LOC105603359;ARPP21	intergenic
19	16579601	16581600	2000	DUP	TATDN2	intron
19	19482001	19488000	6000	DEL	LOC105603423;GRM7	intergenic
19	19848001	19850000	2000	DEL	LOC105603423	intron
19	24355601	24358000	2400	DEL	LOC105603623;CNTN4	intergenic
19	24679601	24681200	1600	DUP	LOC105603623;CNTN4	intergenic
19	25893201	25898800	5600	DEL	CHL1;CNTN6	intergenic
19	26416001	26417600	1600	DUP	CHL1;CNTN3	intergenic
19	27639201	27642400	3200	DEL	LOC105603436;CNTN3	intergenic
19	28735201	28736800	1600	DUP	PPP4R2	intron
19	30137201	30138800	1600	DUP	FOXP1	intron
19	32047601	32050000	2400	DUP	MITF;FRMD4B	intergenic
19	33619601	33621200	1600	DEL	FAM19A1;LOC105603452	intergenic
19	34453201	34454800	1600	DUP	KBTBD8;SUCLG2	intergenic
19	36996401	36998400	2000	DEL	ADAMTS9;PRICKLE2	intergenic
19	47550801	47552400	1600	DUP	DCP1A;CACNA1D	intergenic
19	51330001	51331600	1600	DUP	SHISA5	intron
19	52695201	52696800	1600	DUP	LOC101102765	intron
19	53101601	53103200	1600	DUP	CCR3;LOC101103766	intergenic
19	53472401	53475200	2800	DUP	SLC6A20	intron
19	53766401	53768000	1600	DEL	LARS2	intron
19	58553601	58556000	2400	DEL	LOC105603597;NUP210	intergenic
19	59029201	59031200	2000	DUP	RAB7A;RPN1	intergenic
19	60410001	60411600	1600	DUP	CFAP100;KLF15	intergenic
20	4001	15200	11200	DUP	KHDRBS2	intergenic
20	770001	771600	1600	DEL	KHDRBS2	intron
20	909201	911600	2400	DEL	KHDRBS2	intron
20	913201	915200	2000	DEL	KHDRBS2	intron
20	917201	918800	1600	DEL	KHDRBS2	intron
20	991601	996800	5200	DEL	KHDRBS2	intron
20	1201201	1203600	2400	DEL	LOC105603922;KHDRBS2	intergenic
20	1204801	1212800	8000	DEL	LOC105603922;KHDRBS2	intergenic
20	1516401	1518400	2000	DEL	LOC105603922;KHDRBS2	intergenic
20	1756801	1758400	1600	DEL	LOC105603922;KHDRBS2	intergenic
20	1849201	1857200	8000	DEL	LOC105603922;PRIM2	intergenic
20	1858401	1860000	1600	DEL	LOC105603922;PRIM2	intergenic
20	1978801	1980400	1600	DEL	LOC105603922;PRIM2	intergenic
20	8897201	8899200	2000	DUP	UHRF1BP1	intron
20	16762401	16765600	3200	DUP	PTK7;SRF	intergenic
20	18320401	18322000	1600	DUP	SUPT3H	intron
20	20357201	20361200	4000	DEL	ADGRF1;TNFRSF21	intergenic
20	25296801	25300800	4000	DEL	LOC101108696;OVAR-DRB1	intergenic
20	25308001	25309600	1600	DEL	LOC101108696;OVAR-DRB1	intergenic
20	25313601	25316400	2800	DEL	LOC101108696;OVAR-DRB1	intergenic
20	25413201	25417200	4000	DEL	LOC101109220;LOC105603927	intergenic
20	25511601	25522800	11200	DEL	LOC101109492;OVAR-DRB3	intergenic
20	25524401	25528000	3600	DEL	OVAR-DRB3	intron
20	25552401	25558800	6400	DEL	OVAR-DRB3;DQA	intergenic
20	25560801	25585200	24400	DEL	OVAR-DRB3;DQA	intergenic
20	25634401	25636000	1600	DEL	DQA;LOC101120871	intergenic
20	25640801	25644000	3200	DEL	DQA;LOC101120871	intergenic
20	25644801	25652400	7600	DEL	DQA;LOC101120871	intergenic
20	25786001	25790400	4400	DEL	LOC105603751;LOC101110277	intergenic
20	25790801	25793600	2800	DEL	LOC105603751;LOC101110277	intergenic
20	25798001	25806400	8400	DEL	LOC105603751;LOC101110277	intergenic
20	25843201	25846400	3200	DUP	LOC101121635;LOC105603752	intergenic
20	26177201	26178800	1600	DUP	LOC101111058;LOC101122142	intergenic
20	26846401	26864800	18400	DUP	LOC106990117	intron
20	26878801	26888000	9200	DUP	LOC106990117	intron
20	26888801	26898400	9600	DUP	LOC106990117	intron
20	26902001	26966400	64400	DUP	LOC105603775;MICA	intergenic
20	27513201	27515200	2000	DUP	LOC101108432;LOC101110710	intergenic
20	27532801	27534400	1600	DEL	LOC101108432;LOC101110710	intergenic
20	27538001	27539600	1600	DEL	LOC101108432;LOC101110710	intergenic
20	27540801	27543600	2800	DEL	LOC101108432;LOC101110710	intergenic
20	27547201	27548800	1600	DEL	LOC101108432;LOC101110710	intergenic
20	27549601	27552800	3200	DEL	LOC101108432;LOC101110710	intergenic
20	27582401	27584400	2000	DEL	LOC101110710;LOC105603777	intergenic
20	27629601	27631600	2000	DUP	LOC101110710;LOC105603777	intergenic
20	27679601	27681200	1600	DUP	OLA-I;LOC101110973	intergenic
20	27965601	27967200	1600	DEL	LOC101113705;GABBR1	intergenic
20	27968401	27974800	6400	DEL	LOC101113705;GABBR1	intergenic
20	27976801	27982800	6000	DEL	LOC101113705;GABBR1	intergenic
20	27982801	27985200	2400	DEL	LOC101113705;GABBR1	intergenic
20	27985601	27990400	4800	DEL	LOC101113705;GABBR1	intergenic
20	28033201	28034800	1600	DUP	LOC101111325;LOC101113965	intergenic
20	28568001	28569600	1600	DEL	LOC101119515;LOC101116772	intergenic
20	29589201	29590800	1600	DEL	LOC105603936;LOC105603801	intergenic
20	31385601	31387200	1600	DUP	LOC101106806	intron
20	31931601	31933600	2000	DUP	ACOT13	intron
20	31943601	31945200	1600	DUP	TDP2;KIAA0319	intergenic
20	31946001	31948000	2000	DUP	TDP2;KIAA0319	intergenic
20	32903201	32905200	2000	DUP	TRNAC-GCA;LOC101119768	intergenic
20	34266001	34269600	3600	DUP	PRL;TRNAC-ACA	intergenic
20	49844801	49849200	4400	DUP	MYLK4;GMDS	intergenic
20	50294801	50296800	2000	DUP	TRNAS-GGA;FOXC1	intergenic
20	50298401	50300000	1600	DUP	TRNAS-GGA;FOXC1	intergenic
20	50350401	50352000	1600	DUP	TRNAS-GGA;LOC106990336	intergenic
20	50365201	50366800	1600	DUP	TRNAS-GGA;LOC106990336	intergenic
20	50400801	50403200	2400	DUP	TRNAS-GGA;LOC106990336	intergenic
20	50403201	50404800	1600	DUP	TRNAS-GGA;LOC106990336	intergenic
20	50431601	50433200	1600	DUP	LOC105603914;LOC105603915	intergenic
20	50444001	50445600	1600	DUP	LOC105603915	intron
20	50447601	50449600	2000	DUP	LOC105603915	intron
21	4906801	4910400	3600	DEL	LOC101109839;LOC101110373	intergenic
21	4911201	4918400	7200	DEL	LOC101109839;LOC101110373	intergenic
21	4918801	4923200	4400	DEL	LOC101110373	exon
21	6670401	6672000	1600	DUP	CTSC;GRM5	intergenic
21	7965601	7967200	1600	DEL	LOC105603971	intron
21	9064401	9066000	1600	DEL	CCDC83	intron
21	18976801	18978400	1600	DUP	LOC101117804;LUZP2	intergenic
21	21601601	21603600	2000	DEL	FANCF;SLC17A6	intergenic
21	26133201	26135200	2000	DUP	LOC101104356;LOC101104617	intergenic
21	26137601	26140000	2400	DEL	LOC101104356;LOC101104617	intergenic
21	26143601	26146400	2800	DEL	LOC101104617;LOC101104871	intergenic
21	26148401	26150400	2000	DEL	LOC101104617;LOC101104871	intergenic
21	26152001	26156000	4000	DEL	LOC101104871;LOC101101934	intergenic
21	26401601	26403200	1600	DEL	LOC101107914	intron
21	26760401	26762000	1600	DEL	LOC101104189;LOC101113113	intergenic
21	26764801	26766400	1600	DEL	LOC101113113	exon
21	26767601	26769600	2000	DUP	LOC101113113;LOC101113374	intergenic
21	26845201	26852400	7200	DEL	LOC101114148;LOC101114401	intergenic
21	28250801	28252400	1600	DEL	SOLD1;ACRV1	intergenic
21	31133201	31136400	3200	DUP	LOC105604057;ETS1	intergenic
21	37021201	37022800	1600	DUP	PAG11	intron
21	37538001	37541200	3200	DUP	LOC105604082	exon
21	37542001	37545600	3600	DUP	LOC105604082	exon
21	38499601	38501200	1600	DEL	LOC101104869;LOC105604093	intergenic
21	40978401	40980000	1600	DUP	LOC101119346	intron
21	46458001	46459600	1600	DUP	ANO1	intron
21	49010001	49012000	2000	DUP	IFITM10;KRTAP5.4	intergenic
21	49013601	49015200	1600	DUP	IFITM10;KRTAP5.4	intergenic
22	801	2400	1600	DUP	LOC101114149	intergenic
22	2801	7600	4800	DUP	LOC101114149	intergenic
22	1204001	1205600	1600	DEL	LOC105604204;ZWINT	intergenic
22	1206401	1208000	1600	DEL	LOC105604204;ZWINT	intergenic
22	1304801	1308800	4000	DEL	LOC105604204;ZWINT	intergenic
22	2414401	2418000	3600	DUP	LOC105604204;ZWINT	intergenic
22	2712001	2713600	1600	DUP	ZWINT;PCDH15	intergenic
22	3407601	3409600	2000	DEL	PCDH15	intron
22	3854801	3856800	2000	DUP	PCDH15	intron
22	9066801	9068400	1600	DUP	PAPSS2	intron
22	10062401	10064400	2000	DUP	LOC101122743;LOC101119862	intergenic
22	10065201	10072400	7200	DUP	LOC101122743;LOC101119862	intergenic
22	10996401	10998000	1600	DUP	PANK1	intron
22	11335201	11337200	2000	DEL	HTR7;KIF20B	intergenic
22	11394001	11395600	1600	DUP	HTR7;KIF20B	intergenic
22	13671201	13673600	2400	DUP	KIF11;IDE	intergenic
22	15766401	15768400	2000	DUP	LOC101107486;LOC101107056	intergenic
22	15886401	15888000	1600	DUP	LOC101106985;LOC101107486	intergenic
22	15890801	15892800	2000	DEL	LOC101106985;LOC101107486	intergenic
22	24125601	24127200	1600	DEL	CFAP58;SORCS3	intergenic
22	25763201	25765200	2000	DEL	SORCS3;SORCS1	intergenic
22	25768001	25770000	2000	DEL	SORCS3;SORCS1	intergenic
22	27226401	27228400	2000	DEL	LOC105604280;SORCS1	intergenic
22	28242801	28244400	1600	DUP	TRNAY-GUA;LOC105604280	intergenic
22	30412401	30415200	2800	DEL	SHOC2	intron
22	30860001	30861600	1600	DUP	ADRA2A;GPAM	intergenic
22	32810001	32812000	2000	DUP	HABP2;TCF7L2	intergenic
22	33910401	33912000	1600	DUP	ABLIM1	intron
22	34965601	34967600	2000	DEL	ATRNL1	intron
22	49270401	49272000	1600	DUP	TRNAG-UCC;TCERG1L	intergenic
22	50020801	50022800	2000	DUP	INPP5A	intron
23	77601	85200	7600	DUP	LOC101105794;LOC105613831	intergenic
23	183201	185600	2400	DEL	LOC105601878	intron
23	192401	196000	3600	DEL	LOC105601878	intron
23	2744001	2746000	2000	DUP	ZNF516;LOC105604384	intergenic
23	7805201	7806800	1600	DEL	DOK6	intron
23	7942401	7944400	2000	DUP	DOK6;CCDC102B	intergenic
23	12796801	12798800	2000	DUP	SYT4;PIK3C3	intergenic
23	16160001	16162000	2000	DEL	TRNAW-CCA;LOC101106129	intergenic
23	18649601	18651600	2000	DUP	LOC105604417;LOC106991868	intergenic
23	19384401	19386400	2000	DUP	LOC105604417;LOC106991868	intergenic
23	21858801	21860400	1600	DEL	INO80C	intron
23	23326801	23328800	2000	DUP	LOC105604430	intron
23	23330401	23332000	1600	DEL	NOL4	intron
23	27812801	27814400	1600	DEL	TRNAC-GCA;TRNAS-GGA	intergenic
23	31162401	31164000	1600	DEL	SS18;ZNF521	intergenic
23	35579601	35581600	2000	DUP	COLEC12	intron
23	38615201	38617200	2000	DEL	TRNAC-GCA;DLGAP1	intergenic
23	42396401	42398000	1600	DUP	APCDD1;VAPA	intergenic
23	46544001	46546000	2000	DEL	LOXHD1	intron
23	51061201	51063200	2000	DEL	LOC105604523;LOC105604525	intergenic
23	55781201	55782800	1600	DUP	TCF4;LOC105604541	intergenic
23	56673201	56676000	2800	DUP	LOC105604546;WDR7	intergenic
23	62086401	62092800	6400	DUP	LOC101104114;SERPINB11	intergenic
24	2484001	2485600	1600	DEL	LOC101120293;LOC105604623	intergenic
24	2490001	2493600	3600	DEL	LOC101120293;LOC105604623	intergenic
24	6140801	6142400	1600	DEL	RBFOX1	intron
24	9696001	9697600	1600	DUP	CLEC16A	intron
24	17845201	17847200	2000	DUP	GPR139;GP2	intergenic
24	20382801	20384400	1600	DUP	OTOA;HS3ST2	intergenic
24	20559201	20561200	2000	DUP	HS3ST2	intron
24	22534801	22536800	2000	DUP	SLC5A11	intron
24	23191201	23192800	1600	DUP	LOC101108538;HS3ST4	intergenic
24	35572401	35579200	6800	DEL	LOC105604785	exon
24	38366401	38378800	12400	DUP	LOC101107408	exon
25	2001	5200	3200	DUP	RHOU	intergenic
25	1606401	1609600	3200	DUP	GALNT2	intron
25	1678001	1679600	1600	DUP	PGBD5;GALNT2	intergenic
25	1680801	1683200	2400	DUP	PGBD5;GALNT2	intergenic
25	1698001	1699600	1600	DEL	PGBD5;GALNT2	intergenic
25	2192801	2200400	7600	DEL	LOC106991926;LOC101106652	intergenic
25	2842401	2844400	2000	DUP	LOC105613978;LOC105604893	intergenic
25	2845601	2847600	2000	DUP	LOC105613978;LOC105604893	intergenic
25	4610801	4612800	2000	DUP	DISC1	intron
25	4708801	4710400	1600	DEL	DISC1	intron
25	4712001	4714000	2000	DEL	DISC1	intron
25	4769601	4771600	2000	DUP	DISC1	intron
25	7876401	7878000	1600	DEL	TOMM20	intron
25	9698001	9700000	2000	DEL	LOC105604924;MTR	intergenic
25	11828401	11830000	1600	DEL	ZP4;CHRM3	intergenic
25	12790801	12792400	1600	DUP	LOC105604928;LOC105604933	intergenic
25	12801601	12806400	4800	DUP	LOC105604933;LOC105604932	intergenic
25	12808001	12809600	1600	DUP	LOC105604933;LOC105604932	intergenic
25	12927601	12929600	2000	DUP	LOC105604929;LOC101119014	intergenic
25	16604401	16607200	2800	DEL	LOC106991938;TMEM26	intergenic
25	26188801	26190800	2000	DEL	NPFFR1	intron
25	27019201	27020800	1600	DEL	PCBD1;UNC5B	intergenic
25	28829201	28831200	2000	DEL	PLA2G12B;P4HA1	intergenic
25	28833201	28836800	3600	DEL	PLA2G12B;P4HA1	intergenic
25	35036001	35037600	1600	DUP	PLAC9;SFTPD	intergenic
25	35058801	35061600	2800	DUP	PLAC9;SFTPD	intergenic
25	35132001	35134000	2000	DUP	SFTPD	intron
25	35135201	35137600	2400	DUP	SFTPD	intron
25	35301601	35303600	2000	DUP	DYDC2;FAM213A	intergenic
25	36282401	36284000	1600	DEL	SH2D4B;LOC106991931	intergenic
25	41522001	41523600	1600	DUP	LOC105605049	exon
25	43755201	43756800	1600	DEL	44263	intron
26	1601	4400	2800	DUP	ERICH1	intergenic
26	1415601	1417600	2000	DEL	MYOM2;LOC105605105	intergenic
26	4726001	4731200	5200	DUP	LOC105605296;LOC105605113	intergenic
26	5646801	5650400	3600	DUP	LOC105605298	intron
26	5964001	5969200	5200	DUP	SBD2	intron
26	13688001	13689600	1600	DUP	CASP3;IRF2	intergenic
26	20089601	20091200	1600	DEL	TUSC3	intron
26	21916401	21918400	2000	DUP	LOC106991950;LOC101122662	intergenic
26	25376801	25380000	3200	DEL	GTF2E2	intron
26	31688801	31691600	2800	DEL	PROSC;ADGRA2	intergenic
26	33808801	33810400	1600	DEL	C26H8orf4;ZMAT4	intergenic
26	37660801	37662400	1600	DUP	LRRC3B;LOC101120889	intergenic
26	40221201	40222800	1600	DEL	LOC106991956;THRB	intergenic
26	43527201	43529200	2000	DEL	LOC105605292	intergenic
26	43670801	43673600	2800	DEL	LOC105605292	intergenic
27	5201	6800	1600	DUP	LOC105605310	intergenic
27	6801	10000	3200	DUP	LOC105605310	intergenic
27	12001	13600	1600	DUP	LOC105605310	intergenic
27	14001	15600	1600	DUP	LOC105605310	intergenic
27	28401	30400	2000	DUP	LOC105605310	intergenic
27	34401	36800	2400	DUP	LOC105605310	intergenic
27	38001	40800	2800	DUP	LOC105605310	intergenic
27	42401	44400	2000	DUP	LOC105605310	intergenic
27	48001	50000	2000	DUP	LOC105605310	intergenic
27	56001	57600	1600	DUP	LOC105605310	intergenic
27	61201	62800	1600	DUP	LOC105605310	intergenic
27	76001	78400	2400	DUP	LOC105605310	intergenic
27	82001	83600	1600	DUP	LOC105605310	intergenic
27	86001	97200	11200	DUP	LOC105605310	intergenic
27	108001	109600	1600	DUP	LOC105605310	intergenic
27	123201	126000	2800	DUP	LOC105605310	intergenic
27	129201	131200	2000	DUP	LOC105605310	intergenic
27	140001	141600	1600	DUP	LOC105605310	intergenic
27	144801	148400	3600	DUP	LOC105605310	intergenic
27	153201	155200	2000	DUP	LOC105605310	intergenic
27	156401	158000	1600	DUP	LOC105605310	intergenic
27	159201	161600	2400	DUP	LOC105605310	intergenic
27	162401	164000	1600	DUP	LOC105605310	intergenic
27	166401	168800	2400	DUP	LOC105605310	intergenic
27	171201	172800	1600	DUP	LOC105605310	intergenic
27	176001	178400	2400	DUP	LOC105605310	intergenic
27	189601	191200	1600	DUP	LOC105605310	intergenic
27	197201	199200	2000	DUP	LOC105605310	intergenic
27	204001	206400	2400	DUP	LOC105605310	intergenic
27	208001	211200	3200	DUP	LOC105605310	intergenic
27	219601	221200	1600	DUP	LOC105605310	intergenic
27	228401	232000	3600	DUP	LOC105605310	intergenic
27	243201	244800	1600	DUP	LOC105605310	intergenic
27	252401	254800	2400	DUP	LOC105605310	intergenic
27	258401	260000	1600	DUP	LOC105605310	intergenic
27	263601	265200	1600	DUP	LOC105605310	intergenic
27	267601	273600	6000	DUP	LOC105605310	intergenic
27	275601	277600	2000	DUP	LOC105605310	intergenic
27	280401	282400	2000	DUP	LOC105605310	intergenic
27	285601	287200	1600	DUP	LOC105605310	intergenic
27	291601	294400	2800	DUP	LOC105605310	intergenic
27	301601	304000	2400	DUP	LOC105605310	intergenic
27	307201	308800	1600	DUP	LOC105605310	intergenic
27	311201	312800	1600	DUP	LOC105605310	intergenic
27	317201	318800	1600	DUP	LOC105605310	intergenic
27	322401	324800	2400	DUP	LOC105605310	intergenic
27	327201	329200	2000	DUP	LOC105605310	intergenic
27	349601	351600	2000	DUP	LOC105605310	intergenic
27	356801	359200	2400	DUP	LOC105605310	intergenic
27	373601	375600	2000	DUP	LOC105605310	intergenic
27	376001	379600	3600	DUP	LOC105605310	intergenic
27	385601	387200	1600	DUP	LOC105605310	intergenic
27	398401	403600	5200	DUP	LOC105605310	intergenic
27	410801	412800	2000	DUP	LOC105605310	intergenic
27	422001	424400	2400	DUP	LOC105605310	intergenic
27	424801	426800	2000	DUP	LOC105605310	intergenic
27	430801	432400	1600	DUP	LOC105605310	intron
27	442001	443600	1600	DUP	LOC105605310;CRLF2	intergenic
27	448801	450400	1600	DUP	LOC105605310;CRLF2	intergenic
27	453601	456800	3200	DUP	LOC105605310;CRLF2	intergenic
27	460001	464800	4800	DUP	LOC105605310;CRLF2	intergenic
27	466801	469200	2400	DUP	LOC105605310;CRLF2	intergenic
27	470001	472000	2000	DUP	LOC105605310;CRLF2	intergenic
27	476001	477600	1600	DUP	LOC105605310;CRLF2	intergenic
27	486801	489200	2400	DUP	CRLF2	intron
27	494001	496400	2400	DUP	CRLF2	intron
27	508001	509600	1600	DUP	CRLF2;LOC101115509	intergenic
27	517601	520800	3200	DUP	CRLF2;LOC101115509	intergenic
27	524401	526400	2000	DUP	LOC101115509	intron
27	527601	530000	2400	DUP	LOC101115509	intron
27	550001	551600	1600	DUP	LOC105605313;LOC101115509	intergenic
27	555601	563600	8000	DUP	LOC105605313	intron
27	566801	568400	1600	DUP	LOC105605313	intron
27	571601	573600	2000	DUP	LOC105605313	intron
27	582401	584800	2400	DUP	IL3RA;LOC105605313	intergenic
27	584801	586400	1600	DUP	IL3RA;LOC105605313	intergenic
27	590801	592800	2000	DUP	IL3RA;LOC105605313	intergenic
27	595201	597600	2400	DUP	IL3RA	exon
27	600801	602800	2000	DUP	IL3RA	intron
27	619201	621600	2400	DUP	SLC25A6	intron
27	644001	647200	3200	DUP	P2RY8	exon
27	647601	649200	1600	DUP	P2RY8	intron
27	650801	652400	1600	DUP	P2RY8	intron
27	659201	660800	1600	DUP	P2RY8;AKAP17A	intergenic
27	672001	673600	1600	DUP	P2RY8;AKAP17A	intergenic
27	675201	677200	2000	DUP	P2RY8;AKAP17A	intergenic
27	680401	686000	5600	DUP	P2RY8;AKAP17A	intergenic
27	692801	696400	3600	DUP	P2RY8;AKAP17A	intergenic
27	698801	700400	1600	DUP	P2RY8;AKAP17A	intergenic
27	706401	708000	1600	DUP	P2RY8;AKAP17A	intergenic
27	709201	711600	2400	DUP	P2RY8;AKAP17A	intergenic
27	712801	715600	2800	DUP	P2RY8;AKAP17A	intergenic
27	720401	723200	2800	DUP	P2RY8;AKAP17A	intergenic
27	726001	727600	1600	DUP	AKAP17A	exon
27	730401	732400	2000	DUP	AKAP17A	intron
27	737601	739200	1600	DUP	AKAP17A;ASMT	intergenic
27	742001	746800	4800	DUP	AKAP17A;ASMT	intergenic
27	747601	750800	3200	DUP	ASMT	intron
27	753601	756000	2400	DUP	ASMT	intron
27	768801	770800	2000	DUP	ASMT	intron
27	773201	775200	2000	DUP	ASMT	intron
27	776001	778800	2800	DUP	ASMT	intron
27	780001	782000	2000	DUP	ASMT	intron
27	784001	785600	1600	DUP	ASMT;LOC106990378	intergenic
27	788401	792800	4400	DUP	ASMT;LOC106990378	intergenic
27	800001	802800	2800	DUP	ASMT;LOC106990378	intergenic
27	809201	810800	1600	DUP	ASMT;LOC106990378	intergenic
27	818401	820000	1600	DUP	ASMT;LOC106990378	intergenic
27	829601	834400	4800	DUP	ASMT;LOC106990378	intergenic
27	842401	844000	1600	DUP	ASMT;LOC106990378	intergenic
27	846001	852000	6000	DUP	ASMT;LOC106990378	intergenic
27	853201	854800	1600	DUP	ASMT;LOC106990378	intergenic
27	857601	861600	4000	DUP	ASMT;LOC106990378	intergenic
27	864001	866400	2400	DUP	ASMT;LOC106990378	intergenic
27	876001	879200	3200	DUP	ASMT;LOC106990378	intergenic
27	898801	900800	2000	DUP	ASMT;LOC106990378	intergenic
27	905201	907600	2400	DUP	LOC106990378	intron
27	912801	914400	1600	DUP	LOC106990378	intron
27	920401	922400	2000	DEL	LOC106990378	intron
27	923201	925600	2400	DUP	LOC106990378	intron
27	938001	941200	3200	DUP	LOC106990378	intron
27	945601	951600	6000	DUP	LOC106990378	intron
27	961201	963600	2400	DUP	LOC106990378;DHRSX	intergenic
27	973601	975200	1600	DUP	LOC106990378;DHRSX	intergenic
27	981201	982800	1600	DUP	LOC106990378;DHRSX	intergenic
27	992401	997600	5200	DUP	DHRSX	intron
27	998401	1000400	2000	DUP	DHRSX	intron
27	1012001	1013600	1600	DUP	DHRSX	exon
27	1022801	1024800	2000	DUP	DHRSX	intron
27	1031201	1032800	1600	DUP	DHRSX	intron
27	1033201	1035600	2400	DUP	DHRSX	intron
27	1041201	1042800	1600	DUP	DHRSX	intron
27	1056001	1058400	2400	DUP	DHRSX	intron
27	1064801	1066400	1600	DUP	DHRSX	intron
27	1070001	1072000	2000	DUP	DHRSX	intron
27	1072801	1074800	2000	DUP	DHRSX	intron
27	1080801	1082800	2000	DUP	DHRSX	intron
27	1084001	1085600	1600	DUP	DHRSX	intron
27	1088001	1090400	2400	DUP	ZBED1;DHRSX	intergenic
27	1093201	1095600	2400	DUP	ZBED1;DHRSX	intergenic
27	1097201	1099600	2400	DUP	ZBED1;DHRSX	intergenic
27	1101601	1103600	2000	DUP	ZBED1;DHRSX	intergenic
27	1114401	1116000	1600	DUP	ZBED1;CD99	intergenic
27	1118401	1122400	4000	DUP	ZBED1;CD99	intergenic
27	1133201	1134800	1600	DUP	ZBED1;CD99	intergenic
27	1135201	1136800	1600	DUP	ZBED1;CD99	intergenic
27	1137201	1138800	1600	DUP	ZBED1;CD99	intergenic
27	1145201	1149600	4400	DUP	ZBED1;CD99	intergenic
27	1157601	1160400	2800	DUP	ZBED1;CD99	intergenic
27	1174801	1176800	2000	DUP	CD99	intron
27	1179201	1180800	1600	DUP	CD99	intron
27	1182801	1185200	2400	DUP	CD99	intron
27	1188001	1190400	2400	DUP	CD99	intron
27	1192001	1193600	1600	DUP	CD99	intron
27	1200001	1201600	1600	DUP	CD99	intron
27	1207601	1209200	1600	DUP	CD99	intron
27	1221201	1222800	1600	DUP	CD99	intron
27	1223201	1225600	2400	DUP	CD99	exon
27	1228001	1229600	1600	DUP	XG;CD99	intergenic
27	1237601	1239600	2000	DUP	XG	intron
27	1240801	1242800	2000	DUP	XG	intron
27	1244801	1247200	2400	DUP	XG	intron
27	1258401	1260400	2000	DUP	XG;GYG2	intergenic
27	1264801	1269200	4400	DUP	GYG2	intron
27	1273601	1275600	2000	DUP	GYG2	intron
27	1278001	1283600	5600	DUP	GYG2	intron
27	1288401	1290000	1600	DUP	LOC101116024	intron
27	1292401	1301200	8800	DUP	LOC101116024	intron
27	1305201	1308800	3600	DUP	LOC101116024	intron
27	1310401	1312000	1600	DUP	LOC101116024	intron
27	1320401	1322000	1600	DUP	ARSE	intron
27	1333201	1337200	4000	DUP	ARSE;LOC101116287	intergenic
27	1352401	1354000	1600	DUP	LOC101116287	intron
27	1355201	1357200	2000	DUP	LOC101116287	intron
27	1368801	1370800	2000	DUP	LOC101116287;LOC105605318	intergenic
27	1372001	1376800	4800	DUP	LOC101116287;LOC105605318	intergenic
27	1381201	1384000	2800	DUP	LOC101116287;LOC105605318	intergenic
27	1394001	1395600	1600	DUP	LOC105605318	exon
27	1402001	1405600	3600	DUP	LOC105605318;MXRA5	intergenic
27	1407601	1410400	2800	DUP	LOC105605318;MXRA5	intergenic
27	1426801	1429200	2400	DUP	LOC105605318;MXRA5	intergenic
27	1431601	1435600	4000	DUP	LOC105605318;MXRA5	intergenic
27	1439601	1444000	4400	DUP	LOC105605318;MXRA5	intergenic
27	1454001	1455600	1600	DUP	MXRA5	intron
27	1474401	1476800	2400	DUP	MXRA5;LOC105605319	intergenic
27	1479601	1483600	4000	DUP	MXRA5;LOC105605319	intergenic
27	1509201	1510800	1600	DUP	LOC105605319	intron
27	1512401	1514000	1600	DUP	LOC105605319	exon
27	1526401	1528400	2000	DEL	LOC105605319;LOC105605321	intergenic
27	1530801	1532400	1600	DUP	LOC105605321	exon
27	1533601	1536000	2400	DUP	LOC105605321	exon
27	1536001	1538000	2000	DUP	LOC105605321	intron
27	1542801	1546800	4000	DUP	LOC105605321	intron
27	1547201	1549600	2400	DUP	LOC105605321	intron
27	1553201	1554800	1600	DUP	LOC105605321	intron
27	1561601	1563200	1600	DEL	LOC105605320;PRKX	intergenic
27	1563201	1565200	2000	DUP	LOC105605320;PRKX	intergenic
27	1566001	1567600	1600	DUP	LOC105605320;PRKX	intergenic
27	1570001	1574000	4000	DUP	LOC105605320;PRKX	intergenic
27	1583201	1584800	1600	DUP	LOC105605320;PRKX	intergenic
27	1585601	1589600	4000	DUP	LOC105605320;PRKX	intergenic
27	1592401	1594000	1600	DUP	LOC105605320;PRKX	intergenic
27	1604801	1607200	2400	DUP	PRKX	intron
27	1617201	1620400	3200	DUP	PRKX	intron
27	1636001	1638400	2400	DUP	LOC105605323;PRKX	intergenic
27	1639601	1641200	1600	DUP	LOC105605323;PRKX	intergenic
27	1642001	1646000	4000	DUP	LOC105605323;PRKX	intergenic
27	1657201	1658800	1600	DUP	LOC105605323;PRKX	intergenic
27	1662001	1663600	1600	DUP	LOC105605323;PRKX	intergenic
27	1669601	1672800	3200	DUP	LOC105605323;PRKX	intergenic
27	1688001	1690400	2400	DUP	LOC105605323;PRKX	intergenic
27	1695201	1696800	1600	DUP	LOC105605323;PRKX	intergenic
27	1722801	1724400	1600	DUP	LOC105605323;PRKX	intergenic
27	1738001	1740800	2800	DUP	LOC105605323;PRKX	intergenic
27	1756401	1758000	1600	DUP	LOC105605323;PRKX	intergenic
27	1763201	1764800	1600	DUP	LOC105605323;PRKX	intergenic
27	1771201	1772800	1600	DUP	LOC105605323;PRKX	intergenic
27	1775601	1777600	2000	DUP	LOC105605323;PRKX	intergenic
27	1780801	1784800	4000	DUP	LOC105605323;PRKX	intergenic
27	1786401	1788000	1600	DUP	LOC105605323;PRKX	intergenic
27	1790801	1792400	1600	DUP	LOC105605323;PRKX	intergenic
27	1813201	1816800	3600	DUP	LOC105605323;PRKX	intergenic
27	1818001	1819600	1600	DUP	LOC105605323;PRKX	intergenic
27	1827201	1829200	2000	DUP	LOC105605323;PRKX	intergenic
27	1840001	1841600	1600	DUP	LOC105605323;PRKX	intergenic
27	1843601	1845200	1600	DUP	LOC105605323;PRKX	intergenic
27	1845201	1854800	9600	DUP	LOC105605323;PRKX	intergenic
27	1858001	1860400	2400	DUP	LOC105605323;PRKX	intergenic
27	1863601	1866000	2400	DUP	LOC105605323;PRKX	intergenic
27	1878801	1880800	2000	DUP	LOC105605323;PRKX	intergenic
27	1890401	1892400	2000	DUP	LOC105605323;PRKX	intergenic
27	1892801	1894400	1600	DUP	LOC105605323;PRKX	intergenic
27	1895601	1899200	3600	DUP	LOC105605323;PRKX	intergenic
27	1902401	1904000	1600	DUP	LOC105605323;PRKX	intergenic
27	1914801	1916400	1600	DUP	LOC105605323;PRKX	intergenic
27	1926001	1928000	2000	DUP	LOC105605323;LOC105605322	intergenic
27	1930401	1932400	2000	DUP	LOC105605323;LOC105605322	intergenic
27	1938001	1940000	2000	DUP	LOC105605323;LOC105605322	intergenic
27	1948401	1950000	1600	DUP	LOC105605323;LOC105605322	intergenic
27	1961201	1963200	2000	DUP	LOC105605322	intron
27	1968801	1972800	4000	DUP	LOC105605322	intron
27	1976401	1978000	1600	DUP	LOC105605322	intron
27	1986001	1988000	2000	DUP	LOC105605322	intron
27	1988801	1991200	2400	DUP	LOC105605322	intron
27	1993601	1996400	2800	DUP	LOC105605322	intron
27	2008401	2013600	5200	DUP	LOC101117055;LOC105605322	intergenic
27	2020801	2022400	1600	DUP	LOC101117055;LOC105605322	intergenic
27	2026801	2028400	1600	DUP	LOC101117055;LOC105605322	intergenic
27	2031201	2032800	1600	DUP	LOC101117055;LOC105605322	intergenic
27	2033601	2035600	2000	DUP	LOC101117055;LOC105605322	intergenic
27	2051201	2053200	2000	DUP	LOC101117055;LOC105605322	intergenic
27	2064001	2065600	1600	DUP	LOC101117055;LOC105605322	intergenic
27	2072801	2076800	4000	DUP	LOC101117055	intron
27	2077601	2082400	4800	DUP	LOC101117055	intron
27	2087601	2090800	3200	DUP	LOC101117055	intron
27	2095601	2098000	2400	DUP	LOC101117055;LOC101116018	intergenic
27	2098401	2101200	2800	DUP	LOC101117055;LOC101116018	intergenic
27	2101601	2104000	2400	DUP	LOC101117055;LOC101116018	intergenic
27	2105601	2107200	1600	DUP	LOC101117055;LOC101116018	intergenic
27	2127601	2129200	1600	DUP	LOC101117055;LOC101116018	intergenic
27	2131601	2133600	2000	DUP	LOC101117055;LOC101116018	intergenic
27	2136401	2140000	3600	DUP	LOC101117055;LOC101116018	intergenic
27	2147201	2151200	4000	DUP	LOC101117055;LOC101116018	intergenic
27	2153201	2155600	2400	DUP	LOC101117055;LOC101116018	intergenic
27	2157601	2160000	2400	DUP	LOC101117055;LOC101116018	intergenic
27	2168001	2170400	2400	DUP	LOC101117055;LOC101116018	intergenic
27	2172001	2174000	2000	DUP	LOC101117055;LOC101116018	intergenic
27	2174401	2177200	2800	DUP	LOC101117055;LOC101116018	intergenic
27	2178801	2181200	2400	DUP	LOC101117055;LOC101116018	intergenic
27	2184001	2186000	2000	DUP	LOC101117055;LOC101116018	intergenic
27	2188801	2190400	1600	DUP	LOC101117055;LOC101116018	intergenic
27	2193601	2196400	2800	DUP	LOC101117055;LOC101116018	intergenic
27	2205601	2207200	1600	DUP	LOC101117055;LOC101116018	intergenic
27	2214801	2216400	1600	DUP	LOC101117055;LOC101116018	intergenic
27	2220401	2222000	1600	DUP	LOC101117055;LOC101116018	intergenic
27	2227201	2228800	1600	DUP	LOC101117055;LOC101116018	intergenic
27	2229601	2232000	2400	DUP	LOC101117055;LOC101116018	intergenic
27	2254801	2258000	3200	DUP	LOC101117055;LOC101116018	intergenic
27	2261601	2266400	4800	DUP	LOC101117055;LOC101116018	intergenic
27	2267201	2268800	1600	DUP	LOC101117055;LOC101116018	intergenic
27	2284401	2286000	1600	DUP	LOC101117055;LOC101116018	intergenic
27	2286801	2288400	1600	DUP	LOC101117055;LOC101116018	intergenic
27	2295601	2297200	1600	DUP	LOC101117055;LOC101116018	intergenic
27	2323601	2327200	3600	DUP	LOC101117055;LOC101116018	intergenic
27	2333201	2336000	2800	DUP	LOC101117055;LOC101116018	intergenic
27	2337601	2339200	1600	DUP	LOC101117055;LOC101116018	intergenic
27	2344001	2346400	2400	DUP	LOC101117055;LOC101116018	intergenic
27	2349201	2350800	1600	DUP	LOC101117055;LOC101116018	intergenic
27	2351201	2355200	4000	DUP	LOC101117055;LOC101116018	intergenic
27	2368801	2370400	1600	DUP	LOC101117055;LOC101116018	intergenic
27	2380401	2384400	4000	DUP	LOC101117055;LOC101116018	intergenic
27	2385201	2388400	3200	DUP	LOC101117055;LOC101116018	intergenic
27	2391201	2393200	2000	DUP	LOC101117055;LOC101116018	intergenic
27	2395201	2398000	2800	DUP	LOC101117055;LOC101116018	intergenic
27	2406001	2407600	1600	DUP	LOC101117055;LOC101116018	intergenic
27	2410001	2412400	2400	DUP	LOC101117055;LOC101116018	intergenic
27	2413601	2415600	2000	DUP	LOC101117055;LOC101116018	intergenic
27	2428801	2430800	2000	DUP	LOC101117055;LOC101116018	intergenic
27	2439601	2441200	1600	DUP	LOC101117055;LOC101116018	intergenic
27	2447201	2449200	2000	DUP	LOC101117055;LOC101116018	intergenic
27	2456001	2459600	3600	DUP	LOC101117055;LOC101116018	intergenic
27	2460801	2462800	2000	DUP	LOC101117055;LOC101116018	intergenic
27	2464401	2466000	1600	DUP	LOC101117055;LOC101116018	intergenic
27	2469201	2471600	2400	DUP	LOC101117055;LOC101116018	intergenic
27	2480801	2482800	2000	DEL	LOC101117055;LOC101116018	intergenic
27	2504001	2506400	2400	DUP	LOC101116018	intron
27	2508001	2509600	1600	DUP	LOC101116018	intron
27	2511201	2512800	1600	DUP	LOC101116018	intron
27	2526001	2528800	2800	DUP	LOC105605670;LOC101116018	intergenic
27	2529601	2531600	2000	DUP	LOC105605670;LOC101116018	intergenic
27	2532401	2534400	2000	DUP	LOC105605670;LOC101116018	intergenic
27	2541601	2543600	2000	DUP	LOC105605670;LOC101116018	intergenic
27	2551601	2556000	4400	DUP	LOC105605670;LOC101116018	intergenic
27	2565601	2567200	1600	DUP	LOC105605670;LOC101116018	intergenic
27	2574001	2576000	2000	DUP	LOC105605670;LOC101116018	intergenic
27	2576001	2577600	1600	DUP	LOC105605670;LOC101116018	intergenic
27	2578401	2580400	2000	DUP	LOC105605670;LOC101116018	intergenic
27	2588001	2590000	2000	DUP	LOC105605670	intron
27	2592801	2595200	2400	DUP	LOC105605670	intron
27	2597601	2599600	2000	DUP	LOC105605670	intron
27	2605201	2608400	3200	DUP	LOC101116281;LOC105605670	intergenic
27	2621601	2630800	9200	DUP	LOC101116281;LOC105605670	intergenic
27	2632401	2634400	2000	DUP	LOC101116281;LOC105605670	intergenic
27	2635601	2639600	4000	DUP	LOC101116281;LOC105605670	intergenic
27	2648401	2650400	2000	DUP	LOC101116281;LOC105605670	intergenic
27	2658401	2660400	2000	DUP	LOC101116281;LOC105605670	intergenic
27	2663601	2665600	2000	DUP	LOC101116281;LOC105605670	intergenic
27	2670001	2673600	3600	DUP	LOC101116281;LOC105605670	intergenic
27	2675201	2678400	3200	DUP	LOC101116281;LOC105605670	intergenic
27	2683601	2685200	1600	DUP	LOC101116281;LOC105605670	intergenic
27	2690001	2692800	2800	DUP	LOC101116281;LOC105605670	intergenic
27	2720801	2722400	1600	DUP	LOC101116281;LOC105605670	intergenic
27	2741201	2742800	1600	DUP	LOC101116281;LOC105605670	intergenic
27	2744401	2746000	1600	DUP	LOC101116281;LOC105605670	intergenic
27	2762001	2765200	3200	DUP	LOC101116281;LOC105605670	intergenic
27	2769601	2772800	3200	DUP	LOC101116281;LOC105605670	intergenic
27	2778801	2780400	1600	DUP	LOC101116281;LOC105605670	intergenic
27	2788401	2790400	2000	DUP	LOC101116281;LOC105605670	intergenic
27	2813601	2816000	2400	DUP	LOC101116281;LOC105605670	intergenic
27	2818401	2820000	1600	DUP	LOC101116281;LOC105605670	intergenic
27	2820001	2822400	2400	DUP	LOC101116281;LOC105605670	intergenic
27	2827601	2829200	1600	DUP	LOC101116281	intron
27	2836401	2838000	1600	DUP	LOC101116281;LOC101116537	intergenic
27	2840801	2842400	1600	DUP	LOC101116281;LOC101116537	intergenic
27	2843601	2847200	3600	DUP	LOC101116281;LOC101116537	intergenic
27	2849601	2851200	1600	DUP	LOC101116281;LOC101116537	intergenic
27	2855201	2865200	10000	DUP	LOC101116537;LOC101116799	intergenic
27	2878401	2880000	1600	DUP	LOC101116537;LOC101116799	intergenic
27	2880801	2882400	1600	DUP	LOC101116537;LOC101116799	intergenic
27	2883201	2884800	1600	DUP	LOC101116537;LOC101116799	intergenic
27	2885601	2887200	1600	DUP	LOC101116537;LOC101116799	intergenic
27	2888001	2890400	2400	DUP	LOC101116537;LOC101116799	intergenic
27	2894001	2896000	2000	DUP	LOC101116537;LOC101116799	intergenic
27	2897601	2899200	1600	DUP	LOC101116537;LOC101116799	intergenic
27	2902001	2904800	2800	DUP	LOC101116537;LOC101116799	intergenic
27	2907601	2909200	1600	DUP	LOC101116537;LOC101116799	intergenic
27	2928401	2931200	2800	DUP	LOC101116537;LOC101116799	intergenic
27	2933201	2935200	2000	DUP	LOC101116537;LOC101116799	intergenic
27	2938001	2939600	1600	DUP	LOC101116537;LOC101116799	intergenic
27	2940401	2942800	2400	DUP	LOC101116537;LOC101116799	intergenic
27	2958401	2960800	2400	DUP	LOC101116799;LOC106991978	intergenic
27	2965201	2968400	3200	DUP	LOC101116799;LOC106991978	intergenic
27	2969601	2971600	2000	DUP	LOC101116799;LOC106991978	intergenic
27	2973601	2975600	2000	DUP	LOC101116799;LOC106991978	intergenic
27	2976801	2978800	2000	DUP	LOC101116799;LOC106991978	intergenic
27	2985601	2987600	2000	DUP	LOC101116799;LOC106991978	intergenic
27	2989201	2991600	2400	DUP	LOC101116799;LOC106991978	intergenic
27	3002401	3004000	1600	DUP	LOC101116799;LOC106991978	intergenic
27	3008401	3010000	1600	DUP	LOC101116799;LOC106991978	intergenic
27	3016801	3018400	1600	DUP	LOC101116799;LOC106991978	intergenic
27	3034401	3036000	1600	DUP	LOC101116799;LOC106991978	intergenic
27	3036401	3038400	2000	DUP	LOC101116799;LOC106991978	intergenic
27	3041601	3048400	6800	DUP	LOC101116799;LOC106991978	intergenic
27	3067601	3070800	3200	DUP	LOC101116799;LOC106991978	intergenic
27	3090401	3092400	2000	DUP	LOC101116799;LOC106991978	intergenic
27	3098001	3099600	1600	DUP	LOC101116799;LOC106991978	intergenic
27	3102401	3104000	1600	DUP	LOC101116799;LOC106991978	intergenic
27	3105601	3108400	2800	DUP	LOC101116799;LOC106991978	intergenic
27	3122001	3124400	2400	DUP	LOC101116799;LOC106991978	intergenic
27	3130001	3131600	1600	DUP	LOC101116799;LOC106991978	intergenic
27	3137201	3139600	2400	DUP	LOC101116799;LOC106991978	intergenic
27	3140401	3142400	2000	DUP	LOC101116799;LOC106991978	intergenic
27	3147601	3149200	1600	DUP	LOC101116799;LOC106991978	intergenic
27	3150001	3152000	2000	DUP	LOC101116799;LOC106991978	intergenic
27	3163601	3165200	1600	DUP	LOC101116799;LOC106991978	intergenic
27	3178801	3182000	3200	DUP	LOC101116799;LOC106991978	intergenic
27	3184001	3185600	1600	DUP	LOC101116799;LOC106991978	intergenic
27	3185601	3188000	2400	DUP	LOC101116799;LOC106991978	intergenic
27	3191601	3194000	2400	DUP	LOC101116799;LOC106991978	intergenic
27	3210001	3212000	2000	DUP	LOC101116799;LOC106991978	intergenic
27	3218801	3221200	2400	DUP	LOC101116799;LOC106991978	intergenic
27	3234001	3238000	4000	DUP	LOC101116799;LOC106991978	intergenic
27	3242001	3243600	1600	DUP	LOC101116799;LOC106991978	intergenic
27	3252001	3255600	3600	DUP	LOC101116799;LOC106991978	intergenic
27	3260001	3261600	1600	DUP	LOC101116799;LOC106991978	intergenic
27	3263201	3270000	6800	DUP	LOC101116799;LOC106991978	intergenic
27	3276401	3278000	1600	DUP	LOC101116799;LOC106991978	intergenic
27	3280801	3282400	1600	DUP	LOC101116799;LOC106991978	intergenic
27	3293601	3295200	1600	DUP	LOC101116799;LOC106991978	intergenic
27	3297201	3298800	1600	DUP	LOC101116799;LOC106991978	intergenic
27	3316801	3318400	1600	DUP	LOC101116799;LOC106991978	intergenic
[truncated: 779 more rows]

## Sheet: HTS,OTS and VTS shared
Table S3.Detailed information of the detected CNVRs.
chr	start	end	Length	Type	Gene name	Gene type
1	107648401	107650400	2000	DEL	LOC101117985;LOC101118242	intergenic
1	109978801	109981600	2800	DUP	SLAMF1;SLAMF7	intergenic
1	110294001	110296000	2000	DUP	ITLN;ITLN2	intergenic
1	110819601	110823200	3600	DUP	TRNAG-UCC;LOC101106730	intergenic
1	111092801	111096800	4000	DUP	ATF6	intron
1	112332801	112336800	4000	DEL	HSD17B7;CCDC190	intergenic
1	117040801	117050000	9200	DEL	MAEL;GPA33	intergenic
1	126976801	126978400	1600	DUP	LOC105611820;LOC105610400	intergenic
1	131375601	131377600	2000	DEL	TRNAS-GGA;LOC106990865	intergenic
1	135250401	135252400	2000	DEL	TRNAF-GAA;TMPRSS15	intergenic
1	160638001	160646000	8000	DEL	LOC101103944	exon
1	160647201	160661600	14400	DEL	LOC101104620;LOC101104875	intergenic
1	21230401	21238400	8000	DUP	LOC101113120;LOC101105863	intergenic
1	218606001	218607600	1600	DEL	LOC105603542;ZBBX	intergenic
1	222011201	222012800	1600	DEL	LOC101103029;OTOL1	intergenic
1	222320001	222322800	2800	DEL	LOC101103029;OTOL1	intergenic
1	223436001	223439600	3600	DUP	LOC101103029;OTOL1	intergenic
1	230719201	230724000	4800	DEL	TRNAR-UCU;MME	intergenic
1	230801601	230809200	7600	DEL	TRNAR-UCU;MME	intergenic
1	238605201	238608800	3600	DEL	LOC106990808	intron
1	239859601	239861200	1600	DUP	PLSCR5;PLSCR1	intergenic
1	255932401	255938800	6400	DEL	CPNE4	intron
1	257806801	257809600	2800	DEL	IGSF5	intron
1	268320401	268339200	18800	DUP	LOC106990471;KCNJ6	intergenic
1	269019601	269021600	2000	DUP	ETS2;LOC105604974	intergenic
1	269333601	269344000	10400	DUP	LOC101110904;LOC101111156	intergenic
1	34490401	34509600	19200	DEL	LOC101121820;LOC101104943	intergenic
1	3795201	3797200	2000	DUP	TRNAC-ACA;COL6A3	intergenic
1	57993201	57995200	2000	DUP	TRNAC-ACA;ADGRL2	intergenic
1	7125201	7128400	3200	DUP	LOC105616317	intron
1	96837201	96843200	6000	DUP	TRNAC-GCA;LOC101112864	intergenic
1	96920801	96932000	11200	DUP	TRNAN-GUU;LOC101112943	intergenic
1	96933201	96951200	18000	DUP	LOC101112943	intron
1	96959201	96964000	4800	DUP	LOC101112943	intron
1	96964801	96968800	4000	DUP	LOC101112943	intron
1	98476801	98479200	2400	DUP	TRNAQ-CUG;TRNAN-GUU	intergenic
1	98495601	98497200	1600	DUP	TRNAG-CCC;TRNAV-AAC	intergenic
10	38112801	38116400	3600	DEL	ATP12A;PCDH9	intergenic
10	39958001	39960400	2400	DEL	PCDH9	intron
10	44632001	44634000	2000	DEL	KLHL1	intron
10	6792401	6794800	2400	DEL	LOC105610339;PCDH17	intergenic
10	70308401	70313200	4800	DEL	LOC101106781	intron
10	70513201	70519200	6000	DUP	LOC101107030	intron
10	70519601	70681600	162000	DUP	LOC101107030	intron
10	70709601	70724400	14800	DEL	LOC106991387	exon
10	70729201	70738000	8800	DEL	LOC106991387	intron
10	70743601	70745600	2000	DEL	LOC106991387	intron
10	70749601	70752000	2400	DEL	LOC106991387	intron
10	70771601	70780400	8800	DUP	LOC106991366	intron
10	70787601	70791200	3600	DUP	LOC106991366	intron
10	70796801	70802000	5200	DUP	LOC106991366	intron
10	70809201	70834400	25200	DUP	LOC105616215	intron
10	70842001	70856400	14400	DUP	LOC105616215;LOC105601928	intergenic
10	70861201	70866800	5600	DUP	LOC105616215;LOC105601928	intergenic
10	70874401	70876400	2000	DUP	LOC105616215;LOC105601928	intergenic
10	70917601	70920400	2800	DUP	LOC105601928	intron
10	70930001	70932000	2000	DUP	LOC105601928	intron
10	70932801	71038400	105600	DUP	LOC105601928	intron
10	71062001	71068400	6400	DEL	LOC105613864	intron
10	71070001	71086000	16000	DEL	LOC105613864	intron
10	71099601	71103200	3600	DEL	LOC105613864	intron
10	71103201	71106800	3600	DUP	LOC105613864	exon
10	71111601	71175200	63600	DUP	LOC105616214	exon
10	71202001	71252800	50800	DEL	LOC105601928	intron
10	71255201	71260400	5200	DUP	LOC105601928;LOC105614203	intergenic
10	71267601	71269600	2000	DUP	LOC105601928;LOC105614203	intergenic
10	71271601	71278800	7200	DUP	LOC105601928;LOC105614203	intergenic
10	71297201	71304400	7200	DEL	LOC105614203	intron
10	71306801	71309200	2400	DEL	LOC105614203	intron
10	71310001	71312800	2800	DUP	LOC105614203	intron
10	71314401	71316400	2000	DUP	LOC105616213;LOC105614203	intergenic
10	71621601	71623200	1600	DUP	LOC105601884;LOC101109105	intergenic
10	71626001	71630400	4400	DUP	LOC105601884;LOC101109105	intergenic
10	71632401	71634400	2000	DUP	LOC105601884;LOC101109105	intergenic
10	71646801	71662400	15600	DEL	LOC101109105	intron
10	71666401	71680400	14000	DEL	LOC101109105	intron
10	71690801	71696000	5200	DEL	LOC101109105	intron
10	71725201	71742000	16800	DEL	LOC101109105	intron
10	71754001	71757200	3200	DEL	LOC101109105;LOC101109370	intergenic
10	71887601	71889200	1600	DUP	LOC101109370;LOC101109626	intergenic
10	72025201	72028400	3200	DEL	LOC101109626	intron
10	72075601	72077200	1600	DEL	LOC101109626	intron
10	72080401	72083600	3200	DEL	LOC101109626	intron
10	72086001	72089200	3200	DEL	LOC101109626	exon
10	72092401	72096400	4000	DEL	LOC101109890;LOC101109626	intergenic
10	72127201	72134000	6800	DUP	LOC101109890	intron
10	72141601	72145200	3600	DUP	LOC101109890	intron
10	72178801	72182800	4000	DUP	LOC101109890;CLDN10	intergenic
11	18867201	18872400	5200	DEL	LOC101118202;LOC101102156	intergenic
11	23728401	23732000	3600	DUP	LOC101120675;LOC101120421	intergenic
11	2577201	2579600	2400	DEL	KIF2B;CA10	intergenic
11	26876401	26878800	2400	DUP	SHBG;ATP1B2	intergenic
11	34921601	34927600	6000	DEL	KCNJ12;UTP18	intergenic
11	35902001	35905600	3600	DUP	TMEM92;COL1A1	intergenic
11	4001	10000	6000	DUP	CA10	intergenic
11	40820001	40824000	4000	DUP	LOC101115138	intron
11	40826401	40828000	1600	DUP	LOC101115138	intron
11	40907201	40916000	8800	DUP	LOC101115634;LOC101116068	intergenic
11	49643201	49644800	1600	DUP	LOC101106024;LOC101110855	intergenic
11	49652001	49653600	1600	DUP	LOC101110855	intron
11	55732801	55734800	2000	DUP	LOC101103909;LOC101103658	intergenic
11	5902001	5906000	4000	DEL	LOC101122120	intron
11	5933601	5938400	4800	DEL	LOC101122120	intron
12	11865201	11868800	3600	DEL	LOC106990525;LOC105611808	intergenic
12	26142401	26149200	6800	DUP	DNAH14	intron
12	4973601	4975200	1600	DUP	CFH	intron
12	75334801	75339200	4400	DUP	LOC105611348;ATP6V1G3	intergenic
12	75340001	75345200	5200	DUP	LOC105611348;ATP6V1G3	intergenic
12	75642801	75646800	4000	DEL	PTPRC	intron
13	40223201	40225200	2000	DEL	PAX1;LOC105609021	intergenic
13	63073601	63077600	4000	DUP	ASIP	intron
13	67218001	67220000	2000	DEL	FAM83D	intron
13	73383201	73385200	2000	DEL	TKDP5	intron
13	73436001	73448800	12800	DUP	TKDP1	intron
13	75205201	75207200	2000	DUP	EYA2	intron
13	75230401	75234000	3600	DUP	ZMYND8	intron
13	75239601	75246000	6400	DUP	ZMYND8	intron
14	30111601	30113200	1600	DUP	CDH8;CDH11	intergenic
14	48316001	48318800	2800	DUP	EID2;DYRK1B	intergenic
14	48323201	48335600	12400	DUP	EID2;DYRK1B	intergenic
14	48336801	48338800	2000	DUP	EID2;DYRK1B	intergenic
14	49394401	49398400	4000	DUP	ERICH4;LOC101122718	intergenic
14	49715201	49717200	2000	DUP	LOC105616889;LOC101122545	intergenic
14	50712801	50714800	2000	DUP	LOC101108413;LOC101108679	intergenic
14	58132801	58162800	30000	DEL	LOC101111573;LOC101111827	intergenic
14	58424401	58426000	1600	DUP	LOC101113879;LOC101114134	intergenic
14	58565201	58580800	15600	DEL	LOC101115398;LOC101115153	intergenic
14	58666401	58675600	9200	DUP	LOC101116169;LOC105601998	intergenic
14	58677601	58688400	10800	DUP	LOC105601998	intron
14	59756001	59758400	2400	DUP	LOC101103260	intron
14	59762801	59766000	3200	DUP	LOC101103260;LOC101103752	intergenic
14	59783201	59896800	113600	DUP	LOC101104266;LOC105602005	intergenic
14	60688401	60691200	2800	DUP	ZFP28	intron
14	61564401	61569600	5200	DEL	LOC101114805	exon
15	15417201	15420000	2800	DEL	FUT4;PIWIL4	intergenic
15	24662001	24664400	2400	DEL	NXPE2;LOC106990350	intergenic
15	26771201	26778400	7200	DUP	LOC105602190;LOC105602189	intergenic
15	26780801	26784400	3600	DUP	LOC105602190;LOC105602189	intergenic
15	45328401	45331200	2800	DUP	LOC101108077;LOC101108337	intergenic
15	45502801	45506000	3200	DUP	LOC101109119;LOC101109643	intergenic
15	45511201	45514400	3200	DUP	LOC101109119;LOC101109643	intergenic
15	45518001	45526000	8000	DUP	LOC101109119;LOC101109643	intergenic
15	45528001	45541200	13200	DUP	LOC101109119;LOC101109643	intergenic
15	45543201	45547600	4400	DUP	LOC101109119;LOC101109643	intergenic
15	45557201	45562800	5600	DUP	LOC101109119;LOC101109643	intergenic
15	45563601	45566400	2800	DUP	LOC101109119;LOC101109643	intergenic
15	45573601	45591600	18000	DUP	LOC101109119;LOC101109643	intergenic
15	45598001	45603200	5200	DUP	LOC101109119;LOC101109643	intergenic
15	45608401	45618000	9600	DUP	LOC101109119;LOC101109643	intergenic
15	45620801	45624800	4000	DUP	LOC101109119;LOC101109643	intergenic
15	45636801	45679200	42400	DUP	LOC101109643;MRPL17	intergenic
15	46541201	46543600	2400	DEL	LOC101121198;LOC101121451	intergenic
15	47416401	47429200	12800	DEL	LOC101102421;LOC101102671	intergenic
15	47434001	47439200	5200	DEL	LOC101102671;LOC101105185	intergenic
15	47440801	47450000	9200	DEL	LOC101105185;LOC101102928	intergenic
15	47464801	47467600	2800	DUP	LOC101105437;LOC101105945	intergenic
15	49105601	49110000	4400	DUP	LOC105614409;TRNAG-CCC	intergenic
15	49552401	49554800	2400	DUP	CHRNA10	intron
15	49555201	49558400	3200	DUP	CHRNA10	exon
15	76546001	76548400	2400	DEL	LOC101106283;LOC101106033	intergenic
15	76577601	76579200	1600	DUP	LOC101106283;LOC101106033	intergenic
15	77259201	77261600	2400	DUP	LOC101117875	intron
15	77262401	77264400	2000	DUP	LOC101117875	intron
15	77704801	77711200	6400	DUP	LOC101119933	intron
15	79452401	79454400	2000	DUP	LOC101110445;LOC101111392	intergenic
16	2046801	2049200	2400	DUP	DOCK2	intron
16	21350801	21371200	20400	DEL	ACTBL2;PLK2	intergenic
16	31589201	31593600	4400	DUP	LOC105602560;ZNF131	intergenic
16	31612401	31621200	8800	DUP	LOC105602560;ZNF131	intergenic
16	33120401	33122400	2000	DEL	PLCXD3	intron
16	33122801	33125200	2400	DEL	PLCXD3	intron
16	34615201	34619200	4000	DUP	LOC105602672;LOC105602568	intergenic
16	40001	43200	3200	DUP	LOC105602432	exon
16	50801	56000	5200	DUP	LOC105602432;LOC106991654	intergenic
16	59601	69200	9600	DUP	LOC105602432;LOC106991654	intergenic
16	6801	11200	4400	DUP	LOC106991653	intron
16	69796401	69798800	2400	DUP	LOC105602654;LOC105602652	intergenic
16	69802401	69811600	9200	DUP	LOC105602654;LOC105602652	intergenic
16	72401	97200	24800	DUP	LOC105602665;LOC106991654	intergenic
17	13762801	13767200	4400	DUP	LOC105602739;FREM3	intergenic
17	13783601	13790000	6400	DUP	LOC105602739;FREM3	intergenic
17	2167201	2170000	2800	DUP	NPY2R;RBM46	intergenic
17	2171201	2173600	2400	DUP	NPY2R;RBM46	intergenic
17	37772801	37778400	5600	DEL	LOC101111319;FSTL5	intergenic
17	40462001	40465200	3200	DEL	TMEM144	intron
17	70122401	70126000	3600	DUP	LOC106991686;LOC101117536	intergenic
17	70127201	70164800	37600	DUP	LOC101105442;LOC105601877	intergenic
17	70172801	70175600	2800	DUP	-	-
17	70202001	70205200	3200	DUP	LOC101106716;LOC101107996	intergenic
17	70204801	70210400	5600	DEL	LOC101106716;LOC101107996	intergenic
17	70210001	70212400	2400	DUP	LOC101106716;LOC101107996	intergenic
17	70216401	70222400	6000	DUP	LOC101107996;LOC101108519	intergenic
17	70261601	70281600	20000	DUP	ZNF280B	intron
17	70283601	70301200	17600	DUP	-	-
17	70302001	70305200	3200	DUP	LOC101108258	intron
17	70563601	70565200	1600	DUP	LOC106991688	exon
17	7793601	7795200	1600	DUP	LOC105602712;LOC105602713	intergenic
18	13889601	13895600	6000	DEL	TRNAK-CUU;ST8SIA2	intergenic
18	18862401	18867200	4800	DEL	LOC101117021;LOC101123585	intergenic
18	18868401	18870400	2000	DEL	LOC101117021;LOC101123585	intergenic
18	18870801	18872400	1600	DEL	LOC101117021;LOC101123585	intergenic
18	18883601	18889200	5600	DEL	LOC101123585;LOC105603087	intergenic
18	18889601	18894400	4800	DEL	LOC101123585;LOC105603087	intergenic
18	18896001	18899200	3200	DEL	LOC101123585;LOC105603087	intergenic
18	18922001	18924800	2800	DEL	LOC101123585;LOC105603087	intergenic
18	48532801	48535200	2400	DEL	LOC101103187	exon
18	66356001	66358800	2800	DUP	LOC101104348	exon
18	7248401	7250800	2400	DEL	PGPEP1L	intron
18	8062801	8065600	2800	DEL	LOC105603041;LOC101112928	intergenic
19	19482001	19488000	6000	DEL	LOC105603423;GRM7	intergenic
19	25893201	25898800	5600	DEL	CHL1;CNTN6	intergenic
19	32001	44000	12000	DUP	LOC105603319	intergenic
19	33619601	33621200	1600	DEL	FAM19A1;LOC105603452	intergenic
19	34453201	34454800	1600	DUP	KBTBD8;SUCLG2	intergenic
19	53472401	53475200	2800	DUP	SLC6A20	intron
19	8950401	8956000	5600	DUP	LOC105603359;ARPP21	intergenic
2	101744001	101745600	1600	DUP	FBXO16	intron
2	101746401	101750400	4000	DUP	FBXO16	intron
2	101790401	101793200	2800	DUP	FZD3	intron
2	101808801	101812400	3600	DUP	FZD3	exon
2	105077201	105079200	2000	DEL	LOC106990533;GLRA3	intergenic
2	105081601	105090800	9200	DEL	LOC106990533;GLRA3	intergenic
2	111791201	111794800	3600	DUP	LOC101123441;LGSN	intergenic
2	112697201	112708000	10800	DEL	NIPA1;LOC101102534	intergenic
2	113737601	113742800	5200	DUP	FAM168B	intron
2	122139601	122144800	5200	DEL	LOC101122056;ZC3H15	intergenic
2	13720001	13722000	2000	DEL	LOC105606785;LOC101114239	intergenic
2	144267601	144270800	3200	DUP	GRB14;FIGN	intergenic
2	145345201	145352000	6800	DEL	FIGN;KCNH7	intergenic
2	145400401	145405600	5200	DUP	FIGN;KCNH7	intergenic
2	188207601	188211200	3600	DEL	TRNAC-GCA;CNTNAP5	intergenic
2	191034401	191037200	2800	DEL	TRNAW-CCA;LOC105609998	intergenic
2	191164001	191166000	2000	DEL	TRNAW-CCA;LOC105609998	intergenic
2	213671201	213675200	4000	DEL	LOC105611887;ERBB4	intergenic
2	226452401	226455200	2800	DEL	DOCK10;NYAP2	intergenic
2	227716401	227722800	6400	DUP	LOC105610800;IRS1	intergenic
2	24971601	24974400	2800	DUP	LOC105606996;LOC105606997	intergenic
2	25384001	25385600	1600	DEL	LOC105606997;DIRAS2	intergenic
2	42398801	42400800	2000	DUP	LOC105612581;CHMP7	intergenic
2	42418001	42427600	9600	DUP	RHOBTB2	intron
2	46340401	46343600	3200	DUP	LOC105607498;LOC101123612	intergenic
2	4737601	4739600	2000	DEL	TRNAC-GCA;TRNAS-GGA	intergenic
2	53976401	53978800	2400	DUP	LOC101110212;LOC101110483	intergenic
2	55270801	55274800	4000	DUP	LOC101111001;LOC101119878	intergenic
2	55276801	55279200	2400	DUP	LOC101111001;LOC101119878	intergenic
2	55990801	55992800	2000	DEL	LOC101111526;LOC105607767	intergenic
2	56126401	56128800	2400	DEL	LOC101111526	intron
2	573601	579200	5600	DEL	TMEM18;SNTG2	intergenic
2	667201	672400	5200	DEL	SNTG2	intron
2	87543601	87546400	2800	DUP	SLC24A2	intron
2	95596401	95598000	1600	DEL	C2H9orf72;LINGO2	intergenic
2	99753601	99756400	2800	DEL	LOC105608461;LOC105608475	intergenic
20	1849201	1857200	8000	DEL	LOC105603922;PRIM2	intergenic
20	1858401	1860000	1600	DEL	LOC105603922;PRIM2	intergenic
20	20357201	20361200	4000	DEL	ADGRF1;TNFRSF21	intergenic
20	25296801	25300800	4000	DEL	LOC101108696;OVAR-DRB1	intergenic
20	25313601	25316400	2800	DEL	LOC101108696;OVAR-DRB1	intergenic
20	25511601	25522800	11200	DEL	LOC101109492;OVAR-DRB3	intergenic
20	25552401	25558800	6400	DEL	OVAR-DRB3;DQA	intergenic
20	25560801	25585200	24400	DEL	OVAR-DRB3;DQA	intergenic
20	25786001	25790400	4400	DEL	LOC105603751;LOC101110277	intergenic
20	25798001	25806400	8400	DEL	LOC105603751;LOC101110277	intergenic
20	25843201	25846400	3200	DUP	LOC101121635;LOC105603752	intergenic
20	26846401	26864800	18400	DUP	LOC106990117	intron
20	26878801	26888000	9200	DUP	LOC106990117	intron
20	26888801	26898400	9600	DUP	LOC106990117	intron
20	26902001	26966400	64400	DUP	LOC105603775;MICA	intergenic
20	27547201	27548800	1600	DEL	LOC101108432;LOC101110710	intergenic
20	27549601	27552800	3200	DEL	LOC101108432;LOC101110710	intergenic
20	4001	15200	11200	DUP	KHDRBS2	intergenic
20	49844801	49849200	4400	DUP	MYLK4;GMDS	intergenic
21	26764801	26766400	1600	DEL	LOC101113113	exon
21	26845201	26852400	7200	DEL	LOC101114148;LOC101114401	intergenic
21	31133201	31136400	3200	DUP	LOC105604057;ETS1	intergenic
21	4911201	4918400	7200	DEL	LOC101109839;LOC101110373	intergenic
21	9064401	9066000	1600	DEL	CCDC83	intron
22	10065201	10072400	7200	DUP	LOC101122743;LOC101119862	intergenic
22	1304801	1308800	4000	DEL	LOC105604204;ZWINT	intergenic
22	2414401	2418000	3600	DUP	LOC105604204;ZWINT	intergenic
22	2801	7600	4800	DUP	LOC101114149	intergenic
22	30412401	30415200	2800	DEL	SHOC2	intron
22	3854801	3856800	2000	DUP	PCDH15	intron
22	50020801	50022800	2000	DUP	INPP5A	intron
22	801	2400	1600	DUP	LOC101114149	intergenic
23	18649601	18651600	2000	DUP	LOC105604417;LOC106991868	intergenic
23	56673201	56676000	2800	DUP	LOC105604546;WDR7	intergenic
23	62086401	62092800	6400	DUP	LOC101104114;SERPINB11	intergenic
23	77601	85200	7600	DUP	LOC101105794;LOC105613831	intergenic
23	7805201	7806800	1600	DEL	DOK6	intron
24	17845201	17847200	2000	DUP	GPR139;GP2	intergenic
24	22534801	22536800	2000	DUP	SLC5A11	intron
24	35572401	35579200	6800	DEL	LOC105604785	exon
24	38366401	38378800	12400	DUP	LOC101107408	exon
25	12790801	12792400	1600	DUP	LOC105604928;LOC105604933	intergenic
25	12801601	12806400	4800	DUP	LOC105604933;LOC105604932	intergenic
25	1606401	1609600	3200	DUP	GALNT2	intron
25	2001	5200	3200	DUP	RHOU	intergenic
25	2192801	2200400	7600	DEL	LOC106991926;LOC101106652	intergenic
25	28829201	28831200	2000	DEL	PLA2G12B;P4HA1	intergenic
25	36282401	36284000	1600	DEL	SH2D4B;LOC106991931	intergenic
26	1601	4400	2800	DUP	ERICH1	intergenic
26	43527201	43529200	2000	DEL	LOC105605292	intergenic
26	5646801	5650400	3600	DUP	LOC105605298	intron
26	5964001	5969200	5200	DUP	SBD2	intron
27	101065601	101067600	2000	DUP	LOC101115685;LOC105605590	intergenic
27	1012001	1013600	1600	DUP	DHRSX	exon
27	10178801	10180800	2000	DUP	FRMPD4	intron
27	1022801	1024800	2000	DUP	DHRSX	intron
27	1033201	1035600	2400	DUP	DHRSX	intron
27	103453201	103455200	2000	DUP	TRNAE-UUC;TENM1	intergenic
27	1041201	1042800	1600	DUP	DHRSX	intron
27	105436801	105438800	2000	DUP	PRR32;LOC101118761	intergenic
27	1056001	1058400	2400	DUP	DHRSX	intron
27	106483601	106485600	2000	DUP	LOC101119281;LOC106990690	intergenic
27	106948401	106950000	1600	DUP	LOC101119281;LOC106990690	intergenic
27	107056401	107058400	2000	DUP	LOC101119281;LOC106990690	intergenic
27	1072801	1074800	2000	DUP	DHRSX	intron
27	1088001	1090400	2400	DUP	ZBED1;DHRSX	intergenic
27	109234801	109237200	2400	DUP	LOC105610137;SLC25A43	intergenic
27	1097201	1099600	2400	DUP	ZBED1;DHRSX	intergenic
27	109780001	109782000	2000	DUP	IL13RA1	intron
27	110034401	110036000	1600	DUP	LOC101107849;AGTR2	intergenic
27	110055601	110061600	6000	DUP	LOC101107849;AGTR2	intergenic
27	1101601	1103600	2000	DUP	ZBED1;DHRSX	intergenic
27	11082401	11084400	2000	DUP	EGFL6;RAB9A	intergenic
27	111668401	111670400	2000	DUP	TRNAS-GGA;CT83	intergenic
27	1118401	1122400	4000	DUP	ZBED1;CD99	intergenic
27	111972801	111975600	2800	DUP	TRNAS-GGA;CT83	intergenic
27	112385601	112387200	1600	DUP	TRNAS-GGA;CT83	intergenic
27	113499201	113502000	2800	DUP	KLHL4	intron
27	1135201	1136800	1600	DUP	ZBED1;CD99	intergenic
27	1145201	1149600	4400	DUP	ZBED1;CD99	intergenic
27	114589201	114590800	1600	DUP	LOC101108550;AMOT	intergenic
27	114874401	114876000	1600	DUP	LOC101108550;AMOT	intergenic
27	1157601	1160400	2800	DUP	ZBED1;CD99	intergenic
27	1174801	1176800	2000	DUP	CD99	intron
27	119325601	119328000	2400	DUP	COL4A5	intron
27	1207601	1209200	1600	DUP	CD99	intron
27	1223201	1225600	2400	DUP	CD99	exon
27	122846401	122848000	1600	DUP	LOC105605640;IL1RAPL2	intergenic
27	123201	126000	2800	DUP	LOC105605310	intergenic
27	123290801	123292400	1600	DUP	IL1RAPL2	intron
27	1237601	1239600	2000	DUP	XG	intron
27	123816001	123820400	4400	DUP	IL1RAPL2	intron
27	1258401	1260400	2000	DUP	XG;GYG2	intergenic
27	125917601	125924000	6400	DUP	TCEAL6;ZMAT1	intergenic
27	1264801	1269200	4400	DUP	GYG2	intron
27	1273601	1275600	2000	DUP	GYG2	intron
27	127420401	127422800	2400	DEL	LOC101102461;TRNAE-CUC	intergenic
27	1278001	1283600	5600	DUP	GYG2	intron
27	1288401	1290000	1600	DUP	LOC101116024	intron
27	1292401	1301200	8800	DUP	LOC101116024	intron
27	1305201	1308800	3600	DUP	LOC101116024	intron
27	132474401	132476400	2000	DUP	LOC101103955;PCDH11X	intergenic
27	132713201	132716400	3200	DUP	LOC101103955;PCDH11X	intergenic
27	132952401	132956000	3600	DEL	LOC101103955;PCDH11X	intergenic
27	132958401	132960800	2400	DEL	LOC101103955;PCDH11X	intergenic
27	133316401	133318400	2000	DUP	LOC101103955;PCDH11X	intergenic
27	1333201	1337200	4000	DUP	ARSE;LOC101116287	intergenic
27	133881201	133897200	16000	DUP	LOC101112115	intron
27	134106801	134108800	2000	DUP	LOC101112115	intron
27	134713601	134716000	2400	DUP	LOC101105478;PABPC5	intergenic
27	134944001	134945600	1600	DEL	PABPC5	intergenic
27	134951201	134955200	4000	DEL	PABPC5	intergenic
27	134958401	134962800	4400	DEL	PABPC5	intergenic
27	135059201	135060800	1600	DEL	PABPC5	intergenic
27	135064401	135067200	2800	DEL	PABPC5	intergenic
27	135073201	135084400	11200	DEL	PABPC5	intergenic
27	135089601	135100000	10400	DEL	PABPC5	intergenic
27	1352401	1354000	1600	DUP	LOC101116287	intron
27	1372001	1376800	4800	DUP	LOC101116287;LOC105605318	intergenic
27	1381201	1384000	2800	DUP	LOC101116287;LOC105605318	intergenic
27	13828001	13832000	4000	DUP	GRPR;CTPS2	intergenic
27	13976401	13982000	5600	DUP	GRPR;CTPS2	intergenic
27	14001	15600	1600	DUP	LOC105605310	intergenic
27	1407601	1410400	2800	DUP	LOC105605318;MXRA5	intergenic
27	1431601	1435600	4000	DUP	LOC105605318;MXRA5	intergenic
27	1439601	1444000	4400	DUP	LOC105605318;MXRA5	intergenic
27	144801	148400	3600	DUP	LOC105605310	intergenic
27	1474401	1476800	2400	DUP	MXRA5;LOC105605319	intergenic
27	1509201	1510800	1600	DUP	LOC105605319	intron
27	1533601	1536000	2400	DUP	LOC105605321	exon
27	1536001	1538000	2000	DUP	LOC105605321	intron
27	1542801	1546800	4000	DUP	LOC105605321	intron
27	1547201	1549600	2400	DUP	LOC105605321	intron
27	1570001	1574000	4000	DUP	LOC105605320;PRKX	intergenic
27	1583201	1584800	1600	DUP	LOC105605320;PRKX	intergenic
27	1585601	1589600	4000	DUP	LOC105605320;PRKX	intergenic
27	1604801	1607200	2400	DUP	PRKX	intron
27	1617201	1620400	3200	DUP	PRKX	intron
27	1642001	1646000	4000	DUP	LOC105605323;PRKX	intergenic
27	166401	168800	2400	DUP	LOC105605310	intergenic
27	1669601	1672800	3200	DUP	LOC105605323;PRKX	intergenic
27	1695201	1696800	1600	DUP	LOC105605323;PRKX	intergenic
27	171201	172800	1600	DUP	LOC105605310	intergenic
27	1738001	1740800	2800	DUP	LOC105605323;PRKX	intergenic
27	176001	178400	2400	DUP	LOC105605310	intergenic
27	1813201	1816800	3600	DUP	LOC105605323;PRKX	intergenic
27	1818001	1819600	1600	DUP	LOC105605323;PRKX	intergenic
27	1845201	1854800	9600	DUP	LOC105605323;PRKX	intergenic
27	1890401	1892400	2000	DUP	LOC105605323;PRKX	intergenic
27	1895601	1899200	3600	DUP	LOC105605323;PRKX	intergenic
27	1914801	1916400	1600	DUP	LOC105605323;PRKX	intergenic
27	1930401	1932400	2000	DUP	LOC105605323;LOC105605322	intergenic
27	1948401	1950000	1600	DUP	LOC105605323;LOC105605322	intergenic
27	1961201	1963200	2000	DUP	LOC105605322	intron
27	1968801	1972800	4000	DUP	LOC105605322	intron
27	1976401	1978000	1600	DUP	LOC105605322	intron
27	1986001	1988000	2000	DUP	LOC105605322	intron
27	1988801	1991200	2400	DUP	LOC105605322	intron
27	1993601	1996400	2800	DUP	LOC105605322	intron
27	2008401	2013600	5200	DUP	LOC101117055;LOC105605322	intergenic
27	2020801	2022400	1600	DUP	LOC101117055;LOC105605322	intergenic
27	2033601	2035600	2000	DUP	LOC101117055;LOC105605322	intergenic
27	20580801	20582800	2000	DUP	TRNAC-GCA;LOC106991986	intergenic
27	2072801	2076800	4000	DUP	LOC101117055	intron
27	2077601	2082400	4800	DUP	LOC101117055	intron
27	208001	211200	3200	DUP	LOC105605310	intergenic
27	2087601	2090800	3200	DUP	LOC101117055	intron
27	2095601	2098000	2400	DUP	LOC101117055;LOC101116018	intergenic
27	2101601	2104000	2400	DUP	LOC101117055;LOC101116018	intergenic
27	2136401	2140000	3600	DUP	LOC101117055;LOC101116018	intergenic
27	2147201	2151200	4000	DUP	LOC101117055;LOC101116018	intergenic
27	2153201	2155600	2400	DUP	LOC101117055;LOC101116018	intergenic
27	2157601	2160000	2400	DUP	LOC101117055;LOC101116018	intergenic
27	2172001	2174000	2000	DUP	LOC101117055;LOC101116018	intergenic
27	2174401	2177200	2800	DUP	LOC101117055;LOC101116018	intergenic
27	2184001	2186000	2000	DUP	LOC101117055;LOC101116018	intergenic
27	2188801	2190400	1600	DUP	LOC101117055;LOC101116018	intergenic
27	21933601	21938800	5200	DEL	PCYT1B;POLA1	intergenic
27	2193601	2196400	2800	DUP	LOC101117055;LOC101116018	intergenic
27	219601	221200	1600	DUP	LOC105605310	intergenic
27	2205601	2207200	1600	DUP	LOC101117055;LOC101116018	intergenic
27	2220401	2222000	1600	DUP	LOC101117055;LOC101116018	intergenic
27	2227201	2228800	1600	DUP	LOC101117055;LOC101116018	intergenic
27	22546401	22548000	1600	DUP	LOC101109519;ARX	intergenic
27	2254801	2258000	3200	DUP	LOC101117055;LOC101116018	intergenic
27	2267201	2268800	1600	DUP	LOC101117055;LOC101116018	intergenic
27	228401	232000	3600	DUP	LOC105605310	intergenic
27	2295601	2297200	1600	DUP	LOC101117055;LOC101116018	intergenic
27	2323601	2327200	3600	DUP	LOC101117055;LOC101116018	intergenic
27	2333201	2336000	2800	DUP	LOC101117055;LOC101116018	intergenic
27	2351201	2355200	4000	DUP	LOC101117055;LOC101116018	intergenic
27	2380401	2384400	4000	DUP	LOC101117055;LOC101116018	intergenic
27	2385201	2388400	3200	DUP	LOC101117055;LOC101116018	intergenic
27	2395201	2398000	2800	DUP	LOC101117055;LOC101116018	intergenic
27	2406001	2407600	1600	DUP	LOC101117055;LOC101116018	intergenic
27	2410001	2412400	2400	DUP	LOC101117055;LOC101116018	intergenic
27	2428801	2430800	2000	DUP	LOC101117055;LOC101116018	intergenic
27	243201	244800	1600	DUP	LOC105605310	intergenic
27	2456001	2459600	3600	DUP	LOC101117055;LOC101116018	intergenic
27	2460801	2462800	2000	DUP	LOC101117055;LOC101116018	intergenic
27	2464401	2466000	1600	DUP	LOC101117055;LOC101116018	intergenic
27	2480801	2482800	2000	DEL	LOC101117055;LOC101116018	intergenic
27	2504001	2506400	2400	DUP	LOC101116018	intron
27	25108801	25110400	1600	DUP	LOC101116885;LOC101111863	intergenic
27	252401	254800	2400	DUP	LOC105605310	intergenic
27	2526001	2528800	2800	DUP	LOC105605670;LOC101116018	intergenic
27	2529601	2531600	2000	DUP	LOC105605670;LOC101116018	intergenic
27	2532401	2534400	2000	DUP	LOC105605670;LOC101116018	intergenic
27	25329601	25335200	5600	DUP	LOC101116885;IL1RAPL1	intergenic
27	2551601	2556000	4400	DUP	LOC105605670;LOC101116018	intergenic
27	2574001	2576000	2000	DUP	LOC105605670;LOC101116018	intergenic
27	2588001	2590000	2000	DUP	LOC105605670	intron
27	2592801	2595200	2400	DUP	LOC105605670	intron
27	2621601	2630800	9200	DUP	LOC101116281;LOC105605670	intergenic
27	2632401	2634400	2000	DUP	LOC101116281;LOC105605670	intergenic
27	2635601	2639600	4000	DUP	LOC101116281;LOC105605670	intergenic
27	2663601	2665600	2000	DUP	LOC101116281;LOC105605670	intergenic
27	2670001	2673600	3600	DUP	LOC101116281;LOC105605670	intergenic
27	267601	273600	6000	DUP	LOC105605310	intergenic
27	2690001	2692800	2800	DUP	LOC101116281;LOC105605670	intergenic
27	27073201	27074800	1600	DUP	IL1RAPL1	intron
27	275601	277600	2000	DUP	LOC105605310	intergenic
27	2762001	2765200	3200	DUP	LOC101116281;LOC105605670	intergenic
27	2769601	2772800	3200	DUP	LOC101116281;LOC105605670	intergenic
27	2778801	2780400	1600	DUP	LOC101116281;LOC105605670	intergenic
27	2788401	2790400	2000	DUP	LOC101116281;LOC105605670	intergenic
27	280401	282400	2000	DUP	LOC105605310	intergenic
27	2836401	2838000	1600	DUP	LOC101116281;LOC101116537	intergenic
27	2840801	2842400	1600	DUP	LOC101116281;LOC101116537	intergenic
27	2843601	2847200	3600	DUP	LOC101116281;LOC101116537	intergenic
27	2855201	2865200	10000	DUP	LOC101116537;LOC101116799	intergenic
27	285601	287200	1600	DUP	LOC105605310	intergenic
27	2878401	2880000	1600	DUP	LOC101116537;LOC101116799	intergenic
27	28927201	28928800	1600	DUP	DMD	intron
27	2894001	2896000	2000	DUP	LOC101116537;LOC101116799	intergenic
27	2902001	2904800	2800	DUP	LOC101116537;LOC101116799	intergenic
27	291601	294400	2800	DUP	LOC105605310	intergenic
27	2940401	2942800	2400	DUP	LOC101116537;LOC101116799	intergenic
27	2958401	2960800	2400	DUP	LOC101116799;LOC106991978	intergenic
27	2965201	2968400	3200	DUP	LOC101116799;LOC106991978	intergenic
27	2969601	2971600	2000	DUP	LOC101116799;LOC106991978	intergenic
27	2973601	2975600	2000	DUP	LOC101116799;LOC106991978	intergenic
27	2989201	2991600	2400	DUP	LOC101116799;LOC106991978	intergenic
27	3008401	3010000	1600	DUP	LOC101116799;LOC106991978	intergenic
27	301601	304000	2400	DUP	LOC105605310	intergenic
27	3016801	3018400	1600	DUP	LOC101116799;LOC106991978	intergenic
27	3041601	3048400	6800	DUP	LOC101116799;LOC106991978	intergenic
27	3067601	3070800	3200	DUP	LOC101116799;LOC106991978	intergenic
27	307201	308800	1600	DUP	LOC105605310	intergenic
27	3090401	3092400	2000	DUP	LOC101116799;LOC106991978	intergenic
27	3102401	3104000	1600	DUP	LOC101116799;LOC106991978	intergenic
27	3105601	3108400	2800	DUP	LOC101116799;LOC106991978	intergenic
27	3130001	3131600	1600	DUP	LOC101116799;LOC106991978	intergenic
27	3150001	3152000	2000	DUP	LOC101116799;LOC106991978	intergenic
27	31769201	31770800	1600	DUP	LOC101120383;LOC101115436	intergenic
27	3178801	3182000	3200	DUP	LOC101116799;LOC106991978	intergenic
27	3184001	3185600	1600	DUP	LOC101116799;LOC106991978	intergenic
27	3185601	3188000	2400	DUP	LOC101116799;LOC106991978	intergenic
27	3191601	3194000	2400	DUP	LOC101116799;LOC106991978	intergenic
27	3210001	3212000	2000	DUP	LOC101116799;LOC106991978	intergenic
27	3218801	3221200	2400	DUP	LOC101116799;LOC106991978	intergenic
27	3234001	3238000	4000	DUP	LOC101116799;LOC106991978	intergenic
27	3242001	3243600	1600	DUP	LOC101116799;LOC106991978	intergenic
27	3252001	3255600	3600	DUP	LOC101116799;LOC106991978	intergenic
27	3263201	3270000	6800	DUP	LOC101116799;LOC106991978	intergenic
27	327201	329200	2000	DUP	LOC105605310	intergenic
27	3316801	3318400	1600	DUP	LOC101116799;LOC106991978	intergenic
27	3336001	3337600	1600	DUP	LOC101116799;LOC106991978	intergenic
27	3356001	3359200	3200	DUP	LOC101116799;LOC106991978	intergenic
27	3383201	3385600	2400	DUP	LOC101116799;LOC106991978	intergenic
27	3413201	3414800	1600	DUP	LOC106991978;NLGN4X	intergenic
27	3415201	3417200	2000	DUP	LOC106991978;NLGN4X	intergenic
27	3422801	3426000	3200	DUP	LOC106991978;NLGN4X	intergenic
27	3426401	3429200	2800	DUP	LOC106991978;NLGN4X	intergenic
27	34739601	34741600	2000	DUP	LOC101119538	exon
27	3494401	3496400	2000	DUP	NLGN4X	intron
27	3537201	3538800	1600	DUP	NLGN4X	intron
27	3552001	3554800	2800	DUP	NLGN4X	intron
27	356801	359200	2400	DUP	LOC105605310	intergenic
27	3581201	3582800	1600	DUP	NLGN4X	intron
27	3585601	3587200	1600	DUP	NLGN4X	intron
27	3588801	3591600	2800	DUP	NLGN4X	intron
27	3593201	3596400	3200	DUP	NLGN4X	intron
27	3596801	3599200	2400	DUP	NLGN4X	intron
27	3616001	3620800	4800	DUP	NLGN4X	intron
27	3647601	3649200	1600	DUP	NLGN4X	intron
27	3672001	3673600	1600	DUP	NLGN4X	intron
27	3684801	3686400	1600	DUP	NLGN4X	intron
27	3728001	3733600	5600	DUP	NLGN4X	intron
27	376001	379600	3600	DUP	LOC105605310	intergenic
27	3766801	3769600	2800	DUP	NLGN4X	intron
27	3780801	3783600	2800	DUP	NLGN4X	intron
27	3789201	3793600	4400	DUP	NLGN4X	intron
27	3794001	3795600	1600	DUP	NLGN4X	intron
27	38001	40800	2800	DUP	LOC105605310	intergenic
27	3820001	3821600	1600	DUP	NLGN4X	intron
27	3850001	3852000	2000	DUP	PUDP;NLGN4X	intergenic
27	3854801	3856400	1600	DUP	PUDP;NLGN4X	intergenic
27	385601	387200	1600	DUP	LOC105605310	intergenic
27	3871201	3873200	2000	DUP	PUDP;NLGN4X	intergenic
27	3893601	3895200	1600	DUP	PUDP;NLGN4X	intergenic
27	38982401	38984000	1600	DUP	CASK	intron
27	3902401	3904000	1600	DUP	PUDP;NLGN4X	intergenic
27	3908001	3910000	2000	DUP	PUDP;NLGN4X	intergenic
27	3925601	3928000	2400	DUP	PUDP;NLGN4X	intergenic
27	3934001	3935600	1600	DEL	PUDP;NLGN4X	intergenic
27	3957201	3958800	1600	DUP	PUDP;NLGN4X	intergenic
27	3966801	3969600	2800	DUP	PUDP;NLGN4X	intergenic
27	3970801	3977600	6800	DUP	PUDP;NLGN4X	intergenic
27	398401	403600	5200	DUP	LOC105605310	intergenic
27	3985601	3988800	3200	DUP	PUDP;NLGN4X	intergenic
27	3999601	4002800	3200	DUP	PUDP;NLGN4X	intergenic
27	4010001	4012400	2400	DUP	PUDP;NLGN4X	intergenic
27	4047601	4052400	4800	DUP	PUDP;NLGN4X	intergenic
27	4057201	4058800	1600	DUP	PUDP;NLGN4X	intergenic
27	4060801	4062400	1600	DUP	PUDP;NLGN4X	intergenic
27	4070001	4072800	2800	DUP	PUDP;NLGN4X	intergenic
27	4073201	4075200	2000	DUP	PUDP;NLGN4X	intergenic
27	4082401	4086800	4400	DUP	PUDP;NLGN4X	intergenic
27	4095201	4097600	2400	DUP	PUDP;NLGN4X	intergenic
27	4103201	4106800	3600	DUP	PUDP;NLGN4X	intergenic
27	4122801	4125200	2400	DUP	PUDP;NLGN4X	intergenic
27	4136801	4140400	3600	DUP	PUDP;NLGN4X	intergenic
27	4142401	4145600	3200	DUP	PUDP;NLGN4X	intergenic
27	4160801	4164400	3600	DUP	PUDP;NLGN4X	intergenic
27	4169601	4172400	2800	DUP	PUDP;NLGN4X	intergenic
27	4179601	4181200	1600	DUP	PUDP;NLGN4X	intergenic
27	4212001	4214000	2000	DUP	PUDP;NLGN4X	intergenic
27	4215201	4218800	3600	DUP	PUDP;NLGN4X	intergenic
27	4237201	4239200	2000	DUP	PUDP;NLGN4X	intergenic
27	42401	44400	2000	DUP	LOC105605310	intergenic
27	4250001	4254800	4800	DUP	PUDP;NLGN4X	intergenic
27	4275201	4278000	2800	DUP	PUDP;NLGN4X	intergenic
27	4284801	4286400	1600	DUP	PUDP;NLGN4X	intergenic
27	4287601	4289600	2000	DUP	PUDP;NLGN4X	intergenic
27	4299601	4302800	3200	DUP	PUDP;NLGN4X	intergenic
27	4308801	4312400	3600	DUP	PUDP;NLGN4X	intergenic
27	4321201	4325200	4000	DUP	PUDP;NLGN4X	intergenic
27	4338401	4342000	3600	DUP	PUDP;NLGN4X	intergenic
27	43400401	43402800	2400	DUP	LOC101108987	intron
27	4349201	4354000	4800	DUP	PUDP;NLGN4X	intergenic
27	4358401	4362000	3600	DUP	PUDP;NLGN4X	intergenic
27	4399201	4401200	2000	DUP	PUDP;NLGN4X	intergenic
27	4422401	4427200	4800	DUP	PUDP;NLGN4X	intergenic
27	44357201	44358800	1600	DUP	AMER1;ARHGEF9	intergenic
27	4437201	4441600	4400	DUP	PUDP;NLGN4X	intergenic
27	4458401	4461600	3200	DUP	PUDP;NLGN4X	intergenic
27	4470001	4471600	1600	DUP	PUDP;NLGN4X	intergenic
27	4472401	4476800	4400	DUP	PUDP	intron
27	4478801	4480800	2000	DUP	PUDP	intron
27	4484801	4487200	2400	DUP	PUDP	intron
27	4494401	4497600	3200	DUP	PUDP	intron
27	4512001	4514000	2000	DUP	PUDP	intron
27	4518401	4520800	2400	DUP	PUDP	intron
27	4532001	4534800	2800	DUP	STS	intron
27	453601	456800	3200	DUP	LOC105605310;CRLF2	intergenic
27	4536801	4538800	2000	DUP	STS	intron
27	45425601	45430000	4400	DEL	ZC3H12B	intron
27	45431201	45435600	4400	DEL	ZC3H12B	intron
27	4544001	4546400	2400	DUP	STS	intron
27	4557601	4562000	4400	DUP	STS	intron
27	45640001	45642400	2400	DUP	LOC106990308;MSN	intergenic
27	45916401	45918800	2400	DUP	LOC105605676;MSN	intergenic
27	45968401	45970800	2400	DUP	LOC105605676	exon
27	460001	464800	4800	DUP	LOC105605310;CRLF2	intergenic
27	4619201	4621200	2000	DUP	STS	intron
27	46455201	46460000	4800	DEL	LOC101113911;HEPH	intergenic
27	4666001	4668800	2800	DUP	STS	intron
27	4673601	4676800	3200	DUP	STS	intron
27	4679601	4682000	2400	DUP	STS	intron
27	4696401	4699200	2800	DUP	LOC105605334;STS	intergenic
27	4721601	4723200	1600	DUP	LOC105605334;STS	intergenic
27	4731201	4732800	1600	DUP	LOC105605334;STS	intergenic
27	4743601	4747600	4000	DUP	LOC105605334;STS	intergenic
27	476001	477600	1600	DUP	LOC105605310;CRLF2	intergenic
27	4765601	4767600	2000	DUP	LOC105605334;STS	intergenic
27	4789601	4792800	3200	DUP	LOC105605334;STS	intergenic
27	4800001	4804400	4400	DUP	LOC105605334;STS	intergenic
27	4843201	4846400	3200	DUP	LOC105605334;STS	intergenic
27	4850401	4852000	1600	DUP	LOC105605334;STS	intergenic
27	4862001	4864000	2000	DUP	LOC105605334;STS	intergenic
27	4869201	4871200	2000	DUP	LOC105605334;STS	intergenic
27	4872401	4875200	2800	DUP	LOC105605334;STS	intergenic
27	4885601	4889200	3600	DUP	LOC105605334;STS	intergenic
27	4904801	4908000	3200	DUP	LOC105605334;STS	intergenic
27	4914001	4919200	5200	DUP	LOC105605334;STS	intergenic
27	4921201	4923600	2400	DUP	LOC105605334;STS	intergenic
27	4943601	4946000	2400	DUP	LOC105605334;STS	intergenic
27	4967601	4972000	4400	DUP	LOC105605334;STS	intergenic
27	4994001	4996400	2400	DUP	LOC105605334;TRNAC-GCA	intergenic
27	5000801	5003200	2400	DUP	TRNAC-GCA;PNPLA4	intergenic
27	50138001	50142000	4000	DEL	LOC101122329;MAGED1	intergenic
27	50142401	50148000	5600	DEL	LOC101122329;MAGED1	intergenic
27	5050401	5052400	2000	DUP	TRNAC-GCA;PNPLA4	intergenic
27	5060801	5063600	2800	DUP	TRNAC-GCA;PNPLA4	intergenic
27	5075601	5078000	2400	DUP	TRNAC-GCA;PNPLA4	intergenic
27	5078401	5082800	4400	DUP	TRNAC-GCA;PNPLA4	intergenic
27	5096001	5103600	7600	DUP	TRNAC-GCA;PNPLA4	intergenic
27	5131601	5133200	1600	DUP	TRNAC-GCA;PNPLA4	intergenic
27	5138801	5140800	2000	DUP	TRNAC-GCA;PNPLA4	intergenic
27	5149601	5152000	2400	DUP	TRNAC-GCA;PNPLA4	intergenic
27	5152401	5154400	2000	DUP	TRNAC-GCA;PNPLA4	intergenic
27	5155201	5157600	2400	DUP	TRNAC-GCA;PNPLA4	intergenic
27	5162001	5165200	3200	DUP	TRNAC-GCA;PNPLA4	intergenic
27	5174801	5177200	2400	DUP	TRNAC-GCA;PNPLA4	intergenic
27	5202401	5207600	5200	DUP	PNPLA4	intron
27	5252801	5258800	6000	DUP	LOC105605336	intron
27	5264001	5270400	6400	DUP	LOC105605336	intron
27	527601	530000	2400	DUP	LOC101115509	intron
27	5306401	5310400	4000	DUP	LOC105605336	intron
27	5315201	5317200	2000	DUP	LOC105605336	intron
27	5348401	5350800	2400	DUP	LOC105605336	intron
27	5369601	5371200	1600	DUP	LOC105605336	intron
27	5393601	5399600	6000	DUP	LOC105605336	intron
27	5404001	5405600	1600	DUP	LOC105605336	intron
27	5406401	5408000	1600	DUP	LOC105605336	exon
27	5438001	5440800	2800	DUP	LOC105605336	intron
27	54599201	54604000	4800	DUP	SLC9A7;RP2	intergenic
27	5479201	5486000	6800	DUP	LOC105605336	intron
27	5502001	5505200	3200	DUP	LOC105605336	intron
27	5506401	5510000	3600	DUP	LOC105605336	intron
27	5519601	5521200	1600	DUP	LOC105605336	intron
27	5521601	5524000	2400	DUP	LOC105605336	intron
27	5532801	5536800	4000	DUP	LOC105605336	exon
27	5549201	5552400	3200	DUP	LOC105605336	intron
27	555601	563600	8000	DUP	LOC105605313	intron
27	5565601	5570000	4400	DUP	LOC105605336	intron
27	5586001	5588000	2000	DUP	LOC105605336	intron
27	5607601	5610800	3200	DUP	LOC106991979;LOC105605336	intergenic
27	5622001	5623600	1600	DUP	LOC106991979;LOC105605336	intergenic
27	56325601	56339200	13600	DUP	LOC101119962;AR	intergenic
27	5633601	5636800	3200	DUP	LOC106991979;LOC105605336	intergenic
27	5648401	5652400	4000	DUP	LOC106991979;LOC105605336	intergenic
27	5664401	5666000	1600	DUP	LOC106991979;LOC105605335	intergenic
27	5673601	5675600	2000	DUP	LOC106991979;LOC105605335	intergenic
27	5678801	5680400	1600	DUP	LOC106991979;LOC105605335	intergenic
27	5700801	5702400	1600	DUP	LOC106991979;LOC105605335	intergenic
27	5707601	5709200	1600	DUP	LOC106991979;LOC105605335	intergenic
27	57452001	57456400	4400	DUP	OPHN1	intron
27	5747201	5756000	8800	DUP	ANOS1	intron
27	5778801	5781200	2400	DUP	ANOS1	intron
27	5789601	5792000	2400	DUP	ANOS1	intron
27	5792401	5794000	1600	DUP	ANOS1	intron
27	5824001	5827600	3600	DUP	ANOS1	intron
27	5836001	5842400	6400	DUP	ANOS1	intron
27	5843601	5847200	3600	DUP	ANOS1	intron
27	5849601	5853600	4000	DUP	ANOS1	intron
27	5892001	5893600	1600	DUP	ANOS1	intron
27	5894801	5897600	2800	DUP	ANOS1	intron
27	590801	592800	2000	DUP	IL3RA;LOC105605313	intergenic
27	5960801	5964400	3600	DUP	LOC105605337;ANOS1	intergenic
27	5974801	5977200	2400	DUP	LOC105605337;ANOS1	intergenic
27	60308801	60312000	3200	DEL	SLC7A3;SNX12	intergenic
27	60314001	60316400	2400	DEL	SLC7A3;SNX12	intergenic
27	6041601	6044400	2800	DUP	LOC105605337;ANOS1	intergenic
27	6062001	6064000	2000	DUP	LOC105605337;ANOS1	intergenic
27	6064801	6066400	1600	DUP	LOC105605337;ANOS1	intergenic
27	6086001	6087600	1600	DUP	LOC105605337;ANOS1	intergenic
27	6089201	6092800	3600	DUP	LOC105605337;ANOS1	intergenic
27	6100001	6101600	1600	DUP	LOC105605337;ANOS1	intergenic
27	6118401	6120000	1600	DUP	LOC105605337;ANOS1	intergenic
27	6127201	6130000	2800	DUP	LOC105605337;ANOS1	intergenic
27	6152401	6154400	2000	DUP	LOC105605337;ANOS1	intergenic
27	6160401	6164000	3600	DUP	LOC105605337;ANOS1	intergenic
27	61605601	61608400	2800	DUP	HDAC8	intron
27	6172001	6174800	2800	DUP	LOC105605337;ANOS1	intergenic
27	6176001	6177600	1600	DUP	LOC105605337;ANOS1	intergenic
27	6185201	6187200	2000	DUP	LOC105605337;ANOS1	intergenic
27	619201	621600	2400	DUP	SLC25A6	intron
27	6203201	6208400	5200	DUP	LOC105605337;ANOS1	intergenic
27	6232401	6234000	1600	DUP	LOC105605337;ANOS1	intergenic
27	6235201	6239200	4000	DUP	LOC105605337;ANOS1	intergenic
27	6274401	6276000	1600	DUP	LOC105605337;ANOS1	intergenic
27	6306401	6308000	1600	DUP	LOC105605337;ANOS1	intergenic
27	6346001	6347600	1600	DUP	LOC105605337;ANOS1	intergenic
27	6364401	6368000	3600	DUP	LOC105605337;ANOS1	intergenic
27	6373201	6376400	3200	DUP	LOC105605337;ANOS1	intergenic
27	63794801	63797600	2800	DUP	LOC101115345;ABCB7	intergenic
27	6384801	6389200	4400	DUP	LOC105605337;ANOS1	intergenic
27	6390001	6401200	11200	DUP	LOC105605337;ANOS1	intergenic
27	63996001	63999600	3600	DUP	ZDHHC15	intron
27	6403601	6407200	3600	DUP	LOC105605337;ANOS1	intergenic
27	6414001	6417200	3200	DUP	LOC105605337;ANOS1	intergenic
27	6418801	6422000	3200	DUP	LOC105605337;ANOS1	intergenic
27	6426001	6429200	3200	DUP	LOC105605337;ANOS1	intergenic
27	64285601	64287200	1600	DUP	MAGEE2;ATP7A	intergenic
27	644001	647200	3200	DUP	P2RY8	exon
27	6448401	6450800	2400	DUP	LOC105605337;ANOS1	intergenic
27	6459601	6466800	7200	DUP	LOC105605337;ANOS1	intergenic
27	6480401	6483200	2800	DUP	LOC105605337	intron
27	6490401	6493600	3200	DUP	LOC105605337	intron
27	6497201	6499600	2400	DUP	LOC105605337;TBL1X	intergenic
27	65032801	65034400	1600	DUP	FGF16;PBDC1	intergenic
27	650801	652400	1600	DUP	P2RY8	intron
27	6533601	6535600	2000	DUP	LOC105605337;TBL1X	intergenic
27	6536801	6538400	1600	DUP	LOC105605337;TBL1X	intergenic
27	65372801	65375600	2800	DUP	FGF16;PBDC1	intergenic
27	6539201	6540800	1600	DUP	LOC105605337;TBL1X	intergenic
27	6547201	6548800	1600	DUP	LOC105605337;TBL1X	intergenic
27	6562801	6566400	3600	DUP	LOC105605337;TBL1X	intergenic
27	6567601	6570400	2800	DUP	LOC105605337;TBL1X	intergenic
27	6570401	6573600	3200	DUP	LOC105605337;TBL1X	intergenic
27	65842801	65844400	1600	DUP	LOC101106237;LOC105605515	intergenic
27	6584801	6586400	1600	DUP	LOC105605337;TBL1X	intergenic
27	65873601	65876800	3200	DUP	LOC105605515	intron
27	6610801	6615600	4800	DUP	TBL1X	intron
27	6626001	6628400	2400	DUP	TBL1X	intron
27	6678001	6682400	4400	DUP	TBL1X	intron
27	6694001	6697600	3600	DUP	TBL1X	intron
27	6710001	6712400	2400	DUP	TBL1X	intron
27	6723601	6726400	2800	DUP	TBL1X	intron
27	6727601	6731200	3600	DUP	TBL1X	intron
27	6732401	6735200	2800	DUP	TBL1X	intron
27	6748401	6752000	3600	DUP	TBL1X	intron
27	6756801	6759200	2400	DUP	TBL1X	intron
27	6766001	6767600	1600	DUP	TBL1X	intron
27	6772801	6776800	4000	DUP	TBL1X	intron
27	67781601	67783200	1600	DUP	FAM46D;BRWD3	intergenic
27	6784001	6785600	1600	DUP	TBL1X	intron
27	6798401	6800000	1600	DUP	TBL1X	intron
27	6801	10000	3200	DUP	LOC105605310	intergenic
27	6803201	6804800	1600	DUP	TBL1X	intron
27	680401	686000	5600	DUP	P2RY8;AKAP17A	intergenic
27	6820401	6822400	2000	DUP	TBL1X	intron
27	6837201	6848800	11600	DUP	TBL1X	intron
27	6854801	6859200	4400	DUP	GPR143;TBL1X	intergenic
27	6867201	6872400	5200	DUP	GPR143	exon
27	6879601	6898800	19200	DUP	GPR143;SHROOM2	intergenic
27	68924401	68930800	6400	DUP	POU3F4;LOC101109338	intergenic
27	6913601	6915600	2000	DUP	GPR143;SHROOM2	intergenic
27	6927601	6932400	4800	DUP	GPR143;SHROOM2	intergenic
27	692801	696400	3600	DUP	P2RY8;AKAP17A	intergenic
27	6941601	6943200	1600	DUP	GPR143;SHROOM2	intergenic
27	6962801	6966000	3200	DUP	GPR143;SHROOM2	intergenic
27	69730401	69732400	2000	DUP	POU3F4;LOC101109338	intergenic
27	6978401	6980400	2000	DUP	SHROOM2	exon
27	69791201	69792800	1600	DUP	POU3F4;LOC101109338	intergenic
27	6982401	6985600	3200	DUP	SHROOM2	intron
27	6988001	6990000	2000	DUP	SHROOM2	intron
27	6996401	6999200	2800	DUP	SHROOM2	intron
27	7000401	7003200	2800	DUP	SHROOM2	intron
27	70192001	70194400	2400	DUP	POU3F4;LOC101109338	intergenic
27	7047201	7048800	1600	DUP	SHROOM2	intron
27	7084801	7093200	8400	DUP	LOC105605341;LOC105605344	intergenic
27	709201	711600	2400	DUP	P2RY8;AKAP17A	intergenic
27	7093601	7096800	3200	DUP	LOC105605341;LOC105605344	intergenic
27	71163601	71166400	2800	DUP	CYLC1;RPS6KA6	intergenic
27	712801	715600	2800	DUP	P2RY8;AKAP17A	intergenic
27	71356401	71358800	2400	DUP	HDX;RPS6KA6	intergenic
27	71549201	71550800	1600	DUP	HDX;RPS6KA6	intergenic
27	720401	723200	2800	DUP	P2RY8;AKAP17A	intergenic
27	72726801	72728400	1600	DUP	APOOL;LOC105605519	intergenic
27	72792401	72794400	2000	DUP	APOOL	intron
27	73466401	73468400	2000	DUP	TRNAC-GCA;CHM	intergenic
27	737601	739200	1600	DUP	AKAP17A;ASMT	intergenic
27	73841201	73843600	2400	DUP	CHM;DACH2	intergenic
27	73891601	73894800	3200	DUP	CHM;DACH2	intergenic
27	742001	746800	4800	DUP	AKAP17A;ASMT	intergenic
27	747601	750800	3200	DUP	ASMT	intron
27	74970801	74975600	4800	DUP	LOC106990655;LOC101103296	intergenic
27	75081601	75083600	2000	DUP	LOC101103296;LOC101114248	intergenic
27	76001	78400	2400	DUP	LOC105605310	intergenic
27	76418001	76420800	2800	DUP	LOC101106825;LOC105605697	intergenic
27	76430001	76434000	4000	DUP	LOC101106825;LOC105605697	intergenic
27	76505201	76507200	2000	DUP	LOC101106825;LOC105605697	intergenic
27	76522401	76526400	4000	DUP	LOC101106825;LOC105605697	intergenic
27	76594401	76596800	2400	DUP	LOC101106825;LOC105605697	intergenic
27	76612001	76614800	2800	DUP	LOC101106825;LOC105605697	intergenic
27	76618401	76620400	2000	DEL	LOC101106825;LOC105605697	intergenic
27	76812401	76817600	5200	DUP	LOC105605535;LOC101118592	intergenic
27	76819201	76824800	5600	DUP	LOC105605535;LOC101118592	intergenic
27	76825601	76833600	8000	DUP	LOC105605535;LOC101118592	intergenic
27	76845201	76847200	2000	DUP	LOC105605535;LOC101118592	intergenic
27	768801	770800	2000	DUP	ASMT	intron
27	76900801	76902400	1600	DUP	LOC101118592	intron
27	773201	775200	2000	DUP	ASMT	intron
27	77980001	77983200	3200	DUP	ZNF275;LOC106991973	intergenic
27	77993201	77995200	2000	DUP	ZNF275;LOC106991973	intergenic
27	77998801	78012800	14000	DUP	ZNF275;LOC106991973	intergenic
27	78019601	78028800	9200	DUP	LOC106991973	intron
27	78032401	78051200	18800	DUP	LOC106991973;LOC101112292	intergenic
27	78052401	78069200	16800	DUP	LOC101112292	intron
27	78070801	78077200	6400	DUP	LOC101104379	intron
27	788401	792800	4400	DUP	ASMT;LOC106990378	intergenic
27	800001	802800	2800	DUP	ASMT;LOC106990378	intergenic
27	81786801	81788400	1600	DUP	AFF2	intron
27	829601	834400	4800	DUP	ASMT;LOC106990378	intergenic
27	842401	844000	1600	DUP	ASMT;LOC106990378	intergenic
27	846001	852000	6000	DUP	ASMT;LOC106990378	intergenic
27	85367601	85370000	2400	DUP	LOC101112889;TRNAC-GCA	intergenic
27	857601	861600	4000	DUP	ASMT;LOC106990378	intergenic
27	86001	97200	11200	DUP	LOC105605310	intergenic
27	864001	866400	2400	DUP	ASMT;LOC106990378	intergenic
27	86600801	86604000	3200	DUP	GLUD1;SLITRK4	intergenic
27	876001	879200	3200	DUP	ASMT;LOC106990378	intergenic
27	87904801	87906800	2000	DUP	SLITRK4;LOC106991976	intergenic
27	88238001	88240800	2800	DUP	SLITRK4;LOC106991976	intergenic
27	89342801	89345600	2800	DUP	LOC101113919;CDR1	intergenic
27	90827601	90830800	3200	DUP	LOC101115438;FGF13	intergenic
27	9113601	9115200	1600	DUP	ARHGAP6	intron
27	920401	922400	2000	DEL	LOC106990378	intron
27	923201	925600	2400	DUP	LOC106990378	intron
27	93790401	93792000	1600	DUP	FHL1	intron
27	938001	941200	3200	DUP	LOC106990378	intron
27	945601	951600	6000	DUP	LOC106990378	intron
27	961201	963600	2400	DUP	LOC106990378;DHRSX	intergenic
27	97229201	97230800	1600	DUP	MBNL3	intron
27	992401	997600	5200	DUP	DHRSX	intron
3	119153601	119166400	12800	DUP	LOC101104054	intron
3	119169201	119174800	5600	DUP	LOC101104054	intron
3	136893601	136895600	2000	DEL	WNT10B;ARF3	intergenic
3	141187601	141192400	4800	DEL	DBX2	intron
3	146267601	146271200	3600	DUP	MUC19	exon
3	149308801	149310800	2000	DUP	LOC105611569;CNOT2	intergenic
3	157191601	157194000	2400	DEL	FAM19A2	intron
3	157198401	157201600	3200	DEL	FAM19A2	intron
3	158004001	158006800	2800	DEL	LOC106991000;FAM19A2	intergenic
3	158248001	158256800	8800	DUP	LOC106991000;FAM19A2	intergenic
3	163382801	163388000	5200	DEL	LOC101106418;LOC101107184	intergenic
3	163416401	163420400	4000	DEL	LOC101106418;LOC101107184	intergenic
3	163988801	163992000	3200	DEL	LOC101118518;LOC101112895	intergenic
3	163994801	164006000	11200	DEL	LOC101118518;LOC101112895	intergenic
3	164316401	164322800	6400	DEL	LOC101115450;LOC101119808	intergenic
3	168630801	168634400	3600	DEL	ANKS1B	intron
3	177305201	177306800	1600	DEL	LOC105614803;LOC105608626	intergenic
3	177896401	177898000	1600	DUP	LOC105608626;TRNAR-CCU	intergenic
3	179218801	179222400	3600	DEL	LOC106991083;LOC101121414	intergenic
3	179232401	179235200	2800	DEL	LOC106991083;LOC101121414	intergenic
3	181220401	181225200	4800	DEL	SYT10;PKP2	intergenic
3	181226801	181246400	19600	DEL	SYT10;PKP2	intergenic
3	203162401	203165600	3200	DEL	LOC101120233;LOC101114093	intergenic
3	203972801	203978400	5600	DEL	LOC101123288;LOC101116896	intergenic
3	205414001	205418800	4800	DUP	LOC101104740	intron
3	205438401	205440000	1600	DUP	LOC105614850	intron
3	205441601	205461200	19600	DUP	LOC105614850	intron
3	206398401	206402400	4000	DUP	LOC106990118	intron
3	206783601	206786800	3200	DUP	EM4B;LOC105614851	intergenic
3	206820801	206823600	2800	DUP	LOC105614851	intron
3	213426001	213427600	1600	DEL	EIF3L	intron
3	220179201	220180800	1600	DEL	-	-
3	220191601	220196800	5200	DEL	-	-
3	220204401	220212400	8000	DEL	-	-
3	220212801	220273200	60400	DEL	-	-
3	222854001	222855600	1600	DEL	LOC105610817;LOC101112390	intergenic
3	39191601	39193200	1600	DUP	LOC105613207	exon
3	52704801	52706400	1600	DEL	TRNAC-GCA;CTNNA2	intergenic
3	92937201	92942800	5600	DEL	PAIP2B;ZNF638	intergenic
3	98602401	98604800	2400	DEL	LOC105612338;TMEM182	intergenic
4	10319201	10322000	2800	DUP	LOC106991118;CDK6	intergenic
4	10330001	10333600	3600	DUP	LOC101112306	exon
4	105914401	105929600	15200	DEL	LOC101122595	exon
4	106874401	106879600	5200	DEL	LOC105612482;LOC101119716	intergenic
4	112226001	112228400	2400	DUP	LOC105614569;LOC105615133	intergenic
4	112350001	112353200	3200	DUP	LOC101123031	intron
4	112400001	112404400	4400	DUP	LOC101123031;LOC101123290	intergenic
4	112411201	112414000	2800	DUP	LOC101123290	exon
4	112433201	112440000	6800	DUP	LOC101123290;LOC105615175	intergenic
4	1140801	1143200	2400	DEL	TRNAC-GCA;VSTM2A	intergenic
4	118558801	118560800	2000	DUP	LOC105609743;NCAPG2	intergenic
4	163201	220800	57600	DEL	LOC106990711;VSTM2A	intergenic
4	32841601	32845200	3600	DEL	LOC101122517	intron
4	59148801	59152400	3600	DUP	DNAJB9;LOC105613666	intergenic
4	72317601	72319600	2000	DEL	SRI;STEAP4	intergenic
4	7504801	7507600	2800	DEL	LOC105614936;UPP1	intergenic
4	801	47600	46800	DEL	LOC106990711	intergenic
4	83715601	83719600	4000	DEL	TRNAS-GGA;ANKRD7	intergenic
5	107829601	107833600	4000	DUP	STARD4	intergenic
5	11724801	11727600	2800	DEL	LOC101111882;LOC101112395	intergenic
5	11733601	11754000	20400	DEL	LOC101111882;LOC101112395	intergenic
5	26157201	26161600	4400	DEL	LOC105615239	intron
5	33111201	33113200	2000	DEL	LOC105611204	intron
5	8685601	8687600	2000	DEL	LOC101112979;LOC101113494	intergenic
5	8688001	8689600	1600	DEL	LOC101112979;LOC101113494	intergenic
5	97140801	97144400	3600	DUP	FAM174A;ST8SIA4	intergenic
5	98205201	98209200	4000	DEL	TRNAC-GCA;LOC105609305	intergenic
6	110336001	110345200	9200	DUP	BST1	intron
6	110351201	110366000	14800	DUP	-	-
6	110374001	110380800	6800	DUP	-	-
6	110606001	110609200	3200	DEL	PROM1	intron
6	11188001	11193600	5600	DEL	TRNAK-CUU;UGT8	intergenic
6	1333201	1337200	4000	DEL	LOC105613737;MARCH1	intergenic
6	17757601	17760000	2400	DEL	LOC106991223;TRNAS-GGA	intergenic
6	25187201	25189200	2000	DEL	LOC101111713	intron
6	26641601	26643600	2000	DEL	PDHA2;LOC106990267	intergenic
6	30160401	30162000	1600	DEL	HPGDS;PDLIM5	intergenic
6	30162401	30165200	2800	DEL	HPGDS;PDLIM5	intergenic
6	47086401	47089200	2800	DEL	LOC101106847;LOC105612659	intergenic
6	54976001	54979600	3600	DEL	TRNAC-GCA;ARAP2	intergenic
6	5635601	5644800	9200	DUP	MAD2L1;PDE5A	intergenic
6	61422801	61428000	5200	DEL	ATP8A1;GRXCR1	intergenic
6	66445601	66451600	6000	DUP	CORIN	intron
6	74348401	74354000	5600	DEL	TRNAC-GCA;ADGRL3	intergenic
7	22316001	22324400	8400	DUP	-	-
7	22325601	22337600	12000	DUP	-	-
7	22342401	22354400	12000	DUP	-	-
7	22365201	22369200	4000	DUP	-	-
7	22383201	22392400	9200	DUP	-	-
7	22496801	22505200	8400	DUP	-	-
7	22505601	22514400	8800	DUP	-	-
7	22518001	22526800	8800	DUP	-	-
7	22537201	22541600	4400	DUP	-	-
7	22551201	22558400	7200	DUP	-	-
7	22566801	22568800	2000	DUP	-	-
7	22569201	22685200	116000	DUP	LOC106991256	exon
7	22732001	22735200	3200	DUP	LOC101113415;LOC101106775	intergenic
7	22762401	22764400	2000	DUP	LOC101113415;LOC101106775	intergenic
7	23719201	23722800	3600	DUP	RNASE10;LOC105613766	intergenic
7	32154801	32156800	2000	DEL	LOC101106173;THBS1	intergenic
7	33772801	33774800	2000	DUP	LOC105615677	exon
7	38073601	38076400	2800	DEL	TRNAC-ACA;LOC105613304	intergenic
7	61532401	61534800	2400	DEL	LOC101113241;SEMA6D	intergenic
7	99945201	99953600	8400	DUP	C7H15orf43	intron
8	16330801	16334000	3200	DUP	LOC105615953;LOC105612144	intergenic
8	2228401	2236000	7600	DUP	FILIP1	intron
8	2260001	2268000	8000	DUP	FILIP1	intron
8	2287601	2430400	142800	DUP	SENP6	exon
8	73786801	73792000	5200	DUP	LRP11;LOC101105006	intergenic
8	73802801	73804800	2000	DUP	LRP11;LOC101105006	intergenic
8	73806001	73808400	2400	DUP	LOC101105006	exon
8	73810401	73822000	11600	DUP	LOC101105006;LOC101105258	intergenic
8	7822401	7829200	6800	DEL	FAM46A;BCKDHB	intergenic
8	997201	1001600	4400	DEL	CD109;LOC105612327	intergenic
9	10942001	10944400	2400	DEL	EYS;PHF3	intergenic
9	12272001	12278000	6000	DUP	EYS;PHF3	intergenic
9	12401	14800	2400	DUP	LOC105615961;LOC105613741	intergenic
9	13046001	13053600	7600	DUP	LOC106991342;LOC105612928	intergenic
9	13068801	13071200	2400	DUP	LOC105612928	intron
9	13073601	13077600	4000	DUP	LOC105612928	intron
9	13434801	13437200	2400	DUP	SLC39A4;CPSF1	intergenic
9	16001	22400	6400	DUP	LOC105615961;LOC105613741	intergenic
9	252401	258400	6000	DUP	LOC101121783;LOC105616106	intergenic
9	26563601	26566400	2800	DEL	LOC106991346;LOC105614550	intergenic
9	35096401	35100000	3600	DUP	LOC101114620	intron
9	39479601	39481200	1600	DUP	LOC105616033	exon
9	428801	430800	2000	DUP	LOC105616107;DDX43	intergenic
9	6995201	7000800	5600	DEL	TRNAS-GGA;ADGRB3	intergenic
9	7656801	7660800	4000	DEL	TRNAS-GGA;ADGRB3	intergenic
9	7661601	7664400	2800	DEL	TRNAS-GGA;ADGRB3	intergenic
9	7672801	7676800	4000	DEL	TRNAS-GGA;ADGRB3	intergenic
9	7678001	7687600	9600	DEL	TRNAS-GGA;ADGRB3	intergenic
9	7689201	7691600	2400	DEL	TRNAS-GGA;ADGRB3	intergenic
9	81021201	81028400	7200	DEL	TRNAG-CCC;TRNAW-CCA	intergenic
9	85854801	85857600	2800	DEL	LOC105609758;TMEM55A	intergenic
9	89619201	89626000	6800	DUP	LOC101113601	intron
9	89627601	89633600	6000	DUP	LOC101113601;LOC101113860	intergenic
9	89634801	89636800	2000	DUP	LOC101113601;LOC101113860	intergenic
9	89637601	89640800	3200	DEL	LOC101113601;LOC101113860	intergenic
9	89641601	89649200	7600	DUP	LOC101113601;LOC101113860	intergenic
9	94568401	94570000	1600	DUP	SNTB1	intergenic

## Sheet: HTS and OTS shared
Table S3.Detailed information of the detected CNVRs.
chr	start	end	Length	Type	Gene name	Gene type
1	107626001	107627600	1600	DEL	LOC101112179;LOC101117985	intergenic
1	115461201	115463200	2000	DUP	LOC101109142;RXRG	intergenic
1	141051601	141053600	2000	DEL	LOC101122496	intron
1	209329201	209331200	2000	DEL	NAALADL2	intron
1	21247601	21249200	1600	DUP	LOC101105863	intron
1	220259201	220261600	2400	DEL	SI	intron
1	222006401	222008400	2000	DEL	LOC101103029;OTOL1	intergenic
1	237119201	237122400	3200	DEL	TRNAC-ACA;CPA3	intergenic
1	24547601	24550800	3200	DUP	ELAVL4;DMRTA2	intergenic
1	61746401	61748400	2000	DEL	DDAH1	intron
1	65634801	65636400	1600	DUP	LOC105614852;LOC101119773	intergenic
1	65641601	65644400	2800	DUP	LOC105614852;LOC101113817	intergenic
1	70672001	70676000	4000	DEL	ABCD3	intron
1	71967601	71971200	3600	DUP	TRNAC-GCA;RWDD3	intergenic
1	87784401	87786400	2000	DEL	LOC101106738;LOC101113807	intergenic
1	98511601	98513600	2000	DUP	LOC105615522	intron
10	28602801	28604400	1600	DEL	PDS5B	intron
10	36086001	36087600	1600	DUP	IFT88	intron
10	407201	408800	1600	DEL	LOC101118284;PCDH20	intergenic
10	546001	548000	2000	DEL	LOC101118284;PCDH20	intergenic
10	70270001	70272800	2800	DEL	LOC101106781	intron
10	70316801	70322000	5200	DEL	LOC101106781	intron
10	70411201	70417600	6400	DEL	LOC101106781	intron
10	70422401	70426000	3600	DEL	LOC101106781	intron
10	70694001	70696800	2800	DEL	LOC106991387	intron
10	70707601	70709200	1600	DEL	LOC106991387	intron
10	70753201	70758000	4800	DEL	LOC106991387;LOC106991366	intergenic
10	70901601	70905200	3600	DUP	LOC105601928	intron
10	70926001	70927600	1600	DUP	LOC105601928	intron
10	71178801	71180400	1600	DEL	LOC105601928	intron
10	71181601	71184400	2800	DEL	LOC105601928	intron
10	71186401	71190400	4000	DEL	LOC105601928	intron
10	71195201	71198400	3200	DEL	LOC105601928	intron
10	71687201	71689200	2000	DEL	LOC101109105	intron
10	72124401	72126000	1600	DUP	LOC101109890	intron
10	75041601	75043200	1600	DUP	DOCK9	intron
11	15146401	15148000	1600	DEL	CCL1;TMEM132E	intergenic
12	12496001	12497600	1600	DEL	LOC106990525;LOC105611808	intergenic
12	39092401	39094000	1600	DUP	TNFSF4;AADACL4	intergenic
12	4975601	4979200	3600	DUP	CFH	intron
12	4988401	4990000	1600	DUP	CFH	intron
12	5524401	5527200	2800	DUP	KCNT2	intron
12	5546801	5548400	1600	DUP	LOC101116246;KCNT2	intergenic
12	5548801	5551200	2400	DUP	LOC101116246;KCNT2	intergenic
12	5835601	5837200	1600	DUP	TRNAC-GCA;LOC101117007	intergenic
13	6127201	6129200	2000	DEL	SPTLC3	intron
13	61805201	61808000	2800	DUP	LOC105614410;LOC101114720	intergenic
13	63123201	63126000	2800	DEL	ASIP	intron
14	14618001	14621200	3200	DEL	MYLK3	intron
14	33117601	33119200	1600	DUP	LOC105616860;CDH5	intergenic
14	50710001	50712000	2000	DUP	LOC101108413;LOC101108679	intergenic
14	58130401	58132000	1600	DEL	LOC101111573;LOC101111827	intergenic
14	58318001	58319600	1600	DUP	LOC101117868	exon
14	58341601	58344400	2800	DUP	LOC101113357;LOC101113619	intergenic
14	59581601	59584800	3200	DUP	LOC101123578	intron
14	59586001	59587600	1600	DUP	LOC101123578	exon
14	59733601	59735200	1600	DEL	LOC101102754;LOC101103007	intergenic
15	38703601	38705200	1600	DUP	PTH	intron
15	45507601	45510000	2400	DUP	LOC101109119;LOC101109643	intergenic
15	45550001	45553200	3200	DUP	LOC101109119;LOC101109643	intergenic
15	45554801	45556800	2000	DUP	LOC101109119;LOC101109643	intergenic
15	45570401	45572400	2000	DUP	LOC101109119;LOC101109643	intergenic
15	45632401	45635600	3200	DUP	LOC101109119;LOC101109643	intergenic
15	47359601	47361200	1600	DEL	LOC101104931;LOC101104424	intergenic
16	51691601	51695600	4000	DEL	CDH18;CDH12	intergenic
16	5169201	5171200	2000	DUP	BOD1;STC2	intergenic
16	58746401	58748400	2000	DUP	LOC106991670;FAM105A	intergenic
16	64583201	64585200	2000	DEL	TRNAC-GCA;MTRR	intergenic
16	64588001	64590000	2000	DEL	TRNAC-GCA;MTRR	intergenic
16	64602001	64604800	2800	DEL	TRNAC-GCA;MTRR	intergenic
17	14253601	14255600	2000	DUP	USP38;GAB1	intergenic
17	33048801	33051200	2400	DEL	LOC105602798;ANKRD50	intergenic
17	35810801	35812800	2000	DUP	TRPC3;FSTL5	intergenic
17	38396401	38398400	2000	DEL	LOC101111319;FSTL5	intergenic
17	5901601	5903600	2000	DUP	GATB	intron
17	70196001	70202000	6000	DEL	LOC101106716;LOC101107996	intergenic
18	28390001	28392400	2400	DEL	LOC106991735;CHRNA7	intergenic
18	38218801	38220800	2000	DUP	LOC106991725	intron
18	4809201	4811200	2000	DEL	LOC105603025;ALDH1A3	intergenic
18	74001	76400	2400	DUP	MKRN3	intergenic
19	1520801	1524000	3200	DUP	NEK10	intron
19	4296001	4299600	3600	DEL	RBMS3	intron
2	130015201	130017200	2000	DUP	LOC101122330	exon
2	155135601	155137200	1600	DUP	TRNAC-ACA;GALNT13	intergenic
2	168336401	168338400	2000	DEL	LRP1B	intron
2	191160801	191163200	2400	DEL	TRNAW-CCA;LOC105609998	intergenic
2	195334801	195338400	3600	DEL	LOC105610070;LOC106990202	intergenic
2	200538401	200540000	1600	DUP	LOC106990596;SATB2	intergenic
2	21530801	21532400	1600	DUP	TMEM246;RNF20	intergenic
2	228964801	228970000	5200	DUP	CCL20;LOC101104046	intergenic
2	37900401	37902400	2000	DUP	SMU1	intron
2	79746401	79754800	8400	DEL	TRNAC-GCA;PTPRD	intergenic
2	79996801	79999200	2400	DEL	TRNAC-GCA;PTPRD	intergenic
20	25413201	25417200	4000	DEL	LOC101109220;LOC105603927	intergenic
20	27538001	27539600	1600	DEL	LOC101108432;LOC101110710	intergenic
20	27679601	27681200	1600	DUP	OLA-I;LOC101110973	intergenic
20	27968401	27974800	6400	DEL	LOC101113705;GABBR1	intergenic
20	27976801	27982800	6000	DEL	LOC101113705;GABBR1	intergenic
20	27982801	27985200	2400	DEL	LOC101113705;GABBR1	intergenic
20	27985601	27990400	4800	DEL	LOC101113705;GABBR1	intergenic
20	29589201	29590800	1600	DEL	LOC105603936;LOC105603801	intergenic
20	32903201	32905200	2000	DUP	TRNAC-GCA;LOC101119768	intergenic
20	991601	996800	5200	DEL	KHDRBS2	intron
21	37542001	37545600	3600	DUP	LOC105604082	exon
21	46458001	46459600	1600	DUP	ANO1	intron
21	49010001	49012000	2000	DUP	IFITM10;KRTAP5.4	intergenic
22	10062401	10064400	2000	DUP	LOC101122743;LOC101119862	intergenic
22	11394001	11395600	1600	DUP	HTR7;KIF20B	intergenic
22	3407601	3409600	2000	DEL	PCDH15	intron
23	46544001	46546000	2000	DEL	LOXHD1	intron
24	2484001	2485600	1600	DEL	LOC101120293;LOC105604623	intergenic
24	2490001	2493600	3600	DEL	LOC101120293;LOC105604623	intergenic
25	12808001	12809600	1600	DUP	LOC105604933;LOC105604932	intergenic
25	12927601	12929600	2000	DUP	LOC105604929;LOC101119014	intergenic
25	1678001	1679600	1600	DUP	PGBD5;GALNT2	intergenic
25	43755201	43756800	1600	DEL	44263	intron
26	25376801	25380000	3200	DEL	GTF2E2	intron
27	105411201	105412800	1600	DEL	PRR32;LOC101118761	intergenic
27	106572001	106573600	1600	DUP	LOC101119281;LOC106990690	intergenic
27	107756401	107758000	1600	DUP	LOC105605603;XPNPEP2	intergenic
27	111036801	111038400	1600	DUP	KLHL13	intron
27	1133201	1134800	1600	DUP	ZBED1;CD99	intergenic
27	1182801	1185200	2400	DUP	CD99	intron
27	119194401	119196400	2000	DUP	LOC101114850;IRS4	intergenic
27	119457201	119458800	1600	DUP	COL4A5	intron
27	122321601	122323600	2000	DEL	CYSLTR1	intron
27	122517201	122518800	1600	DUP	FAM199X	intron
27	127423601	127428000	4400	DEL	LOC101102461;TRNAE-CUC	intergenic
27	134938401	134940800	2400	DEL	PABPC5	intergenic
27	140001	141600	1600	DUP	LOC105605310	intergenic
27	162401	164000	1600	DUP	LOC105605310	intergenic
27	1780801	1784800	4000	DUP	LOC105605323;PRKX	intergenic
27	1843601	1845200	1600	DUP	LOC105605323;PRKX	intergenic
27	2178801	2181200	2400	DUP	LOC101117055;LOC101116018	intergenic
27	2261601	2266400	4800	DUP	LOC101117055;LOC101116018	intergenic
27	2286801	2288400	1600	DUP	LOC101117055;LOC101116018	intergenic
27	2349201	2350800	1600	DUP	LOC101117055;LOC101116018	intergenic
27	2368801	2370400	1600	DUP	LOC101117055;LOC101116018	intergenic
27	2391201	2393200	2000	DUP	LOC101117055;LOC101116018	intergenic
27	24144801	24146400	1600	DUP	TRNAC-ACA;LOC105605406	intergenic
27	24762401	24764400	2000	DUP	TRNAC-ACA;LOC101111610	intergenic
27	263601	265200	1600	DUP	LOC105605310	intergenic
27	2658401	2660400	2000	DUP	LOC101116281;LOC105605670	intergenic
27	2720801	2722400	1600	DUP	LOC101116281;LOC105605670	intergenic
27	2827601	2829200	1600	DUP	LOC101116281	intron
27	2880801	2882400	1600	DUP	LOC101116537;LOC101116799	intergenic
27	2885601	2887200	1600	DUP	LOC101116537;LOC101116799	intergenic
27	2907601	2909200	1600	DUP	LOC101116537;LOC101116799	intergenic
27	3137201	3139600	2400	DUP	LOC101116799;LOC106991978	intergenic
27	322401	324800	2400	DUP	LOC105605310	intergenic
27	34401	36800	2400	DUP	LOC105605310	intergenic
27	3449601	3451600	2000	DUP	NLGN4X	intron
27	3471201	3475200	4000	DUP	NLGN4X	intron
27	3570801	3572400	1600	DUP	NLGN4X	intron
27	3577601	3579600	2000	DUP	NLGN4X	intron
27	3674001	3675600	1600	DUP	NLGN4X	intron
27	3691601	3693200	1600	DUP	NLGN4X	intron
27	3784001	3786000	2000	DUP	NLGN4X	intron
27	3862801	3864400	1600	DUP	PUDP;NLGN4X	intergenic
27	3876801	3878400	1600	DUP	PUDP;NLGN4X	intergenic
27	3946001	3948000	2000	DUP	PUDP;NLGN4X	intergenic
27	4005201	4007600	2400	DUP	PUDP;NLGN4X	intergenic
27	4017201	4019600	2400	DUP	PUDP;NLGN4X	intergenic
27	4151201	4153600	2400	DUP	PUDP;NLGN4X	intergenic
27	42431201	42432800	1600	DUP	CXHXorf36;LOC105605445	intergenic
27	4293201	4294800	1600	DUP	PUDP;NLGN4X	intergenic
27	43061201	43062800	1600	DUP	LOC105605445;ZNF674	intergenic
27	4490801	4492800	2000	DUP	PUDP	intron
27	4607601	4609200	1600	DUP	STS	intron
27	46848801	46850800	2000	DUP	LOC105605452;UBQLN2	intergenic
27	4740001	4742000	2000	DUP	LOC105605334;STS	intergenic
27	486801	489200	2400	DUP	CRLF2	intron
27	48793601	48795200	1600	DUP	FAM120C	intron
27	494001	496400	2400	DUP	CRLF2	intron
27	5015201	5018400	3200	DUP	TRNAC-GCA;PNPLA4	intergenic
27	5056401	5058000	1600	DUP	TRNAC-GCA;PNPLA4	intergenic
27	508001	509600	1600	DUP	CRLF2;LOC101115509	intergenic
27	517601	520800	3200	DUP	CRLF2;LOC101115509	intergenic
27	5182001	5184000	2000	DUP	TRNAC-GCA;PNPLA4	intergenic
27	51961201	51963600	2400	DUP	AKAP4	intron
27	53565201	53568400	3200	DEL	LOC101115603;SPACA5	intergenic
27	5387201	5389600	2400	DUP	LOC105605336	intron
27	5430001	5431600	1600	DUP	LOC105605336	intron
27	5558801	5561200	2400	DUP	LOC105605336	intron
27	55712001	55713600	1600	DUP	LOC101119962;EDA2R	intergenic
27	5582401	5584000	1600	DUP	LOC105605336	intron
27	5602001	5603600	1600	DUP	LOC106991979;LOC105605336	intergenic
27	5624801	5626800	2000	DUP	LOC106991979;LOC105605336	intergenic
27	5767201	5769200	2000	DUP	ANOS1	intron
27	57821601	57824000	2400	DUP	OPHN1	intron
27	57934001	57936400	2400	DUP	YIPF6;OPHN1	intergenic
27	5798801	5800400	1600	DUP	ANOS1	intron
27	5830801	5832400	1600	DUP	ANOS1	intron
27	5860001	5862000	2000	DUP	ANOS1	intron
27	5898001	5900000	2000	DUP	ANOS1	intron
27	59060001	59061600	1600	DUP	FAM155B;EDA	intergenic
27	6036001	6038000	2000	DUP	LOC105605337;ANOS1	intergenic
27	6059601	6061600	2000	DUP	LOC105605337;ANOS1	intergenic
27	6169601	6171200	1600	DUP	LOC105605337;ANOS1	intergenic
27	6253601	6255200	1600	DUP	LOC105605337;ANOS1	intergenic
27	6352801	6354800	2000	DUP	LOC105605337;ANOS1	intergenic
27	6377201	6382800	5600	DUP	LOC105605337;ANOS1	intergenic
27	63944401	63946400	2000	DUP	UPRT;ZDHHC15	intergenic
27	6434001	6436400	2400	DUP	LOC105605337;ANOS1	intergenic
27	6438001	6440400	2400	DUP	LOC105605337;ANOS1	intergenic
27	6605601	6607200	1600	DUP	LOC105605337;TBL1X	intergenic
27	6656801	6659200	2400	DUP	TBL1X	intron
27	6662401	6664000	1600	DUP	TBL1X	intron
27	6672001	6673600	1600	DUP	TBL1X	intron
27	6739601	6741600	2000	DUP	TBL1X	intron
27	67557201	67558800	1600	DUP	TBX22;FAM46D	intergenic
27	6826401	6828000	1600	DUP	TBL1X	intron
27	6968801	6970400	1600	DUP	GPR143;SHROOM2	intergenic
27	7064801	7066800	2000	DUP	LOC105605341;SHROOM2	intergenic
27	73484401	73486400	2000	DUP	TRNAC-GCA;CHM	intergenic
27	74306001	74307600	1600	DUP	DACH2	intron
27	76553601	76556800	3200	DEL	LOC101106825;LOC105605697	intergenic
27	776001	778800	2800	DUP	ASMT	intron
27	78014401	78016400	2000	DUP	ZNF275;LOC106991973	intergenic
27	78016801	78018800	2000	DUP	ZNF275;LOC106991973	intergenic
27	79295201	79296800	1600	DEL	PASD1	intron
27	809201	810800	1600	DUP	ASMT;LOC106990378	intergenic
27	82990401	82992400	2000	DUP	FMR1;LOC101112382	intergenic
27	898801	900800	2000	DUP	ASMT;LOC106990378	intergenic
27	95398801	95400400	1600	DUP	CCDC160;PHF6	intergenic
27	97269201	97270800	1600	DUP	RAP2C;MBNL3	intergenic
27	973601	975200	1600	DUP	LOC106990378;DHRSX	intergenic
27	97938001	97940000	2000	DUP	LOC101120556;LOC101120813	intergenic
3	119873601	119875600	2000	DUP	LOC105614909;LOC105614910	intergenic
3	123050001	123052000	2000	DEL	C3H12orf50;MGAT4C	intergenic
3	137410401	137412000	1600	DEL	LOC101123547;LOC101101975	intergenic
3	160956401	160961200	4800	DEL	LOC105614768;LRIG3	intergenic
3	163886801	163888800	2000	DUP	LOC101111875;LOC101118006	intergenic
3	179228001	179230400	2400	DUP	LOC106991083;LOC101121414	intergenic
3	205420801	205422800	2000	DUP	LOC101104740;LOC105614850	intergenic
3	206675201	206677200	2000	DEL	LOC105608603	intron
3	206806801	206810400	3600	DUP	LOC105614851	intron
3	206811201	206813600	2400	DUP	LOC105614851	intron
3	206816801	206818400	1600	DUP	LOC105614851	intron
3	220187601	220190800	3200	DEL	-	-
3	47079201	47081200	2000	DEL	C3H2orf74;LRRTM4	intergenic
3	53896001	53898400	2400	DUP	TRNAC-GCA;SUCLG1	intergenic
3	59228801	59230400	1600	DUP	LOC105606419;PAX8	intergenic
3	69834401	69836000	1600	DUP	LOC105613853	intron
3	7465201	7466800	1600	DUP	CCBL1;C3H9orf114	intergenic
4	105315201	105318800	3600	DUP	LOC101116984;LOC101119040	intergenic
4	112218001	112220000	2000	DUP	LOC105614569;LOC105615133	intergenic
4	112396801	112399200	2400	DUP	LOC101123031;LOC101123290	intergenic
4	27430001	27432800	2800	DUP	TRNAS-GGA;HDAC9	intergenic
4	45009201	45011200	2000	DUP	RELN	intron
4	72929201	72931600	2400	DEL	ZNF804B	intron
4	83712801	83715200	2400	DEL	TRNAS-GGA;ANKRD7	intergenic
4	84740801	84742800	2000	DUP	KCND2	intron
5	31363201	31364800	1600	DEL	FAM170A;PRR16	intergenic
5	33108001	33110800	2800	DEL	LOC105611204	intron
5	38970401	38972000	1600	DEL	LOC101118610;LOC101118872	intergenic
5	61971201	61972800	1600	DEL	NMUR2;GRIA1	intergenic
5	842001	844000	2000	DEL	LOC105615179	intron
6	110602401	110605200	2800	DEL	PROM1	intron
6	114686001	114688400	2400	DUP	LOC106991219;HGFAC	intergenic
6	18624401	18626400	2000	DUP	GIMD1;DKK2	intergenic
6	26847201	26848800	1600	DEL	PDHA2;LOC106990267	intergenic
6	31753601	31755600	2000	DEL	GRID2	intron
6	47082401	47084000	1600	DEL	LOC101106847;LOC105612659	intergenic
6	52655601	52657200	1600	DEL	TRNAC-GCA;TRNAC-GCA	intergenic
6	5395601	5397200	1600	DEL	MAD2L1;PRDM5	intergenic
6	61419201	61422000	2800	DEL	ATP8A1;GRXCR1	intergenic
6	84501601	84504000	2400	DUP	LOC101122788	intron
6	84776001	84778800	2800	DEL	UGT2A1;SULT1B1	intergenic
7	22401601	22410800	9200	DUP	-	-
7	22545201	22548400	3200	DUP	-	-
7	22726401	22729600	3200	DUP	LOC101113153;LOC101113415	intergenic
7	3628001	3630000	2000	DUP	TRIM36;KCNN2	intergenic
7	66612801	66614400	1600	DEL	LOC106991261	intron
7	70828801	70831200	2400	DEL	LOC101118878;SNAPC1	intergenic
7	801	2400	1600	DUP	TRNAK-UUU	intergenic
7	97819601	97821200	1600	DUP	FOXN3	intron
8	17333601	17335600	2000	DEL	LOC101122794;TBC1D32	intergenic
8	46824801	46826400	1600	DUP	MAP3K7	exon
8	825601	827600	2000	DEL	CD109;LOC105612327	intergenic
9	13058801	13060800	2000	DUP	LOC106991342;LOC105612928	intergenic
9	26549601	26551600	2000	DUP	LOC106991346;LOC105614550	intergenic
9	73530001	73534000	4000	DEL	DCAF13	intron
9	90960801	90962800	2000	DUP	LOC105610835	intron

## Sheet: HTS and VTS shared
Table S3.Detailed information of the detected CNVRs.
chr	start	end		Type	Gene name	Gene type
1	101946001	101948000	2000	DUP	LOC105615728;LOC106990856	intergenic
1	101980401	101982000	1600	DUP	LOC105615733;LELP1	intergenic
1	110267601	110269600	2000	DUP	ITLN;CD244	intergenic
1	110853201	110854800	1600	DEL	TRNAG-UCC;LOC101106730	intergenic
1	127163601	127165600	2000	DEL	LOC105611820;TRNAS-GGA	intergenic
1	134572401	134574800	2400	DEL	NCAM2;LOC101120465	intergenic
1	147826401	147828800	2400	DEL	TRNAS-GGA;GBE1	intergenic
1	151695601	151697600	2000	DUP	CADM2	intron
1	169171601	169173200	1600	DEL	CBLB;LOC105612549	intergenic
1	181636401	181638400	2000	DUP	TRNAS-GGA;LOC101104286	intergenic
1	206424801	206427200	2400	DEL	KCNMB2	intron
1	234515601	234526000	10400	DUP	LOC101116443;IGSF10	intergenic
1	249439201	249440800	1600	DUP	SOX14;LOC105604262	intergenic
1	249441201	249443200	2000	DUP	SOX14;LOC105604262	intergenic
1	270231601	270233200	1600	DUP	-	-
1	65855201	65856800	1600	DUP	LOC101114077;LOC101114579	intergenic
1	89862401	89864400	2000	DEL	MAGI3	intron
10	126801	130000	3200	DUP	LOC101118284;PCDH20	intergenic
10	2210801	2212400	1600	DEL	TDRD3;DIAPH3	intergenic
10	62068001	62070400	2400	DUP	TRNAR-CCU;TRNAQ-CUG	intergenic
10	71040001	71042800	2800	DEL	LOC105601928	intron
10	71053201	71056800	3600	DEL	LOC105613864	intron
10	71596801	71600000	3200	DUP	LOC106991389	intron
10	71609201	71611600	2400	DUP	LOC105601884	intron
10	71644801	71646400	1600	DUP	LOC101109105	exon
10	71683201	71685600	2400	DEL	LOC101109105	intron
10	71721601	71723200	1600	DUP	LOC101109105	exon
10	71869201	71870800	1600	DUP	LOC101109370	intron
10	71920401	71922400	2000	DUP	LOC101109626	intron
10	72000001	72002000	2000	DEL	LOC101109626	intron
10	72115201	72117600	2400	DUP	LOC101109890	intron
10	72149201	72151200	2000	DUP	LOC101109890	intron
11	16570801	16572400	1600	DEL	ASIC2	intron
11	43808001	43809600	1600	DEL	CCDC43;DBF4B	intergenic
11	47484001	47485600	1600	DUP	LOC101122803;GH	intergenic
11	47586801	47588400	1600	DUP	ICAM2	intron
11	47602801	47604400	1600	DUP	LOC101102254	intron
11	49648801	49650400	1600	DUP	LOC101110855	intron
12	52217201	52218800	1600	DUP	LOC101111473;LOC105613543	intergenic
13	43897201	43898800	1600	DEL	LOC105611099;PITRM1	intergenic
13	62838801	62840400	1600	DUP	LOC105606907	intron
13	62841601	62843200	1600	DUP	LOC105606907	intron
13	62843601	62850800	7200	DUP	LOC105606907	intron
13	62852001	62854400	2400	DUP	LOC105606907	intron
13	62857201	62859600	2400	DUP	LOC105606907	intron
13	62860401	62864000	3600	DUP	LOC105606907	intron
13	62868001	62869600	1600	DUP	LOC105606907;LOC101111988	intergenic
13	62938801	62940400	1600	DEL	LOC101111988	exon
13	63154001	63156000	2000	DUP	AHCY	intron
13	63193201	63194800	1600	DEL	AHCY;ITCH	intergenic
13	63231201	63233600	2400	DEL	AHCY;ITCH	intergenic
13	63238801	63241600	2800	DUP	AHCY;ITCH	intergenic
13	9710801	9712400	1600	DEL	KIF16B	intron
14	48319601	48321200	1600	DUP	EID2;DYRK1B	intergenic
14	49401601	49403600	2000	DUP	ERICH4;LOC101122718	intergenic
14	53908001	53909600	1600	DUP	LOC106991572	exon
14	57202401	57204400	2000	DUP	LOC101107626;LOC101107891	intergenic
14	58314001	58316800	2800	DUP	LOC101117868	intron
14	58351601	58353200	1600	DUP	LOC101113619	intron
14	58360801	58362400	1600	DUP	LOC101113619	exon
14	59725601	59728400	2800	DUP	LOC101102754	intron
14	59771601	59773200	1600	DUP	LOC101103260;LOC101103752	intergenic
15	24656401	24660000	3600	DEL	NXPE2;LOC106990350	intergenic
15	2605201	2608000	2800	DEL	LOC101117013;GRIA4	intergenic
15	2698401	2702000	3600	DEL	LOC101117013;GRIA4	intergenic
15	44102801	44106000	3200	DEL	LOC101109996;LOC101103264	intergenic
15	45515601	45517200	1600	DUP	LOC101109119;LOC101109643	intergenic
15	47482001	47483600	1600	DUP	LOC101105437;LOC101105945	intergenic
15	6621601	6623600	2000	DEL	ANGPTL5;TRPC6	intergenic
15	76522401	76524400	2000	DUP	LOC101105526;LOC101106033	intergenic
15	76730401	76736400	6000	DEL	LOC101109120;LOC101109389	intergenic
15	77714401	77716400	2000	DUP	LOC101119933;LOC101105274	intergenic
16	1201	3600	2400	DUP	LOC106991653	intergenic
16	13601	15200	1600	DUP	LOC106991653	exon
16	57725201	57727600	2400	DEL	FBXL7;LOC105602617	intergenic
17	1219201	1221200	2000	DEL	CPE;TLL1	intergenic
17	20545601	20547200	1600	DEL	TRNAW-CCA;PCDH18	intergenic
17	37786401	37788400	2000	DEL	LOC101111319;FSTL5	intergenic
18	1056401	1058800	2400	DEL	LOC101114216	intron
18	18873201	18874800	1600	DEL	LOC101117021;LOC101123585	intergenic
18	18929201	18932000	2800	DUP	LOC105603087;LOC101118056	intergenic
18	18933601	18946000	12400	DUP	LOC105603087;LOC101118056	intergenic
18	50940001	50941600	1600	DEL	LOC101104431;LRFN5	intergenic
18	62602801	62605200	2400	DEL	TRNAS-GGA;BCL11B	intergenic
18	66517601	66519600	2000	DEL	LOC106990142;EIF5	intergenic
19	26416001	26417600	1600	DUP	CHL1;CNTN3	intergenic
19	32047601	32050000	2400	DUP	MITF;FRMD4B	intergenic
19	53766401	53768000	1600	DEL	LARS2	intron
19	58553601	58556000	2400	DEL	LOC105603597;NUP210	intergenic
19	60410001	60411600	1600	DUP	CFAP100;KLF15	intergenic
2	101801201	101802800	1600	DUP	FZD3	intron
2	108624401	108626400	2000	DEL	TRNAS-GGA;GALNTL6	intergenic
2	137471201	137473200	2000	DEL	TLK1	intron
2	174612001	174613600	1600	DEL	RAB3GAP1	intron
2	190718401	190720400	2000	DUP	TRNAW-CCA;LOC105609998	intergenic
2	190770401	190772000	1600	DUP	TRNAW-CCA;LOC105609998	intergenic
2	212933201	212936000	2800	DEL	ERBB4	intron
2	246980001	246982000	2000	DEL	LOC106990975;KLHDC7A	intergenic
2	38384401	38386000	1600	DUP	STMN4	intron
2	89255601	89257600	2000	DUP	LOC101106658;TP-1	intergenic
20	1201201	1203600	2400	DEL	LOC105603922;KHDRBS2	intergenic
20	1204801	1212800	8000	DEL	LOC105603922;KHDRBS2	intergenic
20	1516401	1518400	2000	DEL	LOC105603922;KHDRBS2	intergenic
20	27965601	27967200	1600	DEL	LOC101113705;GABBR1	intergenic
20	28033201	28034800	1600	DUP	LOC101111325;LOC101113965	intergenic
20	50294801	50296800	2000	DUP	TRNAS-GGA;FOXC1	intergenic
20	50350401	50352000	1600	DUP	TRNAS-GGA;LOC106990336	intergenic
20	50365201	50366800	1600	DUP	TRNAS-GGA;LOC106990336	intergenic
20	50400801	50403200	2400	DUP	TRNAS-GGA;LOC106990336	intergenic
20	50403201	50404800	1600	DUP	TRNAS-GGA;LOC106990336	intergenic
20	50447601	50449600	2000	DUP	LOC105603915	intron
20	917201	918800	1600	DEL	KHDRBS2	intron
21	37021201	37022800	1600	DUP	PAG11	intron
21	4918801	4923200	4400	DEL	LOC101110373	exon
22	15886401	15888000	1600	DUP	LOC101106985;LOC101107486	intergenic
22	25763201	25765200	2000	DEL	SORCS3;SORCS1	intergenic
22	25768001	25770000	2000	DEL	SORCS3;SORCS1	intergenic
22	32810001	32812000	2000	DUP	HABP2;TCF7L2	intergenic
23	23330401	23332000	1600	DEL	NOL4	intron
24	23191201	23192800	1600	DUP	LOC101108538;HS3ST4	intergenic
24	9696001	9697600	1600	DUP	CLEC16A	intron
25	2845601	2847600	2000	DUP	LOC105613978;LOC105604893	intergenic
25	28833201	28836800	3600	DEL	PLA2G12B;P4HA1	intergenic
26	13688001	13689600	1600	DUP	CASP3;IRF2	intergenic
26	33808801	33810400	1600	DEL	C26H8orf4;ZMAT4	intergenic
27	1064801	1066400	1600	DUP	DHRSX	intron
27	1080801	1082800	2000	DUP	DHRSX	intron
27	1084001	1085600	1600	DUP	DHRSX	intron
27	1093201	1095600	2400	DUP	ZBED1;DHRSX	intergenic
27	1137201	1138800	1600	DUP	ZBED1;CD99	intergenic
27	114570001	114572000	2000	DUP	LOC101108550;AMOT	intergenic
27	11666001	11668400	2400	DUP	LOC105605360;LOC106990383	intergenic
27	1179201	1180800	1600	DUP	CD99	intron
27	118660001	118662000	2000	DUP	KCNE5;NXT2	intergenic
27	1192001	1193600	1600	DUP	CD99	intron
27	121029601	121031600	2000	DUP	RBM41;MORC4	intergenic
27	121100001	121101600	1600	DUP	RBM41;MORC4	intergenic
27	1240801	1242800	2000	DUP	XG	intron
27	12553201	12554800	1600	DUP	LOC101122834;TRNAS-GGA	intergenic
27	129201	131200	2000	DUP	LOC105605310	intergenic
27	1310401	1312000	1600	DUP	LOC101116024	intron
27	131800001	131801600	1600	DUP	LOC101103955;PCDH11X	intergenic
27	132521601	132523200	1600	DEL	LOC101103955;PCDH11X	intergenic
27	134946001	134949600	3600	DEL	PABPC5	intergenic
27	135053601	135055200	1600	DUP	PABPC5	intergenic
27	1355201	1357200	2000	DUP	LOC101116287	intron
27	1394001	1395600	1600	DUP	LOC105605318	exon
27	1479601	1483600	4000	DUP	MXRA5;LOC105605319	intergenic
27	1530801	1532400	1600	DUP	LOC105605321	exon
27	153201	155200	2000	DUP	LOC105605310	intergenic
27	1563201	1565200	2000	DUP	LOC105605320;PRKX	intergenic
27	1566001	1567600	1600	DUP	LOC105605320;PRKX	intergenic
27	1592401	1594000	1600	DUP	LOC105605320;PRKX	intergenic
27	1636001	1638400	2400	DUP	LOC105605323;PRKX	intergenic
27	1662001	1663600	1600	DUP	LOC105605323;PRKX	intergenic
27	1771201	1772800	1600	DUP	LOC105605323;PRKX	intergenic
27	1786401	1788000	1600	DUP	LOC105605323;PRKX	intergenic
27	1858001	1860400	2400	DUP	LOC105605323;PRKX	intergenic
27	1863601	1866000	2400	DUP	LOC105605323;PRKX	intergenic
27	189601	191200	1600	DUP	LOC105605310	intergenic
27	1926001	1928000	2000	DUP	LOC105605323;LOC105605322	intergenic
27	2026801	2028400	1600	DUP	LOC101117055;LOC105605322	intergenic
27	2051201	2053200	2000	DUP	LOC101117055;LOC105605322	intergenic
27	20948001	20950000	2000	DUP	PRDX4;PTCHD1	intergenic
27	2105601	2107200	1600	DUP	LOC101117055;LOC101116018	intergenic
27	2131601	2133600	2000	DUP	LOC101117055;LOC101116018	intergenic
27	2284401	2286000	1600	DUP	LOC101117055;LOC101116018	intergenic
27	2337601	2339200	1600	DUP	LOC101117055;LOC101116018	intergenic
27	2344001	2346400	2400	DUP	LOC101117055;LOC101116018	intergenic
27	2447201	2449200	2000	DUP	LOC101117055;LOC101116018	intergenic
27	2469201	2471600	2400	DUP	LOC101117055;LOC101116018	intergenic
27	25078001	25079600	1600	DUP	LOC101116885;LOC101111863	intergenic
27	2511201	2512800	1600	DUP	LOC101116018	intron
27	2541601	2543600	2000	DUP	LOC105605670;LOC101116018	intergenic
27	2576001	2577600	1600	DUP	LOC105605670;LOC101116018	intergenic
27	26333601	26335200	1600	DUP	IL1RAPL1	intron
27	2648401	2650400	2000	DUP	LOC101116281;LOC105605670	intergenic
27	2818401	2820000	1600	DUP	LOC101116281;LOC105605670	intergenic
27	2888001	2890400	2400	DUP	LOC101116537;LOC101116799	intergenic
27	2897601	2899200	1600	DUP	LOC101116537;LOC101116799	intergenic
27	2933201	2935200	2000	DUP	LOC101116537;LOC101116799	intergenic
27	2938001	2939600	1600	DUP	LOC101116537;LOC101116799	intergenic
27	3140401	3142400	2000	DUP	LOC101116799;LOC106991978	intergenic
27	3163601	3165200	1600	DUP	LOC101116799;LOC106991978	intergenic
27	3260001	3261600	1600	DUP	LOC101116799;LOC106991978	intergenic
27	3293601	3295200	1600	DUP	LOC101116799;LOC106991978	intergenic
27	3297201	3298800	1600	DUP	LOC101116799;LOC106991978	intergenic
27	3406801	3408800	2000	DUP	LOC106991978;NLGN4X	intergenic
27	34381601	34383200	1600	DUP	LOC105605424;PRRG1	intergenic
27	3454001	3456800	2800	DUP	NLGN4X	intron
27	3513601	3515600	2000	DUP	NLGN4X	intron
27	35666001	35668000	2000	DUP	LOC101123349	exon
27	3638401	3640400	2000	DUP	NLGN4X	intron
27	3738001	3741600	3600	DUP	NLGN4X	intron
27	3753601	3755200	1600	DUP	NLGN4X	intron
27	3760801	3762400	1600	DUP	NLGN4X	intron
27	3796401	3798400	2000	DUP	NLGN4X	intron
27	3823201	3824800	1600	DUP	NLGN4X	intron
27	3844401	3847600	3200	DUP	PUDP;NLGN4X	intergenic
27	3904801	3906400	1600	DUP	PUDP;NLGN4X	intergenic
27	3913601	3915200	1600	DUP	PUDP;NLGN4X	intergenic
27	4021201	4023200	2000	DUP	PUDP;NLGN4X	intergenic
27	4025601	4028400	2800	DUP	PUDP;NLGN4X	intergenic
27	410801	412800	2000	DUP	LOC105605310	intergenic
27	4175201	4176800	1600	DUP	PUDP;NLGN4X	intergenic
27	4194401	4196400	2000	DUP	PUDP;NLGN4X	intergenic
27	4220001	4222000	2000	DUP	PUDP;NLGN4X	intergenic
27	4370001	4371600	1600	DUP	PUDP;NLGN4X	intergenic
27	44627201	44628800	1600	DUP	MTMR8	intron
27	448801	450400	1600	DUP	LOC105605310;CRLF2	intergenic
27	4510001	4511600	1600	DUP	PUDP	intron
27	4529201	4530800	1600	DUP	STS	exon
27	4539601	4541600	2000	DUP	STS	intron
27	4552401	4556000	3600	DUP	STS	intron
27	4573601	4575200	1600	DUP	STS	intron
27	45966001	45967600	1600	DUP	LOC105605676	exon
27	4601201	4603200	2000	DUP	STS	intron
27	4612401	4614000	1600	DUP	STS	intron
27	466801	469200	2400	DUP	LOC105605310;CRLF2	intergenic
27	4693201	4694800	1600	DUP	LOC105605334;STS	intergenic
27	470001	472000	2000	DUP	LOC105605310;CRLF2	intergenic
27	4704401	4708000	3600	DUP	LOC105605334;STS	intergenic
27	4726401	4728400	2000	DUP	LOC105605334;STS	intergenic
27	47430801	47432400	1600	DUP	RRAGB	intron
27	4847601	4849600	2000	DUP	LOC105605334;STS	intergenic
27	4890401	4892400	2000	DUP	LOC105605334;STS	intergenic
27	48984001	48985600	1600	DUP	TRNAS-GGA;PHF8	intergenic
27	4929601	4931600	2000	DUP	LOC105605334;STS	intergenic
27	4932001	4933600	1600	DUP	LOC105605334;STS	intergenic
27	5010001	5011600	1600	DUP	TRNAC-GCA;PNPLA4	intergenic
27	5022801	5024400	1600	DUP	TRNAC-GCA;PNPLA4	intergenic
27	5104801	5106800	2000	DUP	TRNAC-GCA;PNPLA4	intergenic
27	5118001	5121200	3200	DUP	TRNAC-GCA;PNPLA4	intergenic
27	5144401	5146000	1600	DUP	TRNAC-GCA;PNPLA4	intergenic
27	5241201	5242800	1600	DUP	PNPLA4	intron
27	524401	526400	2000	DUP	LOC101115509	intron
27	5250401	5252000	1600	DUP	LOC105605336	intron
27	5276001	5278400	2400	DUP	LOC105605336	intron
27	5294001	5296800	2800	DUP	LOC105605336	intron
27	5303601	5305600	2000	DUP	LOC105605336	intron
27	53372001	53373600	1600	DUP	LOC101114591;ZNF81	intergenic
27	53441601	53443200	1600	DUP	LOC105605480	intron
27	5357201	5359200	2000	DUP	LOC105605336	intron
27	53641601	53643200	1600	DEL	LOC101116124;LOC101116635	intergenic
27	5416001	5418400	2400	DUP	LOC105605336	intron
27	5435601	5437600	2000	DUP	LOC105605336	intron
27	5447201	5449200	2000	DUP	LOC105605336	intron
27	54559601	54561200	1600	DUP	SLC9A7;RP2	intergenic
27	5461601	5464800	3200	DUP	LOC105605336	intron
27	5492001	5493600	1600	DUP	LOC105605336	intron
27	55357201	55358800	1600	DUP	LOC101119962;EDA2R	intergenic
27	5544801	5547200	2400	DUP	LOC105605336	intron
27	5570801	5572400	1600	DUP	LOC105605336	intron
27	5591601	5593200	1600	DUP	LOC106991979;LOC105605336	intergenic
27	5611601	5613600	2000	DUP	LOC106991979;LOC105605336	intergenic
27	5616801	5618400	1600	DUP	LOC106991979;LOC105605336	intergenic
27	56515201	56517200	2000	DUP	LOC101119962;AR	intergenic
27	5687601	5690400	2800	DUP	LOC106991979;LOC105605335	intergenic
27	571601	573600	2000	DUP	LOC105605313	intron
27	5724401	5726000	1600	DUP	LOC105605335	exon
27	5740401	5742400	2000	DUP	ANOS1	intron
27	582401	584800	2400	DUP	IL3RA;LOC105605313	intergenic
27	584801	586400	1600	DUP	IL3RA;LOC105605313	intergenic
27	595201	597600	2400	DUP	IL3RA	exon
27	5953601	5956400	2800	DUP	LOC105605337;ANOS1	intergenic
27	5957201	5958800	1600	DUP	LOC105605337;ANOS1	intergenic
27	6005201	6008400	3200	DUP	LOC105605337;ANOS1	intergenic
27	6028401	6030400	2000	DUP	LOC105605337;ANOS1	intergenic
27	61201	62800	1600	DUP	LOC105605310	intergenic
27	6144001	6146400	2400	DUP	LOC105605337;ANOS1	intergenic
27	6148401	6150000	1600	DUP	LOC105605337;ANOS1	intergenic
27	6241601	6244400	2800	DUP	LOC105605337;ANOS1	intergenic
27	6358801	6361200	2400	DUP	LOC105605337;ANOS1	intergenic
27	6408401	6410400	2000	DUP	LOC105605337;ANOS1	intergenic
27	6430401	6432400	2000	DUP	LOC105605337;ANOS1	intergenic
27	6441601	6444000	2400	DUP	LOC105605337;ANOS1	intergenic
27	6468401	6470400	2000	DUP	LOC105605337;ANOS1	intergenic
27	64710801	64712400	1600	DUP	ATRX	intron
27	6494801	6496400	1600	DUP	LOC105605337	intron
27	6522801	6524400	1600	DUP	LOC105605337;TBL1X	intergenic
27	6576001	6578400	2400	DUP	LOC105605337;TBL1X	intergenic
27	6752801	6754400	1600	DUP	TBL1X	intron
27	67807601	67812000	4400	DEL	FAM46D;BRWD3	intergenic
27	6805601	6807600	2000	DUP	TBL1X	intron
27	6808801	6810800	2000	DUP	TBL1X	intron
27	68391601	68393600	2000	DUP	SH3BGRL;LOC105605689	intergenic
27	6954401	6958000	3600	DUP	GPR143;SHROOM2	intergenic
27	6990401	6993200	2800	DUP	SHROOM2	intron
27	706401	708000	1600	DUP	P2RY8;AKAP17A	intergenic
27	71387601	71389200	1600	DUP	HDX;RPS6KA6	intergenic
27	71642001	71644400	2400	DUP	HDX	intron
27	72137201	72139200	2000	DUP	LOC105605519	intron
27	72895601	72897200	1600	DUP	APOOL;ZNF711	intergenic
27	76488401	76490000	1600	DUP	LOC101106825;LOC105605697	intergenic
27	8411201	8412800	1600	DUP	LOC106990249;LOC105605347	intergenic
27	905201	907600	2400	DUP	LOC106990378	intron
27	912801	914400	1600	DUP	LOC106990378	intron
27	92215201	92217200	2000	DUP	LOC101102539;ZIC3	intergenic
27	92225201	92227200	2000	DUP	LOC101102539;ZIC3	intergenic
27	93128001	93129600	1600	DUP	RBMX;ARHGEF6	intergenic
27	98080401	98082000	1600	DUP	LOC101120813;LOC105605585	intergenic
27	998401	1000400	2000	DUP	DHRSX	intron
3	106910801	106912800	2000	DEL	TSPAN8;ZC3H6	intergenic
3	11689601	11691200	1600	DUP	LHX2;DENND1A	intergenic
3	119214001	119216000	2000	DUP	LOC101104054	intron
3	129288801	129291200	2400	DUP	LOC105614717;LOC105614718	intergenic
3	134642401	134644000	1600	DUP	DAZAP2	exon
3	183650801	183653600	2800	DEL	LOC105613668;IPO8	intergenic
3	197912801	197914400	1600	DUP	LMO3	exon
3	203433201	203435600	2400	DEL	LOC101122269;LOC106991007	intergenic
3	203932001	203933600	1600	DUP	LOC105613001	intron
3	205389601	205392400	2800	DUP	LOC101104740;LOC101122940	intergenic
3	205392801	205394800	2000	DUP	LOC101104740;LOC101122940	intergenic
3	206448801	206450800	2000	DUP	LOC105608615	intron
3	206834401	206836400	2000	DUP	LOC105614851	exon
3	206846001	206848000	2000	DUP	LOC105614851	intron
3	206857201	206860000	2800	DUP	LOC100191064	intron
3	3554001	3555600	1600	DEL	PAEP	intron
3	3555601	3557600	2000	DUP	PAEP	intron
3	38798801	38800400	1600	DUP	GFPT1	exon
3	70598801	70600800	2000	DEL	LOC101112474;NRXN1	intergenic
3	82450801	82452800	2000	DUP	TRNAG-UCC;RPL10	intergenic
4	10348001	10350000	2000	DUP	LOC101112306	intron
4	108303601	108305600	2000	DUP	TRNAS-GGA;LOC105615127	intergenic
4	112300401	112302800	2400	DEL	LOC101110230;LOC101122778	intergenic
4	112316001	112318000	2000	DEL	LOC101110230	exon
4	15501201	15502800	1600	DEL	MIOS;COL28A1	intergenic
4	2371201	2373200	2000	DEL	LOC101106517;LOC105614180	intergenic
4	46891601	46894000	2400	DUP	ATXN7L1	intron
4	82997601	83003200	5600	DEL	TRNAS-GGA;ANKRD7	intergenic
5	37918801	37920400	1600	DUP	LOC105614551	intron
5	38623601	38625200	1600	DEL	LOC101115539;LOC101115794	intergenic
5	71185601	71187200	1600	DEL	TRNAS-GGA;GABRG2	intergenic
6	115468801	115470400	1600	DUP	RNF4	exon
6	51396401	51399200	2800	DEL	TRNAC-GCA;PCDH7	intergenic
6	73995201	73996800	1600	DEL	TRNAC-GCA;ADGRL3	intergenic
6	74342801	74344800	2000	DEL	TRNAC-GCA;ADGRL3	intergenic
6	80087201	80088800	1600	DUP	TECRL;EPHA5	intergenic
6	9682801	9684400	1600	DEL	LOC105612939;LOC105613665	intergenic
7	125601	127200	1600	DEL	TRNAK-UUU	intergenic
7	22427601	22431600	4000	DUP	-	-
7	22432801	22435600	2800	DUP	-	-
7	22436001	22438400	2400	DUP	-	-
7	22721601	22723200	1600	DUP	LOC101113153;LOC101113415	intergenic
7	22770401	22772000	1600	DUP	LOC101106775;LOC101113680	intergenic
7	53902801	53907600	4800	DEL	TRNAW-CCA;TRNAC-GCA	intergenic
8	13404401	13406000	1600	DEL	TRNAC-ACA;NKAIN2	intergenic
8	2211201	2215200	4000	DUP	FILIP1	intron
8	2218801	2228000	9200	DUP	FILIP1	exon
8	2236801	2242000	5200	DUP	FILIP1	intron
8	2243201	2247200	4000	DUP	FILIP1	intron
8	2248801	2250800	2000	DUP	FILIP1	intron
8	2252001	2256400	4400	DUP	FILIP1	intron
8	2269201	2271200	2000	DUP	FILIP1	intron
8	2272401	2274000	1600	DUP	FILIP1	intron
8	2274401	2276400	2000	DUP	FILIP1	intron
8	2278401	2283600	5200	DUP	FILIP1	intron
8	70453201	70456000	2800	DEL	GRM1	intron
9	13065601	13067600	2000	DUP	LOC105612928	intron
9	18953601	18955600	2000	DUP	LOC106991337;LOC105611114	intergenic
9	74119601	74122000	2400	DUP	AZIN1	exon
9	81601	83600	2000	DUP	LOC105615961;LOC105613741	intergenic
9	8354001	8356400	2400	DEL	TRNAS-GGA;ADGRB3	intergenic
9	89610401	89613200	2800	DUP	CA3;LOC101113601	intergenic
9	89649601	89652800	3200	DUP	LOC101113601;LOC101113860	intergenic

## Sheet: VTS and OTS shared
Table S3.Detailed information of the detected CNVRs.
chr	start	end	chr: start-end	Length	Type	Gene name	Gene type
1	110238401	110240400	1:110238401-110240400	2000	DUP	ITLN;CD244	intergenic
1	110276801	110278400	1:110276801-110278400	1600	DUP	ITLN;CD244	intergenic
1	137110401	137115600	1:137110401-137115600	5200	DEL	CHODL;C1H21orf91	intergenic
1	149345601	149349200	1:149345601-149349200	3600	DEL	TRNAS-GGA;GBE1	intergenic
1	150514401	150520000	1:150514401-150520000	5600	DEL	TRNAS-GGA;CADM2	intergenic
1	150532801	150536800	1:150532801-150536800	4000	DEL	TRNAS-GGA;CADM2	intergenic
1	150538801	150546800	1:150538801-150546800	8000	DEL	TRNAS-GGA;CADM2	intergenic
1	158130401	158132400	1:158130401-158132400	2000	DEL	NSUN3;EPHA6	intergenic
1	230716001	230718000	1:230716001-230718000	2000	DEL	TRNAR-UCU;MME	intergenic
1	241304401	241306400	1:241304401-241306400	2000	DUP	TRNAS-GGA;PLOD2	intergenic
1	24366001	24368000	1:24366001-24368000	2000	DUP	ELAVL4	intron
1	264846001	264848400	1:264846001-264848400	2400	DUP	RUNX1	intron
1	34488401	34490000	1:34488401-34490000	1600	DEL	LOC101121820;LOC101104943	intergenic
1	6230401	6232000	1:6230401-6232000	1600	DEL	LOC105616167;LOC105610605	intergenic
1	8289601	8291200	1:8289601-8291200	1600	DUP	CSMD2	intron
1	98479601	98482400	1:98479601-98482400	2800	DUP	TRNAG-CCC;TRNAV-AAC	intergenic
10	132801	136000	10:132801-136000	3200	DUP	LOC101118284;PCDH20	intergenic
10	1842801	1844800	10:1842801-1844800	2000	DUP	TDRD3	intron
10	20278401	20280400	10:20278401-20280400	2000	DEL	LOC105608015;LOC105608016	intergenic
10	4898801	4901200	10:4898801-4901200	2400	DEL	LOC105612615;LOC105616123	intergenic
10	538401	540000	10:538401-540000	1600	DEL	LOC101118284;PCDH20	intergenic
10	70314401	70316000	10:70314401-70316000	1600	DEL	LOC101106781	intron
10	70400401	70402400	10:70400401-70402400	2000	DEL	LOC101106781	intron
10	70768801	70770400	10:70768801-70770400	1600	DUP	LOC106991387;LOC106991366	intergenic
10	70870001	70871600	10:70870001-70871600	1600	DUP	LOC105616215;LOC105601928	intergenic
10	71047201	71049200	10:71047201-71049200	2000	DUP	LOC105613864	intron
10	71252401	71254400	10:71252401-71254400	2000	DUP	LOC105601928;LOC105614203	intergenic
10	71264401	71266400	10:71264401-71266400	2000	DUP	LOC105601928;LOC105614203	intergenic
10	71283601	71289600	10:71283601-71289600	6000	DUP	LOC105601928;LOC105614203	intergenic
10	71291601	71295200	10:71291601-71295200	3600	DUP	LOC105614203	exon
10	71564401	71566000	10:71564401-71566000	1600	DUP	LOC105616212;LOC101108321	intergenic
10	71697201	71699600	10:71697201-71699600	2400	DEL	LOC101109105	intron
10	71708801	71712400	10:71708801-71712400	3600	DEL	LOC101109105	intron
10	71716401	71718000	10:71716401-71718000	1600	DUP	LOC101109105	intron
10	71792801	71795200	10:71792801-71795200	2400	DUP	LOC101109370	intron
10	71984801	71988800	10:71984801-71988800	4000	DEL	LOC101109626	intron
10	72008401	72010400	10:72008401-72010400	2000	DEL	LOC101109626	intron
10	72111601	72114000	10:72111601-72114000	2400	DUP	LOC101109890	intron
11	2019601	2022400	11:2019601-2022400	2800	DEL	KIF2B;CA10	intergenic
11	49657201	49660400	11:49657201-49660400	3200	DUP	LOC101110855	intron
12	10542401	10544000	12:10542401-10544000	1600	DEL	LOC105611804	intron
12	158801	160800	12:158801-160800	2000	DEL	PPFIA4	intron
12	45191201	45192800	12:45191201-45192800	1600	DUP	CHD5	intron
12	4935201	4936800	12:4935201-4936800	1600	DUP	CFH	intron
12	4956801	4958400	12:4956801-4958400	1600	DUP	CFH	intron
12	8766801	8768400	12:8766801-8768400	1600	DEL	TRNAK-UUU;TRNAC-GCA	intergenic
13	1160001	1163600	13:1160001-1163600	3600	DEL	PLCB1	intron
13	16501201	16503200	13:16501201-16503200	2000	DUP	CCDC3;LOC101109728	intergenic
13	2706001	2707600	13:2706001-2707600	1600	DEL	ANKEF1;PAK7	intergenic
13	63260401	63262400	13:63260401-63262400	2000	DEL	ITCH	intron
13	73167201	73168800	13:73167201-73168800	1600	DEL	LOC105610219;LOC443097	intergenic
14	44360801	44362800	14:44360801-44362800	2000	DEL	LOC105616873;LOC105607568	intergenic
14	44597201	44600000	14:44597201-44600000	2800	DEL	LOC105607571;LOC105607569	intergenic
14	46507201	46509200	14:46507201-46509200	2000	DUP	LOC101103173	intron
14	49358401	49360400	14:49358401-49360400	2000	DUP	LOC105614537;LOC101122718	intergenic
14	49376001	49378400	14:49376001-49378400	2400	DUP	LOC105614537;LOC101122718	intergenic
14	49388001	49389600	14:49388001-49389600	1600	DUP	-	-
14	49710401	49712000	14:49710401-49712000	1600	DUP	LOC105616889;LOC101122545	intergenic
14	56893201	56895200	14:56893201-56895200	2000	DUP	LOC101105099;LOC101104852	intergenic
14	57177201	57178800	14:57177201-57178800	1600	DUP	LOC101107626	exon
14	59661201	59666000	14:59661201-59666000	4800	DUP	LOC101123656	intron
14	59667601	59670400	14:59667601-59670400	2800	DUP	LOC101123656	intron
14	59671201	59676000	14:59671201-59676000	4800	DUP	LOC101123656	intron
14	59778001	59780000	14:59778001-59780000	2000	DUP	LOC101103752	intron
14	7900401	7902400	14:7900401-7902400	2000	DEL	SDR42E1	intron
15	18384801	18387600	15:18384801-18387600	2800	DEL	C15H11orf87;DDX10	intergenic
15	3023201	3025200	15:3023201-3025200	2000	DUP	LOC101117272;PDGFD	intergenic
15	47155601	47158400	15:47155601-47158400	2800	DEL	LOC101121967;LOC101121708	intergenic
15	69222001	69224400	15:69222001-69224400	2400	DEL	-	-
15	76513601	76515600	15:76513601-76515600	2000	DUP	LOC101102009	exon
15	77159201	77161200	15:77159201-77161200	2000	DUP	LOC106990733	intron
16	3522801	3524800	16:3522801-3524800	2000	DUP	FGF18;FBXW11	intergenic
16	53998401	54000800	16:53998401-54000800	2400	DEL	TRNAS-GCU;LOC105602609	intergenic
17	27372001	27374000	17:27372001-27374000	2000	DEL	TRNAS-GGA;LOC105602775	intergenic
17	38042401	38045600	17:38042401-38045600	3200	DEL	LOC101111319;FSTL5	intergenic
17	5896401	5899200	17:5896401-5899200	2800	DUP	GATB	intron
17	65721601	65723200	17:65721601-65723200	1600	DUP	SEZ6L	intron
19	52695201	52696800	19:52695201-52696800	1600	DUP	LOC101102765	intron
19	53101601	53103200	19:53101601-53103200	1600	DUP	CCR3;LOC101103766	intergenic
2	111785601	111788400	2:111785601-111788400	2800	DUP	LOC101123441;LGSN	intergenic
2	167453201	167455200	2:167453201-167455200	2000	DUP	LRP1B	intron
2	174615601	174617600	2:174615601-174617600	2000	DEL	RAB3GAP1	intron
2	175281601	175283200	2:175281601-175283200	1600	DEL	MGAT5	intron
2	190723601	190725200	2:190723601-190725200	1600	DUP	TRNAW-CCA;LOC105609998	intergenic
2	197748001	197750000	2:197748001-197750000	2000	DUP	HECW2	intron
2	200321601	200323600	2:200321601-200323600	2000	DEL	LOC106990596;SATB2	intergenic
2	21524401	21526800	2:21524401-21526800	2400	DUP	TMEM246;RNF20	intergenic
2	26972801	26974400	2:26972801-26974400	1600	DUP	SPTLC1	intron
2	33276401	33281200	2:33276401-33281200	4800	DUP	GAS1;ZCCHC6	intergenic
2	78603201	78605600	2:78603201-78605600	2400	DEL	TRNAC-GCA;PTPRD	intergenic
2	89265601	89267600	2:89265601-89267600	2000	DUP	TP-1;IFNE	intergenic
2	93523201	93524800	2:93523201-93524800	1600	DEL	TUSC1;LOC105608404	intergenic
20	16762401	16765600	20:16762401-16765600	3200	DUP	PTK7;SRF	intergenic
20	25640801	25644000	20:25640801-25644000	3200	DEL	DQA;LOC101120871	intergenic
20	25644801	25652400	20:25644801-25652400	7600	DEL	DQA;LOC101120871	intergenic
20	25790801	25793600	20:25790801-25793600	2800	DEL	LOC105603751;LOC101110277	intergenic
20	27513201	27515200	20:27513201-27515200	2000	DUP	LOC101108432;LOC101110710	intergenic
20	27532801	27534400	20:27532801-27534400	1600	DEL	LOC101108432;LOC101110710	intergenic
20	27540801	27543600	20:27540801-27543600	2800	DEL	LOC101108432;LOC101110710	intergenic
20	27582401	27584400	20:27582401-27584400	2000	DEL	LOC101110710;LOC105603777	intergenic
20	31385601	31387200	20:31385601-31387200	1600	DUP	LOC101106806	intron
21	26143601	26146400	21:26143601-26146400	2800	DEL	LOC101104617;LOC101104871	intergenic
21	26148401	26150400	21:26148401-26150400	2000	DEL	LOC101104617;LOC101104871	intergenic
21	26152001	26156000	21:26152001-26156000	4000	DEL	LOC101104871;LOC101101934	intergenic
21	26760401	26762000	21:26760401-26762000	1600	DEL	LOC101104189;LOC101113113	intergenic
21	26767601	26769600	21:26767601-26769600	2000	DUP	LOC101113113;LOC101113374	intergenic
21	37538001	37541200	21:37538001-37541200	3200	DUP	LOC105604082	exon
21	4906801	4910400	21:4906801-4910400	3600	DEL	LOC101109839;LOC101110373	intergenic
21	6670401	6672000	21:6670401-6672000	1600	DUP	CTSC;GRM5	intergenic
22	1204001	1205600	22:1204001-1205600	1600	DEL	LOC105604204;ZWINT	intergenic
22	1206401	1208000	22:1206401-1208000	1600	DEL	LOC105604204;ZWINT	intergenic
22	13671201	13673600	22:13671201-13673600	2400	DUP	KIF11;IDE	intergenic
25	1680801	1683200	25:1680801-1683200	2400	DUP	PGBD5;GALNT2	intergenic
25	27019201	27020800	25:27019201-27020800	1600	DEL	PCBD1;UNC5B	intergenic
25	2842401	2844400	25:2842401-2844400	2000	DUP	LOC105613978;LOC105604893	intergenic
25	35058801	35061600	25:35058801-35061600	2800	DUP	PLAC9;SFTPD	intergenic
25	35132001	35134000	25:35132001-35134000	2000	DUP	SFTPD	intron
25	35135201	35137600	25:35135201-35137600	2400	DUP	SFTPD	intron
25	41522001	41523600	25:41522001-41523600	1600	DUP	LOC105605049	exon
26	31688801	31691600	26:31688801-31691600	2800	DEL	PROSC;ADGRA2	intergenic
26	43670801	43673600	26:43670801-43673600	2800	DEL	LOC105605292	intergenic
26	4726001	4731200	26:4726001-4731200	5200	DUP	LOC105605296;LOC105605113	intergenic
27	1031201	1032800	27:1031201-1032800	1600	DUP	DHRSX	intron
27	103320401	103322000	27:103320401-103322000	1600	DUP	TENM1	intron
27	105572001	105574000	27:105572001-105574000	2000	DUP	PRR32;LOC101118761	intergenic
27	106348001	106350800	27:106348001-106350800	2800	DUP	LOC101119281;LOC106990690	intergenic
27	108001	109600	27:108001-109600	1600	DUP	LOC105605310	intergenic
27	108305201	108306800	27:108305201-108306800	1600	DUP	SLC25A14	intron
27	109494001	109496000	27:109494001-109496000	2000	DUP	KIAA1210	intron
27	112191601	112193200	27:112191601-112193200	1600	DUP	TRNAS-GGA;CT83	intergenic
27	113337201	113338800	27:113337201-113338800	1600	DUP	KLHL4;IL13RA2	intergenic
27	114578401	114580000	27:114578401-114580000	1600	DUP	LOC101108550;AMOT	intergenic
27	114916001	114917600	27:114916001-114917600	1600	DUP	LOC101108550;AMOT	intergenic
27	1188001	1190400	27:1188001-1190400	2400	DUP	CD99	intron
27	1200001	1201600	27:1200001-1201600	1600	DUP	CD99	intron
27	12001	13600	27:12001-13600	1600	DUP	LOC105605310	intergenic
27	1244801	1247200	27:1244801-1247200	2400	DUP	XG	intron
27	127263601	127265600	27:127263601-127265600	2000	DUP	LOC101102461;TRNAE-CUC	intergenic
27	131172401	131174000	27:131172401-131174000	1600	DUP	LOC101103955;PCDH11X	intergenic
27	131518401	131520000	27:131518401-131520000	1600	DUP	LOC101103955;PCDH11X	intergenic
27	1320401	1322000	27:1320401-1322000	1600	DUP	ARSE	intron
27	132945601	132949600	27:132945601-132949600	4000	DEL	LOC101103955;PCDH11X	intergenic
27	132966001	132968000	27:132966001-132968000	2000	DEL	LOC101103955;PCDH11X	intergenic
27	134964401	134966000	27:134964401-134966000	1600	DEL	PABPC5	intergenic
27	1368801	1370800	27:1368801-1370800	2000	DUP	LOC101116287;LOC105605318	intergenic
27	1426801	1429200	27:1426801-1429200	2400	DUP	LOC105605318;MXRA5	intergenic
27	14537201	14538800	27:14537201-14538800	1600	DUP	REPS2	intron
27	1526401	1528400	27:1526401-1528400	2000	DEL	LOC105605319;LOC105605321	intergenic
27	1553201	1554800	27:1553201-1554800	1600	DUP	LOC105605321	intron
27	156401	158000	27:156401-158000	1600	DUP	LOC105605310	intergenic
27	159201	161600	27:159201-161600	2400	DUP	LOC105605310	intergenic
27	1639601	1641200	27:1639601-1641200	1600	DUP	LOC105605323;PRKX	intergenic
27	1688001	1690400	27:1688001-1690400	2400	DUP	LOC105605323;PRKX	intergenic
27	1756401	1758000	27:1756401-1758000	1600	DUP	LOC105605323;PRKX	intergenic
27	1775601	1777600	27:1775601-1777600	2000	DUP	LOC105605323;PRKX	intergenic
27	17948401	17950400	27:17948401-17950400	2000	DUP	LOC101105635;RPS6KA3	intergenic
27	1827201	1829200	27:1827201-1829200	2000	DUP	LOC105605323;PRKX	intergenic
27	1840001	1841600	27:1840001-1841600	1600	DUP	LOC105605323;PRKX	intergenic
27	1938001	1940000	27:1938001-1940000	2000	DUP	LOC105605323;LOC105605322	intergenic
27	197201	199200	27:197201-199200	2000	DUP	LOC105605310	intergenic
27	2031201	2032800	27:2031201-2032800	1600	DUP	LOC101117055;LOC105605322	intergenic
27	204001	206400	27:204001-206400	2400	DUP	LOC105605310	intergenic
27	2064001	2065600	27:2064001-2065600	1600	DUP	LOC101117055;LOC105605322	intergenic
27	2168001	2170400	27:2168001-2170400	2400	DUP	LOC101117055;LOC101116018	intergenic
27	2229601	2232000	27:2229601-2232000	2400	DUP	LOC101117055;LOC101116018	intergenic
27	2413601	2415600	27:2413601-2415600	2000	DUP	LOC101117055;LOC101116018	intergenic
27	24232401	24234800	27:24232401-24234800	2400	DUP	TRNAC-ACA;LOC105605406	intergenic
27	2439601	2441200	27:2439601-2441200	1600	DUP	LOC101117055;LOC101116018	intergenic
27	25058801	25060800	27:25058801-25060800	2000	DUP	LOC101116885;LOC101111863	intergenic
27	2508001	2509600	27:2508001-2509600	1600	DUP	LOC101116018	intron
27	2565601	2567200	27:2565601-2567200	1600	DUP	LOC105605670;LOC101116018	intergenic
27	2578401	2580400	27:2578401-2580400	2000	DUP	LOC105605670;LOC101116018	intergenic
27	258401	260000	27:258401-260000	1600	DUP	LOC105605310	intergenic
27	2597601	2599600	27:2597601-2599600	2000	DUP	LOC105605670	intron
27	2605201	2608400	27:2605201-2608400	3200	DUP	LOC101116281;LOC105605670	intergenic
27	2675201	2678400	27:2675201-2678400	3200	DUP	LOC101116281;LOC105605670	intergenic
27	2683601	2685200	27:2683601-2685200	1600	DUP	LOC101116281;LOC105605670	intergenic
27	2744401	2746000	27:2744401-2746000	1600	DUP	LOC101116281;LOC105605670	intergenic
27	2813601	2816000	27:2813601-2816000	2400	DUP	LOC101116281;LOC105605670	intergenic
27	2849601	2851200	27:2849601-2851200	1600	DUP	LOC101116281;LOC101116537	intergenic
27	2928401	2931200	27:2928401-2931200	2800	DUP	LOC101116537;LOC101116799	intergenic
27	2976801	2978800	27:2976801-2978800	2000	DUP	LOC101116799;LOC106991978	intergenic
27	2985601	2987600	27:2985601-2987600	2000	DUP	LOC101116799;LOC106991978	intergenic
27	3034401	3036000	27:3034401-3036000	1600	DUP	LOC101116799;LOC106991978	intergenic
27	3036401	3038400	27:3036401-3038400	2000	DUP	LOC101116799;LOC106991978	intergenic
27	3098001	3099600	27:3098001-3099600	1600	DUP	LOC101116799;LOC106991978	intergenic
27	311201	312800	27:311201-312800	1600	DUP	LOC105605310	intergenic
27	3122001	3124400	27:3122001-3124400	2400	DUP	LOC101116799;LOC106991978	intergenic
27	32822401	32824000	27:32822401-32824000	1600	DUP	TRNAS-GGA;LOC105605423	intergenic
27	3340801	3344000	27:3340801-3344000	3200	DUP	LOC101116799;LOC106991978	intergenic
27	3434401	3436400	27:3434401-3436400	2000	DUP	NLGN4X	exon
27	34384001	34386800	27:34384001-34386800	2800	DUP	LOC105605424;PRRG1	intergenic
27	3439601	3441200	27:3439601-3441200	1600	DUP	NLGN4X	intron
27	3489601	3492000	27:3489601-3492000	2400	DUP	NLGN4X	intron
27	3688801	3690400	27:3688801-3690400	1600	DUP	NLGN4X	intron
27	3706401	3708400	27:3706401-3708400	2000	DUP	NLGN4X	intron
27	373601	375600	27:373601-375600	2000	DUP	LOC105605310	intergenic
27	3746801	3748400	27:3746801-3748400	1600	DUP	NLGN4X	intron
27	3802801	3804400	27:3802801-3804400	1600	DUP	NLGN4X	intron
27	3804801	3806800	27:3804801-3806800	2000	DUP	NLGN4X	intron
27	3881201	3883200	27:3881201-3883200	2000	DUP	PUDP;NLGN4X	intergenic
27	39115601	39117200	27:39115601-39117200	1600	DUP	LOC101105633;CASK	intergenic
27	40132001	40134000	27:40132001-40134000	2000	DUP	LOC101105633;LOC101105884	intergenic
27	4064801	4066400	27:4064801-4066400	1600	DUP	PUDP;NLGN4X	intergenic
27	4115601	4118000	27:4115601-4118000	2400	DUP	PUDP;NLGN4X	intergenic
27	4118001	4122000	27:4118001-4122000	4000	DUP	PUDP;NLGN4X	intergenic
27	4166801	4168400	27:4166801-4168400	1600	DUP	PUDP;NLGN4X	intergenic
27	4199601	4202000	27:4199601-4202000	2400	DUP	PUDP;NLGN4X	intergenic
27	4206401	4208800	27:4206401-4208800	2400	DUP	PUDP;NLGN4X	intergenic
27	422001	424400	27:422001-424400	2400	DUP	LOC105605310	intergenic
27	4243201	4247200	27:4243201-4247200	4000	DUP	PUDP;NLGN4X	intergenic
27	424801	426800	27:424801-426800	2000	DUP	LOC105605310	intergenic
27	4279201	4281600	27:4279201-4281600	2400	DUP	PUDP;NLGN4X	intergenic
27	4326801	4328800	27:4326801-4328800	2000	DUP	PUDP;NLGN4X	intergenic
27	43380401	43382400	27:43380401-43382400	2000	DUP	LOC101108987	intron
27	44100801	44102400	27:44100801-44102400	1600	DUP	ARHGEF9	intron
27	442001	443600	27:442001-443600	1600	DUP	LOC105605310;CRLF2	intergenic
27	4462001	4463600	27:4462001-4463600	1600	DUP	PUDP;NLGN4X	intergenic
27	46886401	46888000	27:46886401-46888000	1600	DUP	LOC105605452;UBQLN2	intergenic
27	4755201	4757200	27:4755201-4757200	2000	DUP	LOC105605334;STS	intergenic
27	4796401	4799200	27:4796401-4799200	2800	DUP	LOC105605334;STS	intergenic
27	4810001	4814800	27:4810001-4814800	4800	DUP	LOC105605334;STS	intergenic
27	4857601	4860800	27:4857601-4860800	3200	DUP	LOC105605334;STS	intergenic
27	4910401	4912400	27:4910401-4912400	2000	DUP	LOC105605334;STS	intergenic
27	4973201	4976400	27:4973201-4976400	3200	DUP	LOC105605334;STS	intergenic
27	4979201	4983600	27:4979201-4983600	4400	DUP	LOC105605334;TRNAC-GCA	intergenic
27	5026801	5029200	27:5026801-5029200	2400	DUP	TRNAC-GCA;PNPLA4	intergenic
27	5064801	5067600	27:5064801-5067600	2800	DUP	TRNAC-GCA;PNPLA4	intergenic
27	5167601	5171600	27:5167601-5171600	4000	DUP	TRNAC-GCA;PNPLA4	intergenic
27	51930801	51932400	27:51930801-51932400	1600	DUP	CCNB3	intron
27	5198801	5200400	27:5198801-5200400	1600	DUP	TRNAC-GCA;PNPLA4	intergenic
27	5201	6800	27:5201-6800	1600	DUP	LOC105605310	intergenic
27	5286001	5287600	27:5286001-5287600	1600	DUP	LOC105605336	intron
27	5297201	5298800	27:5297201-5298800	1600	DUP	LOC105605336	intron
27	5318801	5320800	27:5318801-5320800	2000	DUP	LOC105605336	intron
27	5332401	5334800	27:5332401-5334800	2400	DUP	LOC105605336	intron
27	5335601	5337200	27:5335601-5337200	1600	DUP	LOC105605336	intron
27	5342001	5344800	27:5342001-5344800	2800	DUP	LOC105605336	intron
27	53557201	53558800	27:53557201-53558800	1600	DUP	LOC101115603;SPACA5	intergenic
27	5400401	5402400	27:5400401-5402400	2000	DUP	LOC105605336	intron
27	54104001	54106000	27:54104001-54106000	2000	DEL	LOC101117398;ZNF157	intergenic
27	5423601	5425600	27:5423601-5425600	2000	DUP	LOC105605336	intron
27	5451601	5453200	27:5451601-5453200	1600	DUP	LOC105605336	intron
27	550001	551600	27:550001-551600	1600	DUP	LOC105605313;LOC101115509	intergenic
27	5524001	5525600	27:5524001-5525600	1600	DUP	LOC105605336	intron
27	5528001	5530000	27:5528001-5530000	2000	DUP	LOC105605336	intron
27	5642001	5644000	27:5642001-5644000	2000	DUP	LOC106991979;LOC105605336	intergenic
27	5661201	5662800	27:5661201-5662800	1600	DUP	LOC106991979;LOC105605335	intergenic
27	566801	568400	27:566801-568400	1600	DUP	LOC105605313	intron
27	5730001	5732400	27:5730001-5732400	2400	DUP	ANOS1	intron
27	5775201	5776800	27:5775201-5776800	1600	DUP	ANOS1	intron
27	5814801	5816400	27:5814801-5816400	1600	DUP	ANOS1	intron
27	5875201	5877600	27:5875201-5877600	2400	DUP	ANOS1	intron
27	5914401	5916000	27:5914401-5916000	1600	DUP	LOC105605337;ANOS1	intergenic
27	5945201	5947200	27:5945201-5947200	2000	DUP	LOC105605337;ANOS1	intergenic
27	5965601	5967200	27:5965601-5967200	1600	DUP	LOC105605337;ANOS1	intergenic
27	6000401	6002800	27:6000401-6002800	2400	DUP	LOC105605337;ANOS1	intergenic
27	6069201	6071200	27:6069201-6071200	2000	DUP	LOC105605337;ANOS1	intergenic
27	6082401	6084400	27:6082401-6084400	2000	DUP	LOC105605337;ANOS1	intergenic
27	60860001	60861600	27:60860001-60861600	1600	DUP	CXCR3;LOC101107932	intergenic
27	6138401	6140000	27:6138401-6140000	1600	DUP	LOC105605337;ANOS1	intergenic
27	61900001	61902000	27:61900001-61902000	2000	DUP	PHKA1	intron
27	6196801	6198400	27:6196801-6198400	1600	DUP	LOC105605337;ANOS1	intergenic
27	6224001	6225600	27:6224001-6225600	1600	DUP	LOC105605337;ANOS1	intergenic
27	6228401	6230000	27:6228401-6230000	1600	DUP	LOC105605337;ANOS1	intergenic
27	6282801	6284800	27:6282801-6284800	2000	DUP	LOC105605337;ANOS1	intergenic
27	6287601	6289200	27:6287601-6289200	1600	DUP	LOC105605337;ANOS1	intergenic
27	6336801	6338800	27:6336801-6338800	2000	DUP	LOC105605337;ANOS1	intergenic
27	63398001	63400000	27:63398001-63400000	2000	DUP	KIAA2022	intron
27	6361601	6363200	27:6361601-6363200	1600	DUP	LOC105605337;ANOS1	intergenic
27	6411601	6413200	27:6411601-6413200	1600	DUP	LOC105605337;ANOS1	intergenic
27	647601	649200	27:647601-649200	1600	DUP	P2RY8	intron
27	6483601	6486000	27:6483601-6486000	2400	DUP	LOC105605337	intron
27	6512401	6514000	27:6512401-6514000	1600	DUP	LOC105605337;TBL1X	intergenic
27	6556801	6558400	27:6556801-6558400	1600	DUP	LOC105605337;TBL1X	intergenic
27	659201	660800	27:659201-660800	1600	DUP	P2RY8;AKAP17A	intergenic
27	6645601	6648800	27:6645601-6648800	3200	DUP	TBL1X	intron
27	6700401	6702400	27:6700401-6702400	2000	DUP	TBL1X	exon
27	6718001	6720800	27:6718001-6720800	2800	DUP	TBL1X	intron
27	672001	673600	27:672001-673600	1600	DUP	P2RY8;AKAP17A	intergenic
27	6760001	6762800	27:6760001-6762800	2800	DUP	TBL1X	intron
27	6831601	6833600	27:6831601-6833600	2000	DUP	TBL1X	intron
27	6874401	6876400	27:6874401-6876400	2000	DUP	GPR143	intron
27	698801	700400	27:698801-700400	1600	DUP	P2RY8;AKAP17A	intergenic
27	7030801	7033200	27:7030801-7033200	2400	DUP	SHROOM2	intron
27	726001	727600	27:726001-727600	1600	DUP	AKAP17A	exon
27	75901601	75903200	27:75901601-75903200	1600	DUP	TMLHE	intron
27	76834401	76837600	27:76834401-76837600	3200	DUP	LOC105605535;LOC101118592	intergenic
27	784001	785600	27:784001-785600	1600	DUP	ASMT;LOC106990378	intergenic
27	81277201	81279600	27:81277201-81279600	2400	DUP	TRNAE-UUC;IDS	intergenic
27	82001	83600	27:82001-83600	1600	DUP	LOC105605310	intergenic
27	82604801	82607200	27:82604801-82607200	2400	DEL	FMR1NB	intron
27	853201	854800	27:853201-854800	1600	DUP	ASMT;LOC106990378	intergenic
27	94240401	94242400	27:94240401-94242400	2000	DEL	LOC105605573;LOC101105554	intergenic
27	94248401	94250400	27:94248401-94250400	2000	DUP	LOC105605573;LOC101105554	intergenic
27	981201	982800	27:981201-982800	1600	DUP	LOC106990378;DHRSX	intergenic
3	148347601	148349200	3:148347601-148349200	1600	DEL	TRNAS-GGA;PTPRR	intergenic
3	158234001	158236400	3:158234001-158236400	2400	DUP	LOC106991000;FAM19A2	intergenic
3	164008001	164011200	3:164008001-164011200	3200	DEL	LOC101118518;LOC101112895	intergenic
3	164312001	164316000	3:164312001-164316000	4000	DEL	LOC101115450;LOC101119808	intergenic
3	186076001	186079200	3:186076001-186079200	3200	DEL	CCDC91	intron
3	203803601	203806000	3:203803601-203806000	2400	DUP	LOC101116388	intron
3	204534401	204537200	3:204534401-204537200	2800	DEL	LOC101102973	intron
3	40176801	40179200	3:40176801-40179200	2400	DUP	TRNAS-GGA;ETAA1	intergenic
3	40181601	40183200	3:40181601-40183200	1600	DUP	TRNAS-GGA;ETAA1	intergenic
3	53850401	53853600	3:53850401-53853600	3200	DEL	TRNAC-GCA;SUCLG1	intergenic
4	105295601	105297600	4:105295601-105297600	2000	DUP	LOC101116984;LOC101119040	intergenic
4	105301201	105302800	4:105301201-105302800	1600	DEL	LOC101116984;LOC101119040	intergenic
4	106880801	106883200	4:106880801-106883200	2400	DEL	LOC105612482;LOC101119716	intergenic
4	106886801	106888400	4:106886801-106888400	1600	DEL	LOC105612482;LOC101119716	intergenic
4	112232001	112236400	4:112232001-112236400	4400	DUP	LOC105614569;LOC105615133	intergenic
4	112237201	112239200	4:112237201-112239200	2000	DUP	LOC105614569	exon
4	112254001	112263200	4:112254001-112263200	9200	DUP	LOC101109441;LOC101122778	intergenic
4	112304401	112306400	4:112304401-112306400	2000	DEL	LOC101110230;LOC101122778	intergenic
4	112426401	112428400	4:112426401-112428400	2000	DUP	LOC101123290;LOC105615175	intergenic
4	112456801	112458400	4:112456801-112458400	1600	DUP	LOC105601949;LOC105615175	intergenic
4	112479201	112480800	4:112479201-112480800	1600	DUP	LOC105601949;LOC105615175	intergenic
4	112513601	112515200	4:112513601-112515200	1600	DUP	LOC105601949;LOC105615175	intergenic
4	112521601	112523200	4:112521601-112523200	1600	DUP	LOC105601949;LOC105615175	intergenic
4	112527201	112529200	4:112527201-112529200	2000	DUP	LOC105601949;LOC105615175	intergenic
4	112530401	112532400	4:112530401-112532400	2000	DUP	LOC105601949;LOC105615175	intergenic
4	112533201	112535600	4:112533201-112535600	2400	DUP	LOC105601949;LOC105615175	intergenic
4	112538801	112541600	4:112538801-112541600	2800	DUP	LOC105601949;LOC105614177	intergenic
4	112554401	112557200	4:112554401-112557200	2800	DUP	LOC105601949;LOC105614177	intergenic
4	112589201	112594000	4:112589201-112594000	4800	DUP	LOC105601949;LOC105614177	intergenic
4	112600001	112602000	4:112600001-112602000	2000	DUP	LOC105614177;GIMAP2	intergenic
4	112606001	112612400	4:112606001-112612400	6400	DUP	LOC105614177;GIMAP2	intergenic
4	112709601	112711600	4:112709601-112711600	2000	DUP	LOC101102142	exon
4	21868401	21870000	4:21868401-21870000	1600	DEL	TRNAC-GCA;ETV1	intergenic
4	7543601	7545600	4:7543601-7545600	2000	DUP	LOC105614936;UPP1	intergenic
4	75760801	75763200	4:75760801-75763200	2400	DEL	LOC105615056;IGFBP3	intergenic
4	7593601	7596000	4:7593601-7596000	2400	DEL	UPP1;C4H7orf57	intergenic
4	83004001	83006400	4:83004001-83006400	2400	DEL	TRNAS-GGA;ANKRD7	intergenic
4	88448801	88450800	4:88448801-88450800	2000	DEL	TMEM229A;GPR37	intergenic
4	89456401	89459200	4:89456401-89459200	2800	DEL	LOC101103150;LOC101102641	intergenic
4	89547601	89549200	4:89547601-89549200	1600	DUP	LOC101103150;LOC101102641	intergenic
5	11696001	11700400	5:11696001-11700400	4400	DEL	LOC101111632;LOC101111882	intergenic
5	11705601	11707600	5:11705601-11707600	2000	DEL	LOC101111882;LOC101112395	intergenic
5	15017601	15019600	5:15017601-15019600	2000	DEL	LOC101106326;LOC101106588	intergenic
5	24936001	24938400	5:24936001-24938400	2400	DEL	LOC105615237	intron
5	3364001	3366000	5:3364001-3366000	2000	DEL	LOC101103566;ATP13A1	intergenic
5	3366401	3368400	5:3366401-3368400	2000	DEL	LOC101103566;ATP13A1	intergenic
5	3370801	3374400	5:3370801-3374400	3600	DEL	LOC101103566;ATP13A1	intergenic
5	49255601	49257200	5:49255601-49257200	1600	DUP	LOC105615370;LOC105615369	intergenic
5	49266001	49268800	5:49266001-49268800	2800	DUP	LOC106991169;LOC106991170	intergenic
5	70907601	70910400	5:70907601-70910400	2800	DEL	GABRA1;GABRG2	intergenic
5	81943201	81952400	5:81943201-81952400	9200	DEL	TRNAW-CCA;LOC105606733	intergenic
5	8644001	8646400	5:8644001-8646400	2400	DEL	LOC101112979	exon
5	8646801	8650000	5:8646801-8650000	3200	DEL	LOC101112979;LOC101113494	intergenic
5	8656001	8659200	5:8656001-8659200	3200	DEL	LOC101112979;LOC101113494	intergenic
5	8670001	8671600	5:8670001-8671600	1600	DEL	LOC101112979;LOC101113494	intergenic
5	88360801	88363600	5:88360801-88363600	2800	DEL	LOC105607622	intron
5	8928001	8929600	5:8928001-8929600	1600	DEL	LOC101116053;LOC101116313	intergenic
6	110596001	110597600	6:110596001-110597600	1600	DEL	PROM1	intron
6	169201	170800	6:169201-170800	1600	DUP	APELA	intergenic
6	28698001	28702400	6:28698001-28702400	4400	DUP	PDHA2;UNC5C	intergenic
6	35018401	35020400	6:35018401-35020400	2000	DUP	SNCA;GPRIN3	intergenic
6	74129601	74132400	6:74129601-74132400	2800	DEL	TRNAC-GCA;ADGRL3	intergenic
6	84355601	84357600	6:84355601-84357600	2000	DEL	LOC101118447;LOC101122788	intergenic
6	84360801	84363200	6:84360801-84363200	2400	DEL	LOC101118447;LOC101122788	intergenic
6	84364401	84366400	6:84364401-84366400	2000	DEL	LOC101118447;LOC101122788	intergenic
6	84712001	84714000	6:84712001-84714000	2000	DEL	UGT2A1	intron
7	22396001	22398000	7:22396001-22398000	2000	DUP	-	-
7	22440801	22442400	7:22440801-22442400	1600	DUP	-	-
7	22560801	22565200	7:22560801-22565200	4400	DUP	-	-
7	71239601	71241600	7:71239601-71241600	2000	DEL	LOC106991288;KCNH5	intergenic
7	71684401	71686800	7:71684401-71686800	2400	DEL	LOC106991288;KCNH5	intergenic
8	3914401	3916800	8:3914401-3916800	2400	DEL	HTR1B;IMPG1	intergenic
8	73783201	73786400	8:73783201-73786400	3200	DUP	LRP11;LOC101105006	intergenic
8	73796401	73799200	8:73796401-73799200	2800	DUP	LRP11;LOC101105006	intergenic
9	42706801	42708800	9:42706801-42708800	2000	DUP	ARMC1	exon
9	46297201	46299600	9:46297201-46299600	2400	DEL	SLCO5A1	intron
9	474801	476400	9:474801-476400	1600	DUP	LOC105616107;DDX43	intergenic
9	4755601	4757200	9:4755601-4757200	1600	DUP	LMBRD1	intron
9	53261201	53263200	9:53261201-53263200	2000	DUP	PEX2;LOC105613955	intergenic
9	92562401	92564400	9:92562401-92564400	2000	DEL	LOC101118963;LOC106990576	intergenic

## Sheet: HTS  group-specific CNVRs
Table S3.Detailed information of the detected CNVRs.
chr	start	end	Length	Type	Gene name	Gene type
1	101953201	101954800	1600	DUP	LOC105615728;LOC106990856	intergenic
1	107742001	107744400	2400	DEL	LOC101118497;LOC101112436	intergenic
1	108834801	108836400	1600	DEL	APCS;CRP	intergenic
1	131770801	131772800	2000	DEL	TRNAS-GGA;NCAM2	intergenic
1	1438401	1440000	1600	DUP	LOC101106736;LOC101107492	intergenic
1	160635201	160636800	1600	DEL	LOC101104359;LOC101103944	intergenic
1	175374401	175376800	2400	DEL	TRNAW-CCA;BTLA	intergenic
1	186761601	186763600	2000	DUP	KALRN	intron
1	209208401	209210000	1600	DUP	TBL1XR1;NAALADL2	intergenic
1	218263201	218265200	2000	DUP	LOC105603542;ZBBX	intergenic
1	220559601	220561200	1600	DEL	LOC101116449;SI	intergenic
1	222020801	222022400	1600	DEL	LOC101103029;OTOL1	intergenic
1	234387601	234389200	1600	DEL	LOC101116443;IGSF10	intergenic
1	60548801	60550800	2000	DUP	PRKACB;SAMD13	intergenic
1	65615601	65617200	1600	DUP	LOC105614852;LOC101119773	intergenic
1	65661601	65663600	2000	DUP	LOC101113817;GBP5	intergenic
1	77548801	77550800	2000	DEL	LOC106990850;LOC105615111	intergenic
1	90952001	90954400	2400	DEL	LOC101109325;TRIM33	intergenic
10	23922801	23924800	2000	DEL	UFM1;FREM2	intergenic
10	26672001	26673600	1600	DEL	LOC105611533	intron
10	38120801	38122400	1600	DEL	ATP12A;PCDH9	intergenic
10	38393601	38395200	1600	DEL	ATP12A;PCDH9	intergenic
10	5165601	5167600	2000	DUP	LOC105616123;PCDH17	intergenic
10	55928401	55930000	1600	DEL	LOC105607734	intron
10	67046801	67048400	1600	DEL	GPC5	intron
10	71904801	71907600	2800	DUP	LOC101109370;LOC101109626	intergenic
10	71928801	71930400	1600	DUP	LOC101109626	intron
10	72138401	72140000	1600	DUP	LOC101109890	intron
10	78315201	78317200	2000	DEL	BIVM	intron
11	16381201	16383200	2000	DUP	ASIC2	intron
11	1684401	1686000	1600	DEL	KIF2B;CA10	intergenic
11	1726801	1728400	1600	DEL	KIF2B;CA10	intergenic
11	20587201	20589200	2000	DUP	SSH2	intron
11	40056001	40057600	1600	DUP	WIPF2;CDC6	intergenic
11	47590801	47592400	1600	DUP	ICAM2	intron
11	49645601	49647200	1600	DUP	LOC101106024;LOC101110855	intergenic
11	92801	94400	1600	DEL	CA10	intergenic
11	9281201	9282800	1600	DEL	LOC105616287;PPM1E	intergenic
12	52230401	52232000	1600	DUP	LOC101111473;LOC105613543	intergenic
12	52481201	52483200	2000	DEL	LOC101113513;LOC101114039	intergenic
12	62678401	62680000	1600	DUP	ARPC5;NCF2	intergenic
13	2175201	2176800	1600	DUP	PAK7	intron
13	46115601	46118400	2800	DEL	PRNP;ZMYND11	intergenic
13	50487201	50489200	2000	DUP	RNF24	intron
13	62836401	62838000	1600	DUP	LOC105606907	intron
13	62918801	62920800	2000	DUP	LOC101111988	intron
13	62932801	62934800	2000	DUP	LOC101111988	intron
13	63128401	63130400	2000	DUP	ASIP;AHCY	intergenic
13	63172801	63174800	2000	DUP	AHCY;ITCH	intergenic
13	63186801	63190000	3200	DEL	AHCY;ITCH	intergenic
13	69134801	69136800	2000	DUP	TRNAW-CCA;TOP1	intergenic
13	77106801	77109200	2400	DUP	B4GALT5;PTGIS	intergenic
13	77122801	77124400	1600	DUP	B4GALT5;PTGIS	intergenic
14	58291601	58294800	3200	DUP	LOC101113094;LOC101117868	intergenic
14	58300001	58302800	2800	DUP	LOC101117868	intron
14	58562801	58564400	1600	DEL	LOC101115398;LOC101115153	intergenic
14	60105201	60107600	2400	DUP	LOC100192427;LOC105602100	intergenic
15	12748001	12749600	1600	DUP	LOC101102333;LOC105602130	intergenic
15	1758001	1759600	1600	DEL	GRIA4	intron
15	29154801	29156800	2000	DUP	HINFP	intron
15	45566801	45570000	3200	DUP	LOC101109119;LOC101109643	intergenic
15	45604401	45606000	1600	DUP	LOC101109119;LOC101109643	intergenic
15	45606401	45608000	1600	DUP	LOC101109119;LOC101109643	intergenic
15	80170801	80172400	1600	DUP	MS4A13	intron
16	29283201	29286000	2800	DEL	HCN1	intron
16	45772801	45774400	1600	DUP	TRNAC-GCA;LOC101120952	intergenic
16	46300401	46302000	1600	DEL	TRNAC-GCA;LOC101120952	intergenic
16	46302001	46303600	1600	DEL	TRNAC-GCA;LOC101120952	intergenic
16	64567201	64568800	1600	DEL	TRNAC-GCA;MTRR	intergenic
16	67261601	67263600	2000	DUP	LOC105602646;ICE1	intergenic
17	54124801	54126800	2000	DUP	PPP1CC	intron
17	61953601	61955200	1600	DUP	ALDH2	intron
17	70248801	70250400	1600	DEL	-	-
18	16645201	16647600	2400	DEL	AGBL1	intron
18	18840001	18842400	2400	DUP	LOC101117021;LOC101123585	intergenic
18	32836001	32838000	2000	DEL	CYP1A1;EDC3	intergenic
19	19848001	19850000	2000	DEL	LOC105603423	intron
19	24679601	24681200	1600	DUP	LOC105603623;CNTN4	intergenic
19	27639201	27642400	3200	DEL	LOC105603436;CNTN3	intergenic
19	59029201	59031200	2000	DUP	RAB7A;RPN1	intergenic
2	105438401	105440000	1600	DEL	FBXO8;LOC106990444	intergenic
2	108126001	108127600	1600	DEL	TRNAS-GGA;GALNTL6	intergenic
2	16949201	16950800	1600	DUP	LOC105606824;LOC106990178	intergenic
2	177874001	177876000	2000	DEL	LOC105609847;LOC106990967	intergenic
2	202358401	202360000	1600	DEL	NDUFB3;CFLAR	intergenic
2	218460001	218461600	1600	DEL	LOC105606769;TNS1	intergenic
2	22071201	22073200	2000	DEL	MURC;PLPPR1	intergenic
2	222254001	222255600	1600	DEL	TRNAS-GGA;EPHA4	intergenic
2	33498401	33500400	2000	DUP	CDC26;C2H9orf153	intergenic
2	46338001	46340000	2000	DUP	LOC105607498;LOC101123612	intergenic
2	50193601	50195600	2000	DUP	ALDH1B1;SHB	intergenic
2	65503201	65505200	2000	DUP	TRPM3	intron
2	78494001	78496000	2000	DEL	TRNAC-GCA;PTPRD	intergenic
2	83259601	83261600	2000	DUP	TTC39B	intron
20	1756801	1758400	1600	DEL	LOC105603922;KHDRBS2	intergenic
20	27629601	27631600	2000	DUP	LOC101110710;LOC105603777	intergenic
21	49013601	49015200	1600	DUP	IFITM10;KRTAP5.4	intergenic
22	15766401	15768400	2000	DUP	LOC101107486;LOC101107056	intergenic
22	15890801	15892800	2000	DEL	LOC101106985;LOC101107486	intergenic
22	34965601	34967600	2000	DEL	ATRNL1	intron
23	12796801	12798800	2000	DUP	SYT4;PIK3C3	intergenic
23	31162401	31164000	1600	DEL	SS18;ZNF521	intergenic
23	38615201	38617200	2000	DEL	TRNAC-GCA;DLGAP1	intergenic
24	20382801	20384400	1600	DUP	OTOA;HS3ST2	intergenic
25	4708801	4710400	1600	DEL	DISC1	intron
25	4769601	4771600	2000	DUP	DISC1	intron
26	1415601	1417600	2000	DEL	MYOM2;LOC105605105	intergenic
27	110445601	110447200	1600	DUP	DOCK11	intron
27	1221201	1222800	1600	DUP	CD99	intron
27	134941601	134943200	1600	DEL	PABPC5	intergenic
27	1402001	1405600	3600	DUP	LOC105605318;MXRA5	intergenic
27	1454001	1455600	1600	DUP	MXRA5	intron
27	1657201	1658800	1600	DUP	LOC105605323;PRKX	intergenic
27	1902401	1904000	1600	DUP	LOC105605323;PRKX	intergenic
27	26030801	26032400	1600	DUP	IL1RAPL1	intron
27	2741201	2742800	1600	DUP	LOC101116281;LOC105605670	intergenic
27	317201	318800	1600	DUP	LOC105605310	intergenic
27	3276401	3278000	1600	DUP	LOC101116799;LOC106991978	intergenic
27	34752001	34754000	2000	DUP	LOC101119796	intron
27	349601	351600	2000	DUP	LOC105605310	intergenic
27	3770401	3772000	1600	DUP	NLGN4X	intron
27	3887201	3888800	1600	DUP	PUDP;NLGN4X	intergenic
27	4192001	4193600	1600	DUP	PUDP;NLGN4X	intergenic
27	4646001	4647600	1600	DUP	STS	intron
27	4752401	4754000	1600	DUP	LOC105605334;STS	intergenic
27	4854001	4855600	1600	DUP	LOC105605334;STS	intergenic
27	4866001	4867600	1600	DUP	LOC105605334;STS	intergenic
27	5110001	5111600	1600	DUP	TRNAC-GCA;PNPLA4	intergenic
27	5190801	5192800	2000	DUP	TRNAC-GCA;PNPLA4	intergenic
27	56001	57600	1600	DUP	LOC105605310	intergenic
27	5668401	5670000	1600	DUP	LOC106991979;LOC105605335	intergenic
27	5868801	5870800	2000	DUP	ANOS1	intron
27	5942401	5944000	1600	DEL	LOC105605337;ANOS1	intergenic
27	5948001	5950000	2000	DUP	LOC105605337;ANOS1	intergenic
27	600801	602800	2000	DUP	IL3RA	intron
27	6022801	6024800	2000	DUP	LOC105605337;ANOS1	intergenic
27	6072001	6073600	1600	DUP	LOC105605337;ANOS1	intergenic
27	63198801	63200800	2000	DUP	RLIM;SLC16A2	intergenic
27	6320401	6322000	1600	DUP	LOC105605337;ANOS1	intergenic
27	6323201	6326800	3600	DUP	LOC105605337;ANOS1	intergenic
27	6369601	6371200	1600	DUP	LOC105605337;ANOS1	intergenic
27	6660001	6662000	2000	DUP	TBL1X	intron
27	675201	677200	2000	DUP	P2RY8;AKAP17A	intergenic
27	6922001	6923600	1600	DUP	GPR143;SHROOM2	intergenic
27	71967201	71968800	1600	DUP	LOC105605519	intron
27	730401	732400	2000	DUP	AKAP17A	intron
27	74864001	74865600	1600	DUP	LOC106990654;DACH2	intergenic
27	76615601	76617200	1600	DEL	LOC101106825;LOC105605697	intergenic
27	76624001	76626000	2000	DEL	LOC101106825;LOC105605697	intergenic
27	780001	782000	2000	DUP	ASMT	intron
27	818401	820000	1600	DUP	ASMT;LOC106990378	intergenic
27	87795201	87802000	6800	DUP	SLITRK4;LOC106991976	intergenic
27	95184801	95186400	1600	DEL	PLAC1	intron
3	103352001	103354000	2000	DUP	FAM178B	intron
3	105156401	105158000	1600	DUP	BCL2L11;LOC105611978	intergenic
3	15508001	15509600	1600	DEL	TRNAC-GCA;LOC105614897	intergenic
3	175702001	175703600	1600	DEL	BTBD11	intron
3	189567201	189569200	2000	DEL	LOC105607108;LRMP	intergenic
3	204539601	204542800	3200	DEL	LOC101102973	intron
3	206445601	206447200	1600	DUP	LOC105608615	intron
3	206780801	206782400	1600	DUP	EM4B;LOC105614851	intergenic
3	218477601	218479200	1600	DUP	SAMM50;PARVB	intergenic
3	220200401	220202800	2400	DEL	-	-
3	4890401	4892000	1600	DEL	RAPGEF1;MED27	intergenic
3	76188401	76190400	2000	DUP	LOC101113750	intron
4	112372001	112374000	2000	DEL	LOC101123031;LOC101123290	intergenic
4	112572001	112574000	2000	DUP	LOC105601949;LOC105614177	intergenic
4	35077201	35079200	2000	DEL	TRNAC-GCA;GRM3	intergenic
4	47536801	47538800	2000	DEL	NAMPT;PIK3CG	intergenic
4	63600401	63602400	2000	DEL	BBS9	intron
4	64176001	64178000	2000	DUP	PDE1C	intron
4	75838001	75840000	2000	DEL	LOC105615056;IGFBP3	intergenic
4	823601	826000	2400	DEL	TRNAC-GCA;VSTM2A	intergenic
4	83710001	83711600	1600	DEL	TRNAS-GGA;ANKRD7	intergenic
5	105593201	105594800	1600	DUP	PJA2	intron
5	11158401	11160000	1600	DUP	LOC101103644	intron
5	12791601	12793200	1600	DUP	ILF3;QTRT1	intergenic
5	38824401	38826400	2000	DEL	LOC101117585;LOC101117843	intergenic
5	39130401	39133600	3200	DEL	LOC101119903;LOC101120163	intergenic
5	53464801	53466800	2000	DUP	TRNAC-GCA;KCTD16	intergenic
5	74299201	74300800	1600	DEL	TRNAC-GCA;LOC106990422	intergenic
5	8652001	8654000	2000	DEL	LOC101112979;LOC101113494	intergenic
5	93285201	93286800	1600	DUP	TRNAW-CCA;CAST	intergenic
6	102130801	102132800	2000	DEL	LOC106991241;PPP2R2C	intergenic
6	102442001	102444000	2000	DUP	WFS1	intron
6	110592401	110594000	1600	DEL	PROM1	intron
6	11322801	11324800	2000	DEL	TRNAK-CUU;UGT8	intergenic
6	116692001	116694000	2000	DUP	LOC105601929;PCGF3	intergenic
6	23447601	23449600	2000	DEL	LOC105615429;PPP3CA	intergenic
6	50062801	50064800	2000	DEL	PCDH7	intron
6	996801	998400	1600	DEL	LOC105613737;MARCH1	intergenic
7	11279201	11281200	2000	DEL	ERO1A	intron
7	22423201	22425200	2000	DUP	-	-
7	22447201	22448800	1600	DUP	-	-
7	58976001	58977600	1600	DUP	DUT;FBN1	intergenic
7	61356001	61357600	1600	DUP	LOC101113241;SEMA6D	intergenic
7	85441201	85444400	3200	DUP	GSTZ1;TMED8	intergenic
7	93776401	93778000	1600	DEL	TRNAK-UUU;FLRT2	intergenic
8	29300001	29302000	2000	DEL	SEC63;SCML4	intergenic
9	30200001	30202000	2000	DEL	LOC101110341;ZHX2	intergenic
9	46155201	46156800	1600	DUP	SLCO5A1	exon
9	63259601	63261200	1600	DEL	TRNAW-CCA;TRNAC-GCA	intergenic
9	90964801	90966400	1600	DUP	LOC105610835	intron

## Sheet: OTS  group-specific CNVRs
Table S3.Detailed information of the detected CNVRs.
chr	start	end	Length	Type	Gene name	Gene type
1	110261601	110263600	2000	DUP	ITLN;CD244	intergenic
1	1453601	1457200	3600	DUP	LOC101107492;LOC101107754	intergenic
1	150510401	150512400	2000	DEL	TRNAS-GGA;CADM2	intergenic
1	150523201	150529200	6000	DEL	TRNAS-GGA;CADM2	intergenic
1	153636801	153639200	2400	DEL	TRNAR-ACG;VGLL3	intergenic
1	169868401	169870400	2000	DUP	LOC105612549	intron
1	211000001	211002000	2000	DUP	TRNAS-GGA;NLGN1	intergenic
1	21242801	21245200	2400	DUP	LOC101105863	intron
1	258750401	258752400	2000	DEL	DSCAM	intron
1	33973601	33976000	2400	DUP	FGGY	intron
1	50521201	50522800	1600	DUP	TYW3;LHX8	intergenic
1	62554801	62556400	1600	DUP	TRNAV-CAC;COL24A1	intergenic
1	76274801	76276800	2000	DUP	FRRS1;AGL	intergenic
1	81411601	81414800	3200	DEL	LOC101119090;PRMT6	intergenic
1	84309201	84311200	2000	DEL	VAV3	intron
10	17493201	17494800	1600	DEL	SUCLA2;HTR2A	intergenic
10	3434001	3436000	2000	DUP	LOC105612615;LOC105616123	intergenic
10	36266001	36267600	1600	DUP	GJA3;GJB2	intergenic
10	70380801	70384000	3200	DEL	LOC101106781	intron
10	71199601	71201600	2000	DEL	LOC105601928	intron
10	71316801	71318800	2000	DUP	LOC105616213;LOC105614203	intergenic
10	71318401	71320400	2000	DEL	LOC105616213;LOC105614203	intergenic
10	72014401	72016000	1600	DEL	LOC101109626	intron
10	9479201	9481600	2400	DEL	LOC105610339;PCDH17	intergenic
11	18863201	18864800	1600	DEL	LOC101118202;LOC101102156	intergenic
11	40828801	40830400	1600	DUP	LOC101115138	intron
11	55788801	55790800	2000	DUP	LOC101104414	intron
11	55802001	55803600	1600	DUP	LOC101104414;LOC101105174	intergenic
11	58036401	58038000	1600	DUP	LOC105606322;LOC105616446	intergenic
11	59912001	59913600	1600	DEL	LOC105610552;MAP2K6	intergenic
11	671601	673200	1600	DEL	CA10	intron
12	11381201	11383600	2400	DUP	LOC105611808	intron
12	12570401	12572000	1600	DEL	LOC106990525;LOC105611808	intergenic
12	45523601	45527200	3600	DEL	TRNAS-GCU;NPHP4	intergenic
12	5638401	5640400	2000	DEL	LOC106991476;LOC106990645	intergenic
12	76442401	76444400	2000	DUP	LOC105613171;NR5A2	intergenic
13	2169201	2171200	2000	DEL	PAK7	intron
13	54655201	54656800	1600	DEL	CDH4	intron
13	60836001	60837600	1600	DUP	TM9SF4	exon
13	63111201	63112800	1600	DEL	ASIP	intron
14	45976401	45978400	2000	DEL	ZNF382	intron
14	49432001	49433600	1600	DUP	ERICH4;LOC105614373	intergenic
14	49448401	49450400	2000	DUP	LOC105614373	intron
14	49691601	49694400	2800	DUP	LOC105616889;LOC101122545	intergenic
14	49734001	49735600	1600	DUP	LOC105616889;LOC101122545	intergenic
14	56888001	56890400	2400	DUP	LOC101105099;LOC101104852	intergenic
15	13187201	13188800	1600	DEL	LOC101102333;LOC105602130	intergenic
15	15904801	15906400	1600	DEL	GUCY1A2	intron
15	19169601	19171200	1600	DEL	C15H11orf87;ZC3H12C	intergenic
15	44431201	44432800	1600	DUP	OVCH2;LOC101106282	intergenic
15	76560401	76563600	3200	DEL	LOC101106283;LOC101106033	intergenic
16	65547201	65548800	1600	DUP	ADCY2	intron
17	9569601	9571200	1600	DEL	NR3C2	intron
18	20302401	20304000	1600	DUP	ANPEP	intron
18	42938401	42940400	2000	DUP	NPAS3	intron
18	6224801	6226400	1600	DUP	TRNASTOP-UCA;MEF2A	intergenic
19	16579601	16581600	2000	DUP	TATDN2	intron
19	24801	26400	1600	DUP	LOC105603319	intergenic
19	28735201	28736800	1600	DUP	PPP4R2	intron
19	47550801	47552400	1600	DUP	DCP1A;CACNA1D	intergenic
19	7348001	7349600	1600	DEL	GLB1	intron
2	142860001	142861600	1600	DUP	CSRNP3	intron
2	174570401	174572000	1600	DEL	RAB3GAP1	intron
2	184170801	184172800	2000	DUP	PTPN4	intron
2	194708401	194710000	1600	DUP	LOC105610070;LOC106990202	intergenic
2	56388401	56390400	2000	DUP	LOC101111526;LOC101120137	intergenic
20	18320401	18322000	1600	DUP	SUPT3H	intron
20	25524401	25528000	3600	DEL	OVAR-DRB3	intron
20	28568001	28569600	1600	DEL	LOC101119515;LOC101116772	intergenic
20	31931601	31933600	2000	DUP	ACOT13	intron
20	8897201	8899200	2000	DUP	UHRF1BP1	intron
20	913201	915200	2000	DEL	KHDRBS2	intron
21	26133201	26135200	2000	DUP	LOC101104356;LOC101104617	intergenic
21	26137601	26140000	2400	DEL	LOC101104356;LOC101104617	intergenic
21	40978401	40980000	1600	DUP	LOC101119346	intron
22	2712001	2713600	1600	DUP	ZWINT;PCDH15	intergenic
22	30860001	30861600	1600	DUP	ADRA2A;GPAM	intergenic
22	33910401	33912000	1600	DUP	ABLIM1	intron
22	9066801	9068400	1600	DUP	PAPSS2	intron
23	192401	196000	3600	DEL	LOC105601878	intron
23	2744001	2746000	2000	DUP	ZNF516;LOC105604384	intergenic
23	42396401	42398000	1600	DUP	APCDD1;VAPA	intergenic
25	1698001	1699600	1600	DEL	PGBD5;GALNT2	intergenic
25	4610801	4612800	2000	DUP	DISC1	intron
25	4712001	4714000	2000	DEL	DISC1	intron
25	7876401	7878000	1600	DEL	TOMM20	intron
26	37660801	37662400	1600	DUP	LRRC3B;LOC101120889	intergenic
27	101876801	101878400	1600	DUP	THOC2	intron
27	1228001	1229600	1600	DUP	XG;CD99	intergenic
27	1512401	1514000	1600	DUP	LOC105605319	exon
27	1878801	1880800	2000	DUP	LOC105605323;PRKX	intergenic
27	24195601	24197200	1600	DUP	TRNAC-ACA;LOC105605406	intergenic
27	28401	30400	2000	DUP	LOC105605310	intergenic
27	30966001	30968000	2000	DUP	DMD	intron
27	3660801	3662400	1600	DUP	NLGN4X	intron
27	3696801	3698400	1600	DUP	NLGN4X	intron
27	3807201	3809200	2000	DUP	NLGN4X	intron
27	3929601	3931600	2000	DUP	PUDP;NLGN4X	intergenic
27	40950401	40952000	1600	DUP	MAOB;NDP	intergenic
27	4432801	4434400	1600	DUP	PUDP;NLGN4X	intergenic
27	45422801	45425200	2400	DEL	ZC3H12B	intron
27	4687601	4689200	1600	DUP	LOC105605334;STS	intergenic
27	4736401	4738000	1600	DUP	LOC105605334;STS	intergenic
27	4924801	4926800	2000	DUP	LOC105605334;STS	intergenic
27	5148001	5149600	1600	DUP	TRNAC-GCA;PNPLA4	intergenic
27	55281201	55282800	1600	DUP	EDA2R	intron
27	56082801	56084400	1600	DEL	LOC101119962;EDA2R	intergenic
27	56520001	56522000	2000	DUP	LOC101119962;AR	intergenic
27	57671201	57672800	1600	DUP	OPHN1	intron
27	5801601	5803200	1600	DUP	ANOS1	intron
27	6016801	6018400	1600	DUP	LOC105605337;ANOS1	intergenic
27	60939201	60941200	2000	DUP	LOC101107932;LOC101108193	intergenic
27	61030401	61032000	1600	DUP	NHSL2	intron
27	6111601	6114000	2400	DUP	LOC105605337;ANOS1	intergenic
27	6178801	6182400	3600	DUP	LOC105605337;ANOS1	intergenic
27	63663201	63665600	2400	DUP	ABCB7	intron
27	6543201	6544800	1600	DUP	LOC105605337;TBL1X	intergenic
27	6651201	6653600	2400	DUP	TBL1X	intron
27	68040401	68044400	4000	DEL	HMGN5;BRWD3	intergenic
27	68045201	68046800	1600	DEL	HMGN5;BRWD3	intergenic
27	7107601	7109200	1600	DUP	LOC105605341;LOC105605344	intergenic
27	753601	756000	2400	DUP	ASMT	intron
27	76424801	76426400	1600	DUP	LOC101106825;LOC105605697	intergenic
27	80562401	80564000	1600	DUP	LOC101115512;MAMLD1	intergenic
27	82950401	82952400	2000	DUP	FMR1;LOC101112382	intergenic
27	8456001	8457600	1600	DUP	LOC106990249;LOC105605347	intergenic
27	89064001	89066000	2000	DEL	LDOC1;LOC106991993	intergenic
27	93694001	93695600	1600	DUP	LOC105607128;MAP7D3	intergenic
27	94238801	94240400	1600	DEL	LOC105605573;LOC101105554	intergenic
3	111994401	111996400	2000	DUP	OSBPL8	exon
3	112439601	112441200	1600	DUP	CSRP2	exon
3	123216801	123218400	1600	DEL	C3H12orf50;MGAT4C	intergenic
3	125064401	125066400	2000	DUP	TRNAG-CCC;LOC105610274	intergenic
3	158242001	158243600	1600	DUP	LOC106991000;FAM19A2	intergenic
3	163917601	163920000	2400	DEL	LOC101111875;LOC101118006	intergenic
3	182064801	182068800	4000	DEL	BICD1	intron
3	220281201	220282800	1600	DEL	-	-
3	24819201	24820800	1600	DEL	RAD51AP2;FAM49A	intergenic
3	35604001	35605600	1600	DUP	WDR43	intron
3	55043601	55045600	2000	DEL	TRNAC-GCA;SUCLG1	intergenic
3	790801	792800	2000	DUP	EXD3;TRAF2	intergenic
3	81286001	81288000	2000	DUP	MTA3	intron
4	105308401	105310000	1600	DEL	LOC101116984;LOC101119040	intergenic
4	112323201	112326000	2800	DUP	LOC101110230;LOC101110502	intergenic
4	112337601	112339600	2000	DUP	LOC101110230;LOC101110502	intergenic
4	112430401	112432400	2000	DUP	LOC101123290;LOC105615175	intergenic
4	40868801	40870400	1600	DUP	GNAT3;GNAI1	intergenic
4	6314801	6316800	2000	DUP	LOC105614936;UPP1	intergenic
4	94314401	94316400	2000	DEL	COPG2	intron
5	11719201	11721200	2000	DEL	LOC101111882;LOC101112395	intergenic
5	21822001	21824000	2000	DEL	LOC105608691;CHSY3	intergenic
5	26957201	26958800	1600	DEL	LOC105611654;LOC105611655	intergenic
5	3907201	3909200	2000	DUP	SLC25A42;ARMC6	intergenic
5	49260001	49261600	1600	DUP	LOC105615370;LOC106991169	intergenic
5	6523201	6524800	1600	DUP	AP1M1	intron
5	8063201	8065200	2000	DUP	LOC101104488;LOC101104746	intergenic
5	8677201	8680000	2800	DEL	LOC101112979;LOC101113494	intergenic
5	8683201	8684800	1600	DEL	LOC101112979;LOC101113494	intergenic
6	20204001	20206000	2000	DEL	LOC105612165;CXXC4	intergenic
6	3340401	3345200	4800	DUP	NAF1;BBS7	intergenic
6	50688001	50689600	1600	DEL	TRNAC-GCA;PCDH7	intergenic
6	52661201	52663200	2000	DEL	TRNAC-GCA;TRNAC-GCA	intergenic
6	61556001	61558000	2000	DEL	ATP8A1;GRXCR1	intergenic
6	6996801	6998800	2000	DUP	PRSS12	intron
6	73795201	73796800	1600	DEL	TRNAC-GCA;ADGRL3	intergenic
6	74134801	74136400	1600	DEL	TRNAC-GCA;ADGRL3	intergenic
6	84131601	84133200	1600	DUP	UGT2B7;LOC105614163	intergenic
6	84506801	84508800	2000	DUP	LOC101122788	intron
6	84512001	84514400	2400	DUP	LOC101122788	intron
6	9886401	9888000	1600	DEL	LOC105612939;LOC105613665	intergenic
7	22357201	22360000	2800	DEL	-	-
7	22362801	22364400	1600	DEL	-	-
7	22376801	22378800	2000	DUP	-	-
7	24351601	24353200	1600	DEL	LOC101123383;LOC101117508	intergenic
7	6344001	6345600	1600	DEL	ANKRD31	intron
7	65324001	65326000	2000	DEL	LOC105612959;LOC106991285	intergenic
7	85959601	85961200	1600	DUP	ADCK1	intron
7	96980401	96982800	2400	DEL	SPATA7;PTPN21	intergenic
8	81307601	81311200	3600	DEL	GTF2H5;TULP4	intergenic
9	25910401	25912000	1600	DUP	LOC106991345;LOC106991346	intergenic
9	26554001	26557600	3600	DEL	LOC106991346;LOC105614550	intergenic
9	26560001	26562000	2000	DEL	LOC106991346;LOC105614550	intergenic
9	67233601	67235200	1600	DEL	KCNV1;SYBU	intergenic

## Sheet: VTS  group-specific CNVRs
Table S3.Detailed information of the detected CNVRs.
chr	start	end	Length	Type	Gene name	Gene type
1	107997201	108001200	4000	DEL	LOC101121310;LOC105605630	intergenic
1	110358001	110359600	1600	DUP	ITLN2;F11R	intergenic
1	113356801	113358800	2000	DEL	TRNAC-ACA;NUF2	intergenic
1	11541201	11542800	1600	DUP	GRIK3	intron
1	123545201	123547200	2000	DEL	LOC101115849;LOC101116371	intergenic
1	149527201	149528800	1600	DUP	TRNAS-GGA;GBE1	intergenic
1	163484801	163486800	2000	DUP	ABI3BP	intron
1	181639201	181641200	2000	DUP	TRNAS-GGA;LOC101104286	intergenic
1	193498001	193499600	1600	DEL	LOC105602566;FGF12	intergenic
1	210606801	210608800	2000	DEL	NAALADL2	intron
1	226848401	226850000	1600	DEL	GFM1;MLF1	intergenic
1	23550801	23552800	2000	DEL	AGBL4	intron
1	238692001	238694000	2000	DUP	LOC106990808	intron
1	26736001	26738000	2000	DUP	GPX7;ZCCHC11	intergenic
1	34484801	34486400	1600	DEL	LOC101121820;LOC101104943	intergenic
1	34512001	34514000	2000	DEL	LOC101121820;LOC101104943	intergenic
1	51127201	51128800	1600	DUP	RABGGTB;SLC44A5	intergenic
1	7121601	7123600	2000	DUP	LOC105616317	exon
1	81883201	81885600	2400	DEL	LOC101119090;PRMT6	intergenic
1	82386401	82388800	2400	DUP	LOC101119090;PRMT6	intergenic
11	10013601	10016000	2400	DEL	LOC105611226	intron
11	2647201	2648800	1600	DUP	KIF2B;CA10	intergenic
11	29146801	29148400	1600	DEL	LOC101103408	intron
11	41370401	41372800	2400	DEL	HAP1	intron
12	12356001	12357600	1600	DEL	LOC106990525;LOC105611808	intergenic
12	23820801	23822800	2000	DUP	TRNAT-UGU;DUSP10	intergenic
12	49259601	49261200	1600	DEL	FAM132A	intron
12	78128801	78130400	1600	DUP	LOC106991504;SYT2	intergenic
12	8202001	8203600	1600	DEL	TRNAK-UUU;TRNAC-GCA	intergenic
13	16518401	16520400	2000	DUP	CCDC3;LOC101109728	intergenic
13	53621601	53623600	2000	DUP	BHLHE23;YTHDF1	intergenic
13	7340801	7342800	2000	DUP	MACROD2	intron
14	44356001	44358400	2400	DEL	LOC105616873;LOC105607568	intergenic
14	48341601	48343600	2000	DUP	EID2;DYRK1B	intergenic
14	49363201	49364800	1600	DUP	LOC105614537;LOC101122718	intergenic
14	49370801	49373200	2400	DUP	LOC105614537;LOC101122718	intergenic
14	57182401	57184000	1600	DUP	LOC101107626	intron
14	57193601	57195200	1600	DUP	LOC101107626;LOC101107891	intergenic
14	57196401	57199200	2800	DUP	LOC101107626;LOC101107891	intergenic
14	58284401	58287200	2800	DUP	LOC101113094;LOC101117868	intergenic
14	59730801	59732800	2000	DUP	LOC101102754	intron
15	26615601	26617600	2000	DUP	LOC105602190;LOC105602189	intergenic
15	76739201	76741600	2400	DEL	LOC101109120;LOC101109389	intergenic
16	19601	21200	1600	DUP	LOC101103182;LOC105602432	intergenic
16	23601	25200	1600	DUP	LOC101103182;LOC105602432	intergenic
16	45139601	45141200	1600	DEL	LOC105602604;TRNAC-GCA	intergenic
16	47601	50000	2400	DUP	LOC105602432;LOC106991654	intergenic
16	66691201	66692800	1600	DEL	MED10;LOC105602644	intergenic
16	69800401	69802000	1600	DUP	LOC105602654;LOC105602652	intergenic
17	11332801	11334800	2000	DUP	TTC29	intron
17	60996801	60998400	1600	DUP	SLC8B1;OAS2	intergenic
18	50928001	50929600	1600	DEL	LOC101104431;LRFN5	intergenic
18	68162401	68164000	1600	DUP	LOC105603285;BRF1	intergenic
19	51330001	51331600	1600	DUP	SHISA5	intron
2	107312001	107314000	2000	DEL	GALNTL6	intron
2	174627601	174629600	2000	DEL	RAB3GAP1	intron
2	188204401	188206000	1600	DEL	TRNAC-GCA;CNTNAP5	intergenic
2	199310801	199313200	2400	DEL	PLCL1	intron
2	39179601	39181600	2000	DUP	PPP2R2A	intron
2	40886001	40888000	2000	DUP	NEFM;ADAM7	intergenic
2	40888401	40893200	4800	DUP	NEFM;ADAM7	intergenic
2	55386801	55388400	1600	DEL	LOC101111001;LOC101119878	intergenic
2	79888001	79889600	1600	DUP	TRNAC-GCA;PTPRD	intergenic
2	80557201	80558800	1600	DEL	TRNAC-GCA;TYRP1	intergenic
2	98579601	98581600	2000	DUP	TRNAW-CCA;LOC101112287	intergenic
20	1978801	1980400	1600	DEL	LOC105603922;PRIM2	intergenic
20	25308001	25309600	1600	DEL	LOC101108696;OVAR-DRB1	intergenic
20	25634401	25636000	1600	DEL	DQA;LOC101120871	intergenic
20	31946001	31948000	2000	DUP	TDP2;KIAA0319	intergenic
20	34266001	34269600	3600	DUP	PRL;TRNAC-ACA	intergenic
20	50431601	50433200	1600	DUP	LOC105603914;LOC105603915	intergenic
20	50444001	50445600	1600	DUP	LOC105603915	intron
20	909201	911600	2400	DEL	KHDRBS2	intron
21	18976801	18978400	1600	DUP	LOC101117804;LUZP2	intergenic
21	26401601	26403200	1600	DEL	LOC101107914	intron
21	38499601	38501200	1600	DEL	LOC101104869;LOC105604093	intergenic
22	10996401	10998000	1600	DUP	PANK1	intron
22	24125601	24127200	1600	DEL	CFAP58;SORCS3	intergenic
22	27226401	27228400	2000	DEL	LOC105604280;SORCS1	intergenic
22	28242801	28244400	1600	DUP	TRNAY-GUA;LOC105604280	intergenic
22	49270401	49272000	1600	DUP	TRNAG-UCC;TCERG1L	intergenic
23	183201	185600	2400	DEL	LOC105601878	intron
23	21858801	21860400	1600	DEL	INO80C	intron
23	27812801	27814400	1600	DEL	TRNAC-GCA;TRNAS-GGA	intergenic
23	55781201	55782800	1600	DUP	TCF4;LOC105604541	intergenic
23	7942401	7944400	2000	DUP	DOK6;CCDC102B	intergenic
24	20559201	20561200	2000	DUP	HS3ST2	intron
25	16604401	16607200	2800	DEL	LOC106991938;TMEM26	intergenic
25	26188801	26190800	2000	DEL	NPFFR1	intron
25	35036001	35037600	1600	DUP	PLAC9;SFTPD	intergenic
26	21916401	21918400	2000	DUP	LOC106991950;LOC101122662	intergenic
27	106704401	106706000	1600	DEL	LOC101119281;LOC106990690	intergenic
27	1070001	1072000	2000	DUP	DHRSX	intron
27	114960801	114962400	1600	DUP	LOC101108550;AMOT	intergenic
27	116950801	116952400	1600	DUP	LOC101113047;LOC105612323	intergenic
27	132216001	132217600	1600	DEL	LOC101103955;PCDH11X	intergenic
27	135105201	135106800	1600	DUP	PABPC5	intergenic
27	1561601	1563200	1600	DEL	LOC105605320;PRKX	intergenic
27	1722801	1724400	1600	DUP	LOC105605323;PRKX	intergenic
27	1763201	1764800	1600	DUP	LOC105605323;PRKX	intergenic
27	1790801	1792400	1600	DUP	LOC105605323;PRKX	intergenic
27	18125601	18127200	1600	DUP	LOC101105635;RPS6KA3	intergenic
27	1892801	1894400	1600	DUP	LOC105605323;PRKX	intergenic
27	19200401	19202000	1600	DEL	SMS	intron
27	2098401	2101200	2800	DUP	LOC101117055;LOC101116018	intergenic
27	2127601	2129200	1600	DUP	LOC101117055;LOC101116018	intergenic
27	2820001	2822400	2400	DUP	LOC101116281;LOC105605670	intergenic
27	2883201	2884800	1600	DUP	LOC101116537;LOC101116799	intergenic
27	3002401	3004000	1600	DUP	LOC101116799;LOC106991978	intergenic
27	30210401	30212400	2000	DUP	DMD	intron
27	3147601	3149200	1600	DUP	LOC101116799;LOC106991978	intergenic
27	3280801	3282400	1600	DUP	LOC101116799;LOC106991978	intergenic
27	3644001	3645600	1600	DUP	NLGN4X	intron
27	3778001	3779600	1600	DUP	NLGN4X	intron
27	3916001	3917600	1600	DUP	PUDP;NLGN4X	intergenic
27	3938001	3940000	2000	DUP	PUDP;NLGN4X	intergenic
27	3993201	3995200	2000	DUP	PUDP;NLGN4X	intergenic
27	4040401	4042000	1600	DUP	PUDP;NLGN4X	intergenic
27	4257201	4258800	1600	DUP	PUDP;NLGN4X	intergenic
27	430801	432400	1600	DUP	LOC105605310	intron
27	43271201	43273200	2000	DUP	ZNF674;LOC101108987	intergenic
27	4408001	4409600	1600	DUP	PUDP;NLGN4X	intergenic
27	4568401	4570800	2400	DUP	STS	intron
27	4579201	4581600	2400	DUP	STS	intron
27	4661201	4663200	2000	DUP	STS	intron
27	47914401	47916400	2000	DUP	PFKFB1	intron
27	4836801	4838400	1600	DUP	LOC105605334;STS	intergenic
27	4882801	4884400	1600	DUP	LOC105605334;STS	intergenic
27	4900401	4902000	1600	DUP	LOC105605334;STS	intergenic
27	5004801	5006400	1600	DUP	TRNAC-GCA;PNPLA4	intergenic
27	51133601	51135200	1600	DEL	LOC105605465;SHROOM4	intergenic
27	5135601	5137200	1600	DUP	TRNAC-GCA;PNPLA4	intergenic
27	51739201	51740800	1600	DUP	LOC101123606;DGKK	intergenic
27	5561601	5563200	1600	DUP	LOC105605336	intron
27	5654001	5656400	2400	DUP	LOC106991979;LOC105605336	intergenic
27	5716401	5718000	1600	DUP	LOC106991979;LOC105605335	intergenic
27	5882001	5883600	1600	DUP	ANOS1	intron
27	5978401	5980000	1600	DUP	LOC105605337;ANOS1	intergenic
27	6050401	6052000	1600	DUP	LOC105605337;ANOS1	intergenic
27	6114401	6116000	1600	DUP	LOC105605337;ANOS1	intergenic
27	63789601	63791600	2000	DEL	LOC101115345;ABCB7	intergenic
27	6455601	6458000	2400	DUP	LOC105605337;ANOS1	intergenic
27	67134401	67136000	1600	DUP	ITM2A;TBX22	intergenic
27	71154801	71156400	1600	DUP	CYLC1;RPS6KA6	intergenic
27	71599201	71600800	1600	DUP	HDX	intron
27	76436401	76438000	1600	DUP	LOC101106825;LOC105605697	intergenic
27	77528801	77530400	1600	DEL	PDZD4	exon
27	88515601	88517600	2000	DUP	LOC101121319;LDOC1	intergenic
27	94244801	94247200	2400	DEL	LOC105605573;LOC101105554	intergenic
3	118954401	118956000	1600	DEL	LOC101104054;TMTC2	intergenic
3	144195601	144197200	1600	DUP	PPHLN1	intron
3	145873201	145878000	4800	DEL	CNTN1	intron
3	159305601	159307600	2000	DUP	LOC106991000;SLC16A7	intergenic
3	188668401	188670400	2000	DEL	TRNAC-GCA;RASSF8	intergenic
3	195598401	195600400	2000	DUP	LOC101116645;CAPZA3	intergenic
3	205170401	205172800	2400	DEL	LOC101104482;LOC101122683	intergenic
3	205405601	205410000	4400	DUP	LOC101104740	intron
3	206853201	206856400	3200	DUP	LOC100191064	intron
3	217952401	217954000	1600	DUP	SCUBE1;MPPED1	intergenic
3	25439601	25441600	2000	DUP	RAD51AP2;VSNL1	intergenic
3	31963601	31965600	2000	DUP	NCOA1	intron
3	39187601	39189200	1600	DUP	LOC105613207	exon
3	52301601	52304000	2400	DEL	TRNAC-GCA;CTNNA2	intergenic
3	58450001	58452000	2000	DUP	KRCC1;CD8B	intergenic
3	94401	99200	4800	DEL	LOC101122774;LOC101123026	intergenic
3	96708001	96709600	1600	DEL	TACR1	intron
4	100090401	100092000	1600	DEL	CHRM2	intron
4	112229601	112231200	1600	DUP	LOC105614569;LOC105615133	intergenic
4	112420001	112422000	2000	DUP	LOC101123290;LOC105615175	intergenic
4	112523601	112526400	2800	DUP	LOC105601949;LOC105615175	intergenic
4	115034801	115038000	3200	DEL	ACTR3B;DPP6	intergenic
4	30725601	30727600	2000	DUP	CDCA7L;RAPGEF5	intergenic
5	21428401	21430400	2000	DEL	LOC101104062;CHSY3	intergenic
5	34474801	34476400	1600	DUP	LOC105611207;LOC105611204	intergenic
5	49257201	49258800	1600	DUP	LOC105615370	exon
5	49272801	49274400	1600	DUP	LOC106991170	intron
5	8636801	8638400	1600	DEL	LOC101112479;LOC101112979	intergenic
5	8639601	8643200	3600	DEL	LOC101112479;LOC101112979	intergenic
5	93264801	93266800	2000	DUP	TRNAW-CCA;CAST	intergenic
6	102543601	102545200	1600	DUP	LOC101112981;JAKMIP1	intergenic
6	109705601	109708000	2400	DEL	CPEB2;C1QTNF7	intergenic
6	114465601	114467600	2000	DUP	ADRA2C;LOC105615584	intergenic
6	12634401	12636400	2000	DEL	ANK2	intron
6	18627201	18628800	1600	DUP	GIMD1;DKK2	intergenic
6	2461601	2463200	1600	DEL	TKTL2;NPY5R	intergenic
6	51403201	51404800	1600	DEL	TRNAC-GCA;PCDH7	intergenic
6	71738001	71740000	2000	DUP	LOC105615499	intron
6	9676001	9679200	3200	DEL	LOC105612939;LOC105613665	intergenic
7	21640801	21642400	1600	DUP	LOC101105503	intron
7	60667201	60668800	1600	DEL	LOC101113241;SEMA6D	intergenic
7	94401	96800	2400	DUP	TRNAK-UUU	intergenic
8	36366001	36368000	2000	DUP	ASCC3	intron
8	51272001	51274000	2000	DEL	LOC105611298;NT5E	intergenic
8	57704401	57706400	2000	DEL	LOC101103241;LOC101119225	intergenic
9	12319201	12321200	2000	DEL	EYS;PHF3	intergenic
9	13062001	13064400	2400	DUP	LOC106991342;LOC105612928	intergenic
9	14320001	14321600	1600	DEL	LOC101116324;LOC101118536	intergenic
9	22096401	22098000	1600	DEL	EFR3A	intron
9	50499201	50500800	1600	DUP	PI15;GDAP1	intergenic
9	5286801	5288400	1600	DEL	ADGRB3	intron
9	93898401	93900000	1600	DUP	COL14A1	intron
